# Supplementary material for: Alterations in brain networks in children with sub-threshold autism spectrum disorder: A magnetoencephalography study
Source: Front Psychiatry. 2022 Aug 5;13:959763. doi: 10.3389/fpsyt.2022.959763 (PMC9390481; doi:10.3389/fpsyt.2022.959763)
Supplement: Supplementary file 2 [file Table_1.xlsx]

## Sheet: TableS1
Supplementary Table 1. Group differences in graph metrics
Frequency band	Coefficient	95% CI			p
delta_C
ASD-Unlikely vs ASD-Possible	-0.044	-0.248	–	0.16	0.675
ASD-Unlikely vs ASD-Probable	-0.271	-0.508	–	-0.033	0.077
ASD-Possible vs ASD-Probable	-0.227	-0.46	–	0.005	0.083
age	0.004	-0.004	–	0.013	0.338
sex	0.088	-0.122	–	0.298	0.412
IQ	0.002	-0.004	–	0.009	0.532
delta_L
ASD-Unlikely vs ASD-Possible	0.015	-0.037	–	0.068	0.781
ASD-Unlikely vs ASD-Probable	-0.009	-0.069	–	0.052	0.781
ASD-Possible vs ASD-Probable	-0.024	-0.084	–	0.036	0.781
age	0.001	-0.001	–	0.003	0.334
sex	0.009	-0.451	–	0.063	0.746
IQ	0.001	-0.001	–	0.002	0.444
delta_SW
ASD-Unlikely vs ASD-Possible	-0.146	-0.289	–	-0.004	0.044*
ASD-Unlikely vs ASD-Probable	-0.322	-0.485	–	-0.158	0.000**
ASD-Possible vs ASD-Probable	-0.175	-0.337	–	-0.014	0.044*
age	0.002	-0.006	–	0.006	0.955
sex	0.108	-0.038	–	0.254	0.146
IQ	0.003	-0.001	–	0.007	0.187
theta_C
ASD-Unlikely vs ASD-Possible	-0.036	-0.227	–	0.155	0.715
ASD-Unlikely vs ASD-Probable	-0.211	-0.433	–	0.01	0.172
ASD-Possible vs ASD-Probable	-0.176	-0.394	–	0.043	0.172
age	0.004	-0.004	–	0.011	0.378
sex	0.044	-0.155	–	0.243	0.667
IQ	0.002	-0.004	–	0.009	0.431
theta_L
ASD-Unlikely vs ASD-Possible	0	-0.047	–	0.048	0.984
ASD-Unlikely vs ASD-Probable	-0.023	-0.079	–	0.032	0.613
ASD-Possible vs ASD-Probable	-0.024	-0.079	–	0.031	0.613
age	0.001	-0.001	–	0.003	0.397
sex	-0.002	-0.052	–	0.047	0.93
IQ	0.001	-0.001	–	0.002	0.357
theta_SW
ASD-Unlikely vs ASD-Possible	-0.085	-0.236	–	0.066	0.27
ASD-Unlikely vs ASD-Probable	-0.257	-0.43	–	-0.083	0.011*
ASD-Possible vs ASD-Probable	-0.172	-0.342	–	-0.001	0.072
age	0	-0.006	–	0.006	0.992
sex	0.123	-0.318	–	0.278	0.119
IQ	0.002	-0.003	–	0.007	0.378
alpha_C
ASD-Unlikely vs ASD-Possible	0.022	-0.144	–	0.188	0.798
ASD-Unlikely vs ASD-Probable	-0.135	-0.327	–	0.058	0.256
ASD-Possible vs ASD-Probable	-0.156	-0.346	–	0.033	0.256
age	0.002	-0.005	–	0.009	0.576
sex	0.085	-0.087	–	0.258	0.332
IQ	0.003	-0.003	–	0.008	0.335
alpha_L
ASD-Unlikely vs ASD-Possible	-0.001	-0.043	–	0.041	0.968
ASD-Unlikely vs ASD-Probable	-0.022	-0.071	–	0.027	0.597
ASD-Possible vs ASD-Probable	-0.021	-0.069	–	0.027	0.597
age	0.001	-0.001	–	0.003	0.258
sex	0.008	-0.036	–	0.051	0.723
IQ	0.001	0	–	0.002	0.168
alpha_SW
ASD-Unlikely vs ASD-Possible	-0.039	-0.206	–	0.128	0.648
ASD-Unlikely vs ASD-Probable	-0.184	-0.376	–	0.009	0.184
ASD-Possible vs ASD-Probable	-0.145	-0.333	–	0.044	0.198
age	0	-0.006	–	0.007	0.926
sex	0.109	-0.062	–	0.279	0.212
IQ	0.002	-0.003	–	0.007	0.474
beta_C
ASD-Unlikely vs ASD-Possible	-0.01	-0.199	–	0.178	0.914
ASD-Unlikely vs ASD-Probable	-0.152	-0.371	–	0.067	0.297
ASD-Possible vs ASD-Probable	-0.141	-0.356	–	0.073	0.297
age	0.001	-0.007	–	0.009	0.772
sex	0.077	-0.118	–	0.273	0.438
IQ	0.003	-0.003	–	0.009	0.319
beta_L
ASD-Unlikely vs ASD-Possible	0.005	-0.034	–	0.045	0.785
ASD-Unlikely vs ASD-Probable	-0.012	-0.058	–	0.034	0.785
ASD-Possible vs ASD-Probable	-0.018	-0.063	–	0.028	0.785
age	0	-0.001	–	0.002	0.728
sex	0	-0.041	–	0.041	0.989
IQ	0.001	-0.001	–	0.002	0.297
beta_SW
ASD-Unlikely vs ASD-Possible	-0.099	-0.267	–	0.07	0.251
ASD-Unlikely vs ASD-Probable	-0.254	-0.448	–	-0.06	0.031*
ASD-Possible vs ASD-Probable	-0.156	-0.346	–	0.036	0.167
age	0.002	-0.005	–	0.009	0.583
sex	0.139	-0.035	–	0.313	0.116
IQ	0.002	-0.003	–	0.007	0.399
gamma_C
ASD-Unlikely vs ASD-Possible	-0.026	-0.202	–	0.15	0.771
ASD-Unlikely vs ASD-Probable	-0.094	-0.3	–	0.114	0.762
ASD-Possible vs ASD-Probable	-0.068	-0.27	–	0.134	0.762
age	-0.001	-0.008	–	0.007	0.843
sex	0.014	-0.17	–	0.197	0.884
IQ	0,002	-0.004	–	0.008	0.47
gamma_L
ASD-Unlikely vs ASD-Possible	0.008	-0.033	–	0.049	0.704
ASD-Unlikely vs ASD-Probable	-0.031	-0.078	–	0.016	0.294
ASD-Possible vs ASD-Probable	-0.040	-0.086	–	0.008	0.294
age	0.001	-0.001	–	0.002	0.477
sex	0.009	-0.327	–	0.051	0.666
IQ	0.001	0	–	0.002	0.181
gamma_SW
ASD-Unlikely vs ASD-Possible	-0.083	-0.243	–	0.077	0.31
ASD-Unlikely vs ASD-Probable	-0.227	-0.412	–	-0.041	0.0498*
ASD-Possible vs ASD-Probable	-0.144	-0.325	–	0.038	0.182
age	0.005	-0.002	–	0.011	0.153
sex	0.09	-0.075	–	0.256	0.286
IQ	0.002	-0.003	–	0.007	0.479
* represents significant difference (p < 0.05), ** represents significant difference (p < 0.000). ASD, autism spectrum disorder; K-ABC, Kaufman Assessment Battery for Children.

## Sheet: TableS2
Supplementary Table 2. Group differences in graph metrics of threshold 10 to 30
Threshold	Frequencyband	index	vs	Coefficient	ll	ul	p
10	delta	C	ASD-Unlikely vs ASD-Possible	-0.102289	-0.435136	0.230559	0.547
10	delta	C	ASD-Unlikely vs ASD-Probable	-0.427816	-0.815929	-0.0397032	0.092
10	delta	C	ASD-Possible vs ASD-Probable	-0.325528	-0.699593	0.0485379	0.132
10	delta	L	ASD-Unlikely vs ASD-Possible	0.00883241	-0.0739935	0.0916583	0.834
10	delta	L	ASD-Unlikely vs ASD-Probable	-0.0797151	-0.175461	0.0160312	0.154
10	delta	L	ASD-Possible vs ASD-Probable	-0.0885475	-0.183031	0.00593621	0.154
10	delta	SW	ASD-Unlikely vs ASD-Possible	-0.249464	-0.538411	0.0394831	0.136
10	delta	SW	ASD-Unlikely vs ASD-Probable	-0.433452	-0.764963	-0.101941	0.031*
10	delta	SW	ASD-Possible vs ASD-Probable	-0.183988	-0.508043	0.140067	0.266
10	theta	C	ASD-Unlikely vs ASD-Possible	-0.0836471	-0.380014	0.21272	0.58
10	theta	C	ASD-Unlikely vs ASD-Probable	-0.409434	-0.752727	-0.0661406	0.058
10	theta	C	ASD-Possible vs ASD-Probable	-0.325787	-0.662455	0.0108814	0.087
10	theta	L	ASD-Unlikely vs ASD-Possible	0.0236156	-0.0595707	0.106802	0.578
10	theta	L	ASD-Unlikely vs ASD-Probable	-0.0569463	-0.153401	0.0395088	0.371
10	theta	L	ASD-Possible vs ASD-Probable	-0.0805619	-0.175666	0.0145422	0.291
10	theta	SW	ASD-Unlikely vs ASD-Possible	-0.214411	-0.470876	0.0420545	0.101
10	theta	SW	ASD-Unlikely vs ASD-Probable	-0.473045	-0.768432	-0.177659	0.005**
10	theta	SW	ASD-Possible vs ASD-Probable	-0.258634	-0.546539	0.0292703	0.101
10	alpha	C	ASD-Unlikely vs ASD-Possible	-0.0418333	-0.284321	0.200654	0.735
10	alpha	C	ASD-Unlikely vs ASD-Probable	-0.274944	-0.5545	0.00461219	0.144
10	alpha	C	ASD-Possible vs ASD-Probable	-0.233111	-0.507602	0.0413806	0.144
10	alpha	L	ASD-Unlikely vs ASD-Possible	0.0229578	-0.0667232	0.112639	0.616
10	alpha	L	ASD-Unlikely vs ASD-Probable	-0.0540967	-0.158528	0.0503348	0.465
10	alpha	L	ASD-Possible vs ASD-Probable	-0.0770544	-0.17999	0.0258814	0.427
10	alpha	SW	ASD-Unlikely vs ASD-Possible	-0.170453	-0.454869	0.113963	0.24
10	alpha	SW	ASD-Unlikely vs ASD-Probable	-0.410629	-0.733036	-0.0882213	0.038*
10	alpha	SW	ASD-Possible vs ASD-Probable	-0.240176	-0.554227	0.0738753	0.201
10	beta	C	ASD-Unlikely vs ASD-Possible	-0.079141	-0.380019	0.221737	0.606
10	beta	C	ASD-Unlikely vs ASD-Probable	-0.326813	-0.679249	0.0256236	0.207
10	beta	C	ASD-Possible vs ASD-Probable	-0.247672	-0.589538	0.0941942	0.233
10	beta	L	ASD-Unlikely vs ASD-Possible	0.0278788	-0.0664747	0.122232	0.563
10	beta	L	ASD-Unlikely vs ASD-Probable	-0.0836217	-0.193414	0.0261706	0.203
10	beta	L	ASD-Possible vs ASD-Probable	-0.1115	-0.219796	-0.00320469	0.131
10	beta	SW	ASD-Unlikely vs ASD-Possible	-0.262372	-0.569818	0.0450733	0.142
10	beta	SW	ASD-Unlikely vs ASD-Probable	-0.499899	-0.852435	-0.147363	0.016*
10	beta	SW	ASD-Possible vs ASD-Probable	-0.237527	-0.580108	0.105054	0.174
10	gamma	C	ASD-Unlikely vs ASD-Possible	-0.0950485	-0.37586	0.185763	0.659
10	gamma	C	ASD-Unlikely vs ASD-Probable	-0.167397	-0.49805	0.163257	0.659
10	gamma	C	ASD-Possible vs ASD-Probable	-0.0723481	-0.393257	0.248561	0.659
10	gamma	L	ASD-Unlikely vs ASD-Possible	0.0264693	-0.0636866	0.116625	0.565
10	gamma	L	ASD-Unlikely vs ASD-Probable	-0.0761797	-0.180881	0.0285213	0.231
10	gamma	L	ASD-Possible vs ASD-Probable	-0.102649	-0.205785	0.000486697	0.153
10	gamma	SW	ASD-Unlikely vs ASD-Possible	-0.231744	-0.526273	0.0627849	0.158
10	gamma	SW	ASD-Unlikely vs ASD-Probable	-0.472471	-0.81521	-0.129733	0.021*
10	gamma	SW	ASD-Possible vs ASD-Probable	-0.240727	-0.575008	0.0935536	0.158
12	delta	C	ASD-Unlikely vs ASD-Possible	-0.109247	-0.398535	0.180042	0.459
12	delta	C	ASD-Unlikely vs ASD-Probable	-0.400172	-0.737966	-0.0623771	0.061
12	delta	C	ASD-Possible vs ASD-Probable	-0.290925	-0.618876	0.0370265	0.123
12	delta	L	ASD-Unlikely vs ASD-Possible	0.00996189	-0.0770638	0.0969876	0.822
12	delta	L	ASD-Unlikely vs ASD-Probable	-0.0481313	-0.149204	0.0529417	0.526
12	delta	L	ASD-Possible vs ASD-Probable	-0.0580932	-0.157542	0.0413561	0.526
12	delta	SW	ASD-Unlikely vs ASD-Possible	-0.245881	-0.48018	-0.0115828	0.06
12	delta	SW	ASD-Unlikely vs ASD-Probable	-0.427476	-0.695609	-0.159344	0.005**
12	delta	SW	ASD-Possible vs ASD-Probable	-0.181595	-0.445289	0.0820986	0.177
12	theta	C	ASD-Unlikely vs ASD-Possible	-0.120068	-0.389918	0.149782	0.383
12	theta	C	ASD-Unlikely vs ASD-Probable	-0.38463	-0.697514	-0.0717452	0.048*
12	theta	C	ASD-Possible vs ASD-Probable	-0.264562	-0.571199	0.0420755	0.136
12	theta	L	ASD-Unlikely vs ASD-Possible	0.0191378	-0.0584603	0.0967359	0.629
12	theta	L	ASD-Unlikely vs ASD-Probable	-0.0379171	-0.128072	0.0522377	0.615
12	theta	L	ASD-Possible vs ASD-Probable	-0.0570549	-0.146122	0.0320118	0.615
12	theta	SW	ASD-Unlikely vs ASD-Possible	-0.20535	-0.437514	0.0268149	0.086
12	theta	SW	ASD-Unlikely vs ASD-Probable	-0.432337	-0.699015	-0.165659	0.004**
12	theta	SW	ASD-Possible vs ASD-Probable	-0.226987	-0.486136	0.0321609	0.086
12	alpha	C	ASD-Unlikely vs ASD-Possible	-0.0182889	-0.248326	0.211749	0.876
12	alpha	C	ASD-Unlikely vs ASD-Probable	-0.25163	-0.51799	0.0147303	0.121
12	alpha	C	ASD-Possible vs ASD-Probable	-0.233341	-0.49495	0.0282682	0.121
12	alpha	L	ASD-Unlikely vs ASD-Possible	0.00293849	-0.0684395	0.0743165	0.936
12	alpha	L	ASD-Unlikely vs ASD-Probable	-0.0480129	-0.131083	0.0350576	0.386
12	alpha	L	ASD-Possible vs ASD-Probable	-0.0509514	-0.132922	0.0310193	0.386
12	alpha	SW	ASD-Unlikely vs ASD-Possible	-0.112513	-0.370547	0.145521	0.393
12	alpha	SW	ASD-Unlikely vs ASD-Probable	-0.351246	-0.646196	-0.0562963	0.059
12	alpha	SW	ASD-Possible vs ASD-Probable	-0.238733	-0.526091	0.0486259	0.155
12	beta	C	ASD-Unlikely vs ASD-Possible	-0.0585586	-0.326045	0.208928	0.668
12	beta	C	ASD-Unlikely vs ASD-Probable	-0.286263	-0.599224	0.026698	0.214
12	beta	C	ASD-Possible vs ASD-Probable	-0.227704	-0.5324	0.0769912	0.214
12	beta	L	ASD-Unlikely vs ASD-Possible	0.0145769	-0.0650012	0.094155	0.72
12	beta	L	ASD-Unlikely vs ASD-Probable	-0.0643458	-0.15691	0.0282186	0.26
12	beta	L	ASD-Possible vs ASD-Probable	-0.0789227	-0.170245	0.0123999	0.26
12	beta	SW	ASD-Unlikely vs ASD-Possible	-0.224115	-0.483662	0.0354319	0.136
12	beta	SW	ASD-Unlikely vs ASD-Probable	-0.411243	-0.709189	-0.113296	0.020*
12	beta	SW	ASD-Possible vs ASD-Probable	-0.187128	-0.478289	0.104034	0.208
12	gamma	C	ASD-Unlikely vs ASD-Possible	-0.0616112	-0.319001	0.195779	0.787
12	gamma	C	ASD-Unlikely vs ASD-Probable	-0.102205	-0.403933	0.199523	0.787
12	gamma	C	ASD-Possible vs ASD-Probable	-0.0405935	-0.334818	0.253631	0.787
12	gamma	L	ASD-Unlikely vs ASD-Possible	0.0104794	-0.0665357	0.0874944	0.79
12	gamma	L	ASD-Unlikely vs ASD-Probable	-0.0183946	-0.107856	0.0710665	0.79
12	gamma	L	ASD-Possible vs ASD-Probable	-0.028874	-0.117035	0.059287	0.79
12	gamma	SW	ASD-Unlikely vs ASD-Possible	-0.185478	-0.446869	0.0759117	0.239
12	gamma	SW	ASD-Unlikely vs ASD-Probable	-0.363387	-0.666213	-0.060561	0.056
12	gamma	SW	ASD-Possible vs ASD-Probable	-0.177909	-0.473994	0.118177	0.239
14	delta	C	ASD-Unlikely vs ASD-Possible	-0.0789239	-0.337493	0.179645	0.55
14	delta	C	ASD-Unlikely vs ASD-Probable	-0.351652	-0.653511	-0.0497924	0.067
14	delta	C	ASD-Possible vs ASD-Probable	-0.272728	-0.566142	0.0206855	0.103
14	delta	L	ASD-Unlikely vs ASD-Possible	0.0348673	-0.0570832	0.126818	0.648
14	delta	L	ASD-Unlikely vs ASD-Probable	-0.0249459	-0.13202	0.0821281	0.648
14	delta	L	ASD-Possible vs ASD-Probable	-0.0598132	-0.165359	0.0457323	0.648
14	delta	SW	ASD-Unlikely vs ASD-Possible	-0.185511	-0.387596	0.0165745	0.108
14	delta	SW	ASD-Unlikely vs ASD-Probable	-0.368	-0.599676	-0.136324	0.006**
14	delta	SW	ASD-Possible vs ASD-Probable	-0.18249	-0.410224	0.0452449	0.116
14	theta	C	ASD-Unlikely vs ASD-Possible	-0.0764061	-0.321468	0.168656	0.541
14	theta	C	ASD-Unlikely vs ASD-Probable	-0.305647	-0.589605	-0.0216901	0.105
14	theta	C	ASD-Possible vs ASD-Probable	-0.229241	-0.507834	0.0493515	0.16
14	theta	L	ASD-Unlikely vs ASD-Possible	0.0148558	-0.0594299	0.0891414	0.695
14	theta	L	ASD-Unlikely vs ASD-Probable	-0.0193729	-0.105636	0.0668902	0.695
14	theta	L	ASD-Possible vs ASD-Probable	-0.0342286	-0.119521	0.0510642	0.695
14	theta	SW	ASD-Unlikely vs ASD-Possible	-0.157091	-0.363589	0.0494079	0.136
14	theta	SW	ASD-Unlikely vs ASD-Probable	-0.359867	-0.596607	-0.123126	0.009**
14	theta	SW	ASD-Possible vs ASD-Probable	-0.202776	-0.433648	0.0280964	0.128
14	alpha	C	ASD-Unlikely vs ASD-Possible	0.00131075	-0.204457	0.207079	0.99
14	alpha	C	ASD-Unlikely vs ASD-Probable	-0.205397	-0.444245	0.0334504	0.138
14	alpha	C	ASD-Possible vs ASD-Probable	-0.206708	-0.440933	0.0275168	0.138
14	alpha	L	ASD-Unlikely vs ASD-Possible	0.000200082	-0.0587706	0.0591707	0.995
14	alpha	L	ASD-Unlikely vs ASD-Probable	-0.0369099	-0.105458	0.0316384	0.437
14	alpha	L	ASD-Possible vs ASD-Probable	-0.0371099	-0.1048	0.0305801	0.437
14	alpha	SW	ASD-Unlikely vs ASD-Possible	-0.0857953	-0.308139	0.136548	0.449
14	alpha	SW	ASD-Unlikely vs ASD-Probable	-0.292571	-0.547891	-0.0372513	0.074
14	alpha	SW	ASD-Possible vs ASD-Probable	-0.206776	-0.455633	0.0420804	0.155
14	beta	C	ASD-Unlikely vs ASD-Possible	-0.0489826	-0.290179	0.192214	0.691
14	beta	C	ASD-Unlikely vs ASD-Probable	-0.234164	-0.516206	0.0478781	0.281
14	beta	C	ASD-Possible vs ASD-Probable	-0.185181	-0.460536	0.0901737	0.281
14	beta	L	ASD-Unlikely vs ASD-Possible	0.00790463	-0.0586231	0.0744324	0.816
14	beta	L	ASD-Unlikely vs ASD-Probable	-0.0314621	-0.108864	0.0459401	0.638
14	beta	L	ASD-Possible vs ASD-Probable	-0.0393668	-0.115728	0.036994	0.638
14	beta	SW	ASD-Unlikely vs ASD-Possible	-0.170194	-0.405803	0.0654144	0.172
14	beta	SW	ASD-Unlikely vs ASD-Probable	-0.355682	-0.627219	-0.0841456	0.031*
14	beta	SW	ASD-Possible vs ASD-Probable	-0.185488	-0.451387	0.0804112	0.172
14	gamma	C	ASD-Unlikely vs ASD-Possible	-0.0521862	-0.279985	0.175612	0.877
14	gamma	C	ASD-Unlikely vs ASD-Probable	-0.0727278	-0.338848	0.193393	0.877
14	gamma	C	ASD-Possible vs ASD-Probable	-0.0205416	-0.280706	0.239623	0.877
14	gamma	L	ASD-Unlikely vs ASD-Possible	0.0177983	-0.0408037	0.0764003	0.552
14	gamma	L	ASD-Unlikely vs ASD-Probable	-0.0295687	-0.097526	0.0383886	0.552
14	gamma	L	ASD-Possible vs ASD-Probable	-0.047367	-0.114519	0.0197848	0.5
14	gamma	SW	ASD-Unlikely vs ASD-Possible	-0.151467	-0.375	0.0720661	0.217
14	gamma	SW	ASD-Unlikely vs ASD-Probable	-0.31145	-0.57044	-0.0524598	0.055
14	gamma	SW	ASD-Possible vs ASD-Probable	-0.159983	-0.413847	0.0938819	0.217
16	delta	C	ASD-Unlikely vs ASD-Possible	-0.0536152	-0.288473	0.181243	0.655
16	delta	C	ASD-Unlikely vs ASD-Probable	-0.310351	-0.584008	-0.0366948	0.079
16	delta	C	ASD-Possible vs ASD-Probable	-0.256736	-0.523725	0.0102526	0.089
16	delta	L	ASD-Unlikely vs ASD-Possible	0.0294497	-0.048683	0.107583	0.69
16	delta	L	ASD-Unlikely vs ASD-Probable	-0.0164911	-0.107544	0.0745616	0.723
16	delta	L	ASD-Possible vs ASD-Probable	-0.0459409	-0.135774	0.0438918	0.69
16	delta	SW	ASD-Unlikely vs ASD-Possible	-0.174026	-0.348428	0.000376108	0.076
16	delta	SW	ASD-Unlikely vs ASD-Probable	-0.345628	-0.545347	-0.145909	0.002**
16	delta	SW	ASD-Possible vs ASD-Probable	-0.171602	-0.368552	0.0253479	0.088
16	theta	C	ASD-Unlikely vs ASD-Possible	-0.05777	-0.288705	0.173165	0.624
16	theta	C	ASD-Unlikely vs ASD-Probable	-0.271079	-0.538195	-0.00396293	0.14
16	theta	C	ASD-Possible vs ASD-Probable	-0.213309	-0.475827	0.0492089	0.167
16	theta	L	ASD-Unlikely vs ASD-Possible	-0.00258133	-0.0673218	0.0621591	0.938
16	theta	L	ASD-Unlikely vs ASD-Probable	-0.0308351	-0.106013	0.0443424	0.684
16	theta	L	ASD-Possible vs ASD-Probable	-0.0282537	-0.102568	0.0460605	0.684
16	theta	SW	ASD-Unlikely vs ASD-Possible	-0.125891	-0.316648	0.0648672	0.196
16	theta	SW	ASD-Unlikely vs ASD-Probable	-0.311601	-0.530408	-0.0927942	0.016*
16	theta	SW	ASD-Possible vs ASD-Probable	-0.18571	-0.399624	0.0282035	0.133
16	alpha	C	ASD-Unlikely vs ASD-Possible	0.019855	-0.174742	0.214452	0.841
16	alpha	C	ASD-Unlikely vs ASD-Probable	-0.164048	-0.390011	0.0619141	0.232
16	alpha	C	ASD-Possible vs ASD-Probable	-0.183903	-0.405572	0.0377657	0.232
16	alpha	L	ASD-Unlikely vs ASD-Possible	-7.12928e-05	-0.0497272	0.0495847	0.998
16	alpha	L	ASD-Unlikely vs ASD-Probable	-0.0284553	-0.0861535	0.029243	0.501
16	alpha	L	ASD-Possible vs ASD-Probable	-0.028384	-0.0853954	0.0286274	0.501
16	alpha	SW	ASD-Unlikely vs ASD-Possible	-0.066941	-0.267605	0.133723	0.513
16	alpha	SW	ASD-Unlikely vs ASD-Probable	-0.249695	-0.480561	-0.0188291	0.102
16	alpha	SW	ASD-Possible vs ASD-Probable	-0.182754	-0.407894	0.042386	0.167
16	beta	C	ASD-Unlikely vs ASD-Possible	-0.0201756	-0.247533	0.207182	0.862
16	beta	C	ASD-Unlikely vs ASD-Probable	-0.188182	-0.453583	0.0772195	0.306
16	beta	C	ASD-Possible vs ASD-Probable	-0.168006	-0.427235	0.091223	0.306
16	beta	L	ASD-Unlikely vs ASD-Possible	0.011902	-0.0431789	0.0669829	0.672
16	beta	L	ASD-Unlikely vs ASD-Probable	-0.0189075	-0.0829064	0.0450914	0.672
16	beta	L	ASD-Possible vs ASD-Probable	-0.0308095	-0.0939815	0.0323625	0.672
16	beta	SW	ASD-Unlikely vs ASD-Possible	-0.1331	-0.343068	0.0768667	0.214
16	beta	SW	ASD-Unlikely vs ASD-Probable	-0.302912	-0.545354	-0.0604707	0.043*
16	beta	SW	ASD-Possible vs ASD-Probable	-0.169812	-0.407557	0.067934	0.214
16	gamma	C	ASD-Unlikely vs ASD-Possible	-0.0316877	-0.235795	0.17242	0.81
16	gamma	C	ASD-Unlikely vs ASD-Probable	-0.0602971	-0.298899	0.178305	0.81
16	gamma	C	ASD-Possible vs ASD-Probable	-0.0286094	-0.261927	0.204708	0.81
16	gamma	L	ASD-Unlikely vs ASD-Possible	0.012875	-0.0405987	0.0663488	0.637
16	gamma	L	ASD-Unlikely vs ASD-Probable	-0.031844	-0.0938403	0.0301522	0.471
16	gamma	L	ASD-Possible vs ASD-Probable	-0.0447191	-0.106081	0.016643	0.46
16	gamma	SW	ASD-Unlikely vs ASD-Possible	-0.111871	-0.307149	0.0834071	0.262
16	gamma	SW	ASD-Unlikely vs ASD-Probable	-0.242812	-0.468956	-0.016667	0.106
16	gamma	SW	ASD-Possible vs ASD-Probable	-0.130941	-0.35236	0.0904782	0.262
18	delta	C	ASD-Unlikely vs ASD-Possible	-0.051826	-0.272089	0.168437	0.645
18	delta	C	ASD-Unlikely vs ASD-Probable	-0.280097	-0.536808	-0.0233857	0.097
18	delta	C	ASD-Possible vs ASD-Probable	-0.228271	-0.479183	0.0226414	0.112
18	delta	L	ASD-Unlikely vs ASD-Possible	0.0160199	-0.0485066	0.0805464	0.892
18	delta	L	ASD-Unlikely vs ASD-Probable	-0.00521303	-0.0803501	0.069924	0.892
18	delta	L	ASD-Possible vs ASD-Probable	-0.0212329	-0.0954254	0.0529595	0.892
18	delta	SW	ASD-Unlikely vs ASD-Possible	-0.156985	-0.313192	-0.000777851	0.069
18	delta	SW	ASD-Unlikely vs ASD-Probable	-0.320829	-0.500035	-0.141624	0.001**
18	delta	SW	ASD-Possible vs ASD-Probable	-0.163844	-0.340525	0.0128361	0.069
18	theta	C	ASD-Unlikely vs ASD-Possible	-0.0354206	-0.248698	0.177857	0.745
18	theta	C	ASD-Unlikely vs ASD-Probable	-0.215299	-0.462631	0.0320324	0.221
18	theta	C	ASD-Possible vs ASD-Probable	-0.179879	-0.423217	0.0634589	0.221
18	theta	L	ASD-Unlikely vs ASD-Possible	0.000486042	-0.0551686	0.0561407	0.986
18	theta	L	ASD-Unlikely vs ASD-Probable	-0.029223	-0.093854	0.0354081	0.563
18	theta	L	ASD-Possible vs ASD-Probable	-0.029709	-0.0936262	0.0342082	0.563
18	theta	SW	ASD-Unlikely vs ASD-Possible	-0.0933003	-0.261131	0.0745304	0.276
18	theta	SW	ASD-Unlikely vs ASD-Probable	-0.255702	-0.448613	-0.0627923	0.028*
18	theta	SW	ASD-Possible vs ASD-Probable	-0.162402	-0.351529	0.0267249	0.139
18	alpha	C	ASD-Unlikely vs ASD-Possible	0.0129482	-0.16775	0.193646	0.888
18	alpha	C	ASD-Unlikely vs ASD-Probable	-0.156454	-0.366179	0.0532712	0.216
18	alpha	C	ASD-Possible vs ASD-Probable	-0.169402	-0.375343	0.0365389	0.216
18	alpha	L	ASD-Unlikely vs ASD-Possible	-0.00787067	-0.0581168	0.0423755	0.759
18	alpha	L	ASD-Unlikely vs ASD-Probable	-0.0322365	-0.0905844	0.0261115	0.611
18	alpha	L	ASD-Possible vs ASD-Probable	-0.0243658	-0.0820204	0.0332888	0.611
18	alpha	SW	ASD-Unlikely vs ASD-Possible	-0.0544158	-0.238501	0.129669	0.562
18	alpha	SW	ASD-Unlikely vs ASD-Probable	-0.207851	-0.420162	0.00445974	0.165
18	alpha	SW	ASD-Possible vs ASD-Probable	-0.153435	-0.360888	0.0540178	0.221
18	beta	C	ASD-Unlikely vs ASD-Possible	-0.0206344	-0.225402	0.184134	0.843
18	beta	C	ASD-Unlikely vs ASD-Probable	-0.176154	-0.414744	0.062436	0.289
18	beta	C	ASD-Possible vs ASD-Probable	-0.15552	-0.389406	0.0783659	0.289
18	beta	L	ASD-Unlikely vs ASD-Possible	0.00701497	-0.0412317	0.0552617	0.776
18	beta	L	ASD-Unlikely vs ASD-Probable	-0.0175417	-0.0735953	0.0385119	0.776
18	beta	L	ASD-Possible vs ASD-Probable	-0.0245567	-0.0799001	0.0307868	0.776
18	beta	SW	ASD-Unlikely vs ASD-Possible	-0.115846	-0.298342	0.0666493	0.213
18	beta	SW	ASD-Unlikely vs ASD-Probable	-0.270111	-0.480775	-0.059448	0.036*
18	beta	SW	ASD-Possible vs ASD-Probable	-0.154265	-0.361334	0.0528034	0.213
18	gamma	C	ASD-Unlikely vs ASD-Possible	-0.0107515	-0.201754	0.180251	0.912
18	gamma	C	ASD-Unlikely vs ASD-Probable	-0.0744097	-0.297744	0.148924	0.852
18	gamma	C	ASD-Possible vs ASD-Probable	-0.0636582	-0.282159	0.154842	0.852
18	gamma	L	ASD-Unlikely vs ASD-Possible	0.0117125	-0.0324694	0.0558943	0.603
18	gamma	L	ASD-Unlikely vs ASD-Probable	-0.0275107	-0.0787615	0.02374	0.439
18	gamma	L	ASD-Possible vs ASD-Probable	-0.0392232	-0.0899638	0.0115174	0.389
18	gamma	SW	ASD-Unlikely vs ASD-Possible	-0.0793118	-0.256566	0.097942	0.38
18	gamma	SW	ASD-Unlikely vs ASD-Probable	-0.226993	-0.43273	-0.021256	0.092
18	gamma	SW	ASD-Possible vs ASD-Probable	-0.147681	-0.349131	0.0537689	0.226
20	delta	C	ASD-Unlikely vs ASD-Possible	-0.0435898	-0.247552	0.160372	0.675
20	delta	C	ASD-Unlikely vs ASD-Probable	-0.270744	-0.508243	-0.0332448	0.076
20	delta	C	ASD-Possible vs ASD-Probable	-0.227154	-0.459662	0.00535325	0.083
20	delta	L	ASD-Unlikely vs ASD-Possible	0.0153505	-0.0369371	0.067638	0.781
20	delta	L	ASD-Unlikely vs ASD-Probable	-0.00863605	-0.0694666	0.0521945	0.781
20	delta	L	ASD-Possible vs ASD-Probable	-0.0239865	-0.0840938	0.0361208	0.781
20	delta	SW	ASD-Unlikely vs ASD-Possible	-0.146435	-0.288774	-0.00409577	0.044*
20	delta	SW	ASD-Unlikely vs ASD-Probable	-0.321894	-0.485455	-0.158333	0.000**
20	delta	SW	ASD-Possible vs ASD-Probable	-0.175459	-0.33668	-0.0142385	0.044*
20	theta	C	ASD-Unlikely vs ASD-Possible	-0.0355679	-0.226621	0.155485	0.715
20	theta	C	ASD-Unlikely vs ASD-Probable	-0.211086	-0.432657	0.0104849	0.172
20	theta	C	ASD-Possible vs ASD-Probable	-0.175518	-0.393753	0.0427161	0.172
20	theta	L	ASD-Unlikely vs ASD-Possible	0.000493698	-0.047401	0.0483883	0.984
20	theta	L	ASD-Unlikely vs ASD-Probable	-0.0234553	-0.0790884	0.0321777	0.613
20	theta	L	ASD-Possible vs ASD-Probable	-0.023949	-0.0790015	0.0311035	0.613
20	theta	SW	ASD-Unlikely vs ASD-Possible	-0.0849242	-0.235828	0.0659799	0.27
20	theta	SW	ASD-Unlikely vs ASD-Probable	-0.256595	-0.430186	-0.0830037	0.011*
20	theta	SW	ASD-Possible vs ASD-Probable	-0.17167	-0.342044	-0.00129708	0.072
20	alpha	C	ASD-Unlikely vs ASD-Possible	0.0217012	-0.144281	0.187684	0.798
20	alpha	C	ASD-Unlikely vs ASD-Probable	-0.134696	-0.327303	0.0579112	0.256
20	alpha	C	ASD-Possible vs ASD-Probable	-0.156397	-0.34576	0.0329659	0.256
20	alpha	L	ASD-Unlikely vs ASD-Possible	-0.000868569	-0.0429116	0.0411744	0.968
20	alpha	L	ASD-Unlikely vs ASD-Probable	-0.0216949	-0.070517	0.0271272	0.597
20	alpha	L	ASD-Possible vs ASD-Probable	-0.0208263	-0.0690953	0.0274427	0.597
20	alpha	SW	ASD-Unlikely vs ASD-Possible	-0.0388966	-0.205817	0.128024	0.648
20	alpha	SW	ASD-Unlikely vs ASD-Probable	-0.183757	-0.376285	0.00877021	0.184
20	alpha	SW	ASD-Possible vs ASD-Probable	-0.144861	-0.333422	0.0437002	0.198
20	beta	C	ASD-Unlikely vs ASD-Possible	-0.0103673	-0.198713	0.177978	0.914
20	beta	C	ASD-Unlikely vs ASD-Probable	-0.151628	-0.370674	0.0674177	0.296
20	beta	C	ASD-Possible vs ASD-Probable	-0.141261	-0.35618	0.0736577	0.296
20	beta	L	ASD-Unlikely vs ASD-Possible	0.00549697	-0.034074	0.0450679	0.785
20	beta	L	ASD-Unlikely vs ASD-Probable	-0.0122433	-0.058241	0.0337545	0.785
20	beta	L	ASD-Possible vs ASD-Probable	-0.0177402	-0.0631903	0.0277098	0.785
20	beta	SW	ASD-Unlikely vs ASD-Possible	-0.0987569	-0.267234	0.0697202	0.251
20	beta	SW	ASD-Unlikely vs ASD-Probable	-0.254031	-0.448201	-0.0598616	0.031*
20	beta	SW	ASD-Possible vs ASD-Probable	-0.155275	-0.346272	0.035723	0.167
20	gamma	C	ASD-Unlikely vs ASD-Possible	-0.0262075	-0.202385	0.14997	0.771
20	gamma	C	ASD-Unlikely vs ASD-Probable	-0.0943312	-0.300075	0.111413	0.762
20	gamma	C	ASD-Possible vs ASD-Probable	-0.0681237	-0.269864	0.133617	0.762
20	gamma	L	ASD-Unlikely vs ASD-Possible	0.0078699	-0.0327693	0.0485092	0.704
20	gamma	L	ASD-Unlikely vs ASD-Probable	-0.0311269	-0.0782882	0.0160343	0.294
20	gamma	L	ASD-Possible vs ASD-Probable	-0.0389968	-0.0856833	0.00768965	0.294
20	gamma	SW	ASD-Unlikely vs ASD-Possible	-0.0829868	-0.242906	0.0769328	0.309
20	gamma	SW	ASD-Unlikely vs ASD-Probable	-0.226698	-0.412175	-0.0412213	0.05
20	gamma	SW	ASD-Possible vs ASD-Probable	-0.143712	-0.325378	0.0379544	0.182
22	delta	C	ASD-Unlikely vs ASD-Possible	-0.038807	-0.227597	0.149983	0.687
22	delta	C	ASD-Unlikely vs ASD-Probable	-0.233642	-0.453437	-0.0138464	0.112
22	delta	C	ASD-Possible vs ASD-Probable	-0.194835	-0.410114	0.0204451	0.114
22	delta	L	ASD-Unlikely vs ASD-Possible	0.0114079	-0.0327946	0.0556104	0.695
22	delta	L	ASD-Unlikely vs ASD-Probable	-0.0102874	-0.0616816	0.0411068	0.695
22	delta	L	ASD-Possible vs ASD-Probable	-0.0216953	-0.0725052	0.0291147	0.695
22	delta	SW	ASD-Unlikely vs ASD-Possible	-0.124049	-0.249329	0.00123009	0.052
22	delta	SW	ASD-Unlikely vs ASD-Probable	-0.265454	-0.409625	-0.121283	0.001**
22	delta	SW	ASD-Possible vs ASD-Probable	-0.141405	-0.28351	0.000700861	0.052
22	theta	C	ASD-Unlikely vs ASD-Possible	-0.0333685	-0.209617	0.14288	0.711
22	theta	C	ASD-Unlikely vs ASD-Probable	-0.186781	-0.391049	0.0174868	0.203
22	theta	C	ASD-Possible vs ASD-Probable	-0.153413	-0.354787	0.0479618	0.203
22	theta	L	ASD-Unlikely vs ASD-Possible	0.00515448	-0.0352973	0.0456063	0.803
22	theta	L	ASD-Unlikely vs ASD-Probable	-0.0164719	-0.0634557	0.030512	0.738
22	theta	L	ASD-Possible vs ASD-Probable	-0.0216263	-0.0681319	0.0248792	0.738
22	theta	SW	ASD-Unlikely vs ASD-Possible	-0.0747813	-0.20667	0.057107	0.266
22	theta	SW	ASD-Unlikely vs ASD-Probable	-0.222418	-0.374167	-0.0706691	0.012*
22	theta	SW	ASD-Possible vs ASD-Probable	-0.147637	-0.296871	0.00159721	0.079
22	alpha	C	ASD-Unlikely vs ASD-Possible	0.0109747	-0.143441	0.16539	0.889
22	alpha	C	ASD-Unlikely vs ASD-Probable	-0.129343	-0.308579	0.0498924	0.236
22	alpha	C	ASD-Possible vs ASD-Probable	-0.140318	-0.316742	0.0361057	0.236
22	alpha	L	ASD-Unlikely vs ASD-Possible	-0.00197812	-0.0392205	0.0352643	0.917
22	alpha	L	ASD-Unlikely vs ASD-Probable	-0.0227818	-0.0660355	0.020472	0.511
22	alpha	L	ASD-Possible vs ASD-Probable	-0.0208036	-0.0635931	0.0219858	0.511
22	alpha	SW	ASD-Unlikely vs ASD-Possible	-0.0351964	-0.183253	0.112861	0.641
22	alpha	SW	ASD-Unlikely vs ASD-Probable	-0.148225	-0.319135	0.0226847	0.267
22	alpha	SW	ASD-Possible vs ASD-Probable	-0.113029	-0.280517	0.0544588	0.279
22	beta	C	ASD-Unlikely vs ASD-Possible	-0.0137314	-0.186202	0.158739	0.876
22	beta	C	ASD-Unlikely vs ASD-Probable	-0.134832	-0.335377	0.0657133	0.343
22	beta	C	ASD-Possible vs ASD-Probable	-0.121101	-0.318216	0.0760149	0.343
22	beta	L	ASD-Unlikely vs ASD-Possible	0.0104628	-0.0233294	0.0442551	0.68
22	beta	L	ASD-Unlikely vs ASD-Probable	-0.00826727	-0.0475263	0.0309918	0.68
22	beta	L	ASD-Possible vs ASD-Probable	-0.0187301	-0.0575508	0.0200905	0.68
22	beta	SW	ASD-Unlikely vs ASD-Possible	-0.0799322	-0.226471	0.0666067	0.285
22	beta	SW	ASD-Unlikely vs ASD-Probable	-0.208283	-0.377531	-0.0390346	0.048*
22	beta	SW	ASD-Possible vs ASD-Probable	-0.128351	-0.294824	0.0381226	0.196
22	gamma	C	ASD-Unlikely vs ASD-Possible	-0.0234673	-0.186132	0.139198	0.777
22	gamma	C	ASD-Unlikely vs ASD-Probable	-0.0902205	-0.280291	0.0998505	0.725
22	gamma	C	ASD-Possible vs ASD-Probable	-0.0667532	-0.253393	0.119887	0.725
22	gamma	L	ASD-Unlikely vs ASD-Possible	0.0109397	-0.0213681	0.0432476	0.507
22	gamma	L	ASD-Unlikely vs ASD-Probable	-0.02221	-0.0597222	0.0153021	0.369
22	gamma	L	ASD-Possible vs ASD-Probable	-0.0331498	-0.0702925	0.00399291	0.241
22	gamma	SW	ASD-Unlikely vs ASD-Possible	-0.0614652	-0.20054	0.0776095	0.386
22	gamma	SW	ASD-Unlikely vs ASD-Probable	-0.18578	-0.347079	-0.0244817	0.072
22	gamma	SW	ASD-Possible vs ASD-Probable	-0.124315	-0.28266	0.0340301	0.186
24	delta	C	ASD-Unlikely vs ASD-Possible	-0.03329	-0.205582	0.139002	0.705
24	delta	C	ASD-Unlikely vs ASD-Probable	-0.206829	-0.407428	-0.00623008	0.126
24	delta	C	ASD-Possible vs ASD-Probable	-0.173539	-0.37025	0.0231713	0.126
24	delta	L	ASD-Unlikely vs ASD-Possible	0.010856	-0.0278577	0.0495698	0.657
24	delta	L	ASD-Unlikely vs ASD-Probable	-0.0102006	-0.0552187	0.0348174	0.657
24	delta	L	ASD-Possible vs ASD-Probable	-0.0210566	-0.0655789	0.0234656	0.657
24	delta	SW	ASD-Unlikely vs ASD-Possible	-0.110828	-0.223815	0.00216001	0.063
24	delta	SW	ASD-Unlikely vs ASD-Probable	-0.232385	-0.362594	-0.102175	0.001**
24	delta	SW	ASD-Possible vs ASD-Probable	-0.121557	-0.249896	0.00678123	0.063
24	theta	C	ASD-Unlikely vs ASD-Possible	-0.0282905	-0.186379	0.129798	0.726
24	theta	C	ASD-Unlikely vs ASD-Probable	-0.17143	-0.354877	0.0120164	0.181
24	theta	C	ASD-Possible vs ASD-Probable	-0.14314	-0.323953	0.0376735	0.181
24	theta	L	ASD-Unlikely vs ASD-Possible	0.00784312	-0.0267558	0.042442	0.657
24	theta	L	ASD-Unlikely vs ASD-Probable	-0.0108496	-0.0510115	0.0293122	0.657
24	theta	L	ASD-Possible vs ASD-Probable	-0.0186928	-0.058458	0.0210724	0.657
24	theta	SW	ASD-Unlikely vs ASD-Possible	-0.0657259	-0.182851	0.0513989	0.271
24	theta	SW	ASD-Unlikely vs ASD-Probable	-0.196331	-0.331377	-0.0612844	0.013*
24	theta	SW	ASD-Possible vs ASD-Probable	-0.130605	-0.263434	0.00222438	0.081
24	alpha	C	ASD-Unlikely vs ASD-Possible	0.0105832	-0.133298	0.154465	0.885
24	alpha	C	ASD-Unlikely vs ASD-Probable	-0.114562	-0.281476	0.0523527	0.268
24	alpha	C	ASD-Possible vs ASD-Probable	-0.125145	-0.289664	0.0393737	0.268
24	alpha	L	ASD-Unlikely vs ASD-Possible	0.00121441	-0.0310316	0.0334605	0.941
24	alpha	L	ASD-Unlikely vs ASD-Probable	-0.0176714	-0.0551282	0.0197853	0.533
24	alpha	L	ASD-Possible vs ASD-Probable	-0.0188858	-0.0559517	0.01818	0.533
24	alpha	SW	ASD-Unlikely vs ASD-Possible	-0.0300633	-0.163743	0.103617	0.659
24	alpha	SW	ASD-Unlikely vs ASD-Probable	-0.13132	-0.285755	0.0231155	0.286
24	alpha	SW	ASD-Possible vs ASD-Probable	-0.101256	-0.252896	0.0503838	0.286
24	beta	C	ASD-Unlikely vs ASD-Possible	-0.0121602	-0.1681	0.14378	0.879
24	beta	C	ASD-Unlikely vs ASD-Probable	-0.125687	-0.306757	0.0553824	0.318
24	beta	C	ASD-Possible vs ASD-Probable	-0.113527	-0.291775	0.0647211	0.318
24	beta	L	ASD-Unlikely vs ASD-Possible	0.00808831	-0.0210576	0.0372343	0.721
24	beta	L	ASD-Unlikely vs ASD-Probable	-0.00615665	-0.0400086	0.0276954	0.721
24	beta	L	ASD-Possible vs ASD-Probable	-0.014245	-0.0477295	0.0192396	0.721
24	beta	SW	ASD-Unlikely vs ASD-Possible	-0.0660037	-0.198479	0.0664718	0.329
24	beta	SW	ASD-Unlikely vs ASD-Probable	-0.185144	-0.338239	-0.0320481	0.053
24	beta	SW	ASD-Possible vs ASD-Probable	-0.11914	-0.269779	0.0314985	0.182
24	gamma	C	ASD-Unlikely vs ASD-Possible	-0.027421	-0.177788	0.122946	0.721
24	gamma	C	ASD-Unlikely vs ASD-Probable	-0.0853432	-0.260874	0.0901877	0.721
24	gamma	C	ASD-Possible vs ASD-Probable	-0.0579222	-0.230418	0.114573	0.721
24	gamma	L	ASD-Unlikely vs ASD-Possible	0.0113067	-0.0168883	0.0395017	0.432
24	gamma	L	ASD-Unlikely vs ASD-Probable	-0.0182888	-0.0510198	0.0144421	0.41
24	gamma	L	ASD-Possible vs ASD-Probable	-0.0295955	-0.0620198	0.0028289	0.221
24	gamma	SW	ASD-Unlikely vs ASD-Possible	-0.060382	-0.184402	0.0636381	0.34
24	gamma	SW	ASD-Unlikely vs ASD-Probable	-0.160566	-0.304425	-0.0167077	0.086
24	gamma	SW	ASD-Possible vs ASD-Probable	-0.100184	-0.241514	0.0411453	0.247
26	delta	C	ASD-Unlikely vs ASD-Possible	-0.0238873	-0.184517	0.136742	0.771
26	delta	C	ASD-Unlikely vs ASD-Probable	-0.182929	-0.369939	0.00408107	0.134
26	delta	C	ASD-Possible vs ASD-Probable	-0.159042	-0.342588	0.0245046	0.134
26	delta	L	ASD-Unlikely vs ASD-Possible	0.00810243	-0.0248107	0.0410156	0.724
26	delta	L	ASD-Unlikely vs ASD-Probable	-0.00688681	-0.0451376	0.031364	0.724
26	delta	L	ASD-Possible vs ASD-Probable	-0.0149892	-0.052825	0.0228466	0.724
26	delta	SW	ASD-Unlikely vs ASD-Possible	-0.0944007	-0.197088	0.0082868	0.072
26	delta	SW	ASD-Unlikely vs ASD-Probable	-0.214482	-0.332861	-0.0961034	0.001**
26	delta	SW	ASD-Possible vs ASD-Probable	-0.120081	-0.236809	-0.00335414	0.066
26	theta	C	ASD-Unlikely vs ASD-Possible	-0.0265134	-0.172201	0.119174	0.721
26	theta	C	ASD-Unlikely vs ASD-Probable	-0.160624	-0.32964	0.00839167	0.173
26	theta	C	ASD-Possible vs ASD-Probable	-0.134111	-0.300903	0.0326814	0.173
26	theta	L	ASD-Unlikely vs ASD-Possible	0.00690027	-0.023363	0.0371636	0.655
26	theta	L	ASD-Unlikely vs ASD-Probable	-0.00970232	-0.0448313	0.0254267	0.655
26	theta	L	ASD-Possible vs ASD-Probable	-0.0166026	-0.051389	0.0181838	0.655
26	theta	SW	ASD-Unlikely vs ASD-Possible	-0.0631537	-0.170393	0.0440851	0.248
26	theta	SW	ASD-Unlikely vs ASD-Probable	-0.180456	-0.304211	-0.0567	0.013*
26	theta	SW	ASD-Possible vs ASD-Probable	-0.117302	-0.239107	0.00450322	0.089
26	alpha	C	ASD-Unlikely vs ASD-Possible	0.00490302	-0.127474	0.13728	0.942
26	alpha	C	ASD-Unlikely vs ASD-Probable	-0.112219	-0.265809	0.0413723	0.228
26	alpha	C	ASD-Possible vs ASD-Probable	-0.117122	-0.268686	0.0344426	0.228
26	alpha	L	ASD-Unlikely vs ASD-Possible	0.0018254	-0.0251301	0.0287809	0.894
26	alpha	L	ASD-Unlikely vs ASD-Probable	-0.0180174	-0.0493157	0.0132808	0.389
26	alpha	L	ASD-Possible vs ASD-Probable	-0.0198428	-0.0508279	0.0111423	0.389
26	alpha	SW	ASD-Unlikely vs ASD-Possible	-0.0355674	-0.158145	0.0870103	0.57
26	alpha	SW	ASD-Unlikely vs ASD-Probable	-0.119065	-0.260837	0.022707	0.299
26	alpha	SW	ASD-Possible vs ASD-Probable	-0.0834975	-0.222736	0.0557412	0.36
26	beta	C	ASD-Unlikely vs ASD-Possible	0.00430347	-0.138513	0.14712	0.953
26	beta	C	ASD-Unlikely vs ASD-Probable	-0.109412	-0.275188	0.0563647	0.294
26	beta	C	ASD-Possible vs ASD-Probable	-0.113715	-0.277111	0.0496811	0.294
26	beta	L	ASD-Unlikely vs ASD-Possible	0.00909876	-0.0151574	0.033355	0.693
26	beta	L	ASD-Unlikely vs ASD-Probable	-0.00461768	-0.0327808	0.0235454	0.748
26	beta	L	ASD-Possible vs ASD-Probable	-0.0137164	-0.0415908	0.0141579	0.693
26	beta	SW	ASD-Unlikely vs ASD-Possible	-0.0458021	-0.165722	0.0741172	0.454
26	beta	SW	ASD-Unlikely vs ASD-Probable	-0.160423	-0.299034	-0.0218108	0.07
26	beta	SW	ASD-Possible vs ASD-Probable	-0.11462	-0.251109	0.0218682	0.15
26	gamma	C	ASD-Unlikely vs ASD-Possible	-0.0184707	-0.158801	0.12186	0.796
26	gamma	C	ASD-Unlikely vs ASD-Probable	-0.0702298	-0.234156	0.0936965	0.793
26	gamma	C	ASD-Possible vs ASD-Probable	-0.0517591	-0.212693	0.109175	0.793
26	gamma	L	ASD-Unlikely vs ASD-Possible	0.0103044	-0.0142355	0.0348444	0.411
26	gamma	L	ASD-Unlikely vs ASD-Probable	-0.0129226	-0.0414142	0.015569	0.411
26	gamma	L	ASD-Possible vs ASD-Probable	-0.023227	-0.0514515	0.00499745	0.32
26	gamma	SW	ASD-Unlikely vs ASD-Possible	-0.0554557	-0.167805	0.0568936	0.333
26	gamma	SW	ASD-Unlikely vs ASD-Probable	-0.142873	-0.273354	-0.0123912	0.096
26	gamma	SW	ASD-Possible vs ASD-Probable	-0.0874169	-0.215515	0.0406816	0.272
28	delta	C	ASD-Unlikely vs ASD-Possible	-0.0229986	-0.167688	0.121691	0.755
28	delta	C	ASD-Unlikely vs ASD-Probable	-0.165244	-0.333641	0.00315305	0.138
28	delta	C	ASD-Possible vs ASD-Probable	-0.142246	-0.307719	0.0232282	0.138
28	delta	L	ASD-Unlikely vs ASD-Possible	0.00705977	-0.0202619	0.0343814	0.666
28	delta	L	ASD-Unlikely vs ASD-Probable	-0.00699828	-0.0387413	0.0247447	0.666
28	delta	L	ASD-Possible vs ASD-Probable	-0.0140581	-0.0454708	0.0173547	0.666
28	delta	SW	ASD-Unlikely vs ASD-Possible	-0.0841358	-0.176209	0.00793713	0.073
28	delta	SW	ASD-Unlikely vs ASD-Probable	-0.190358	-0.296604	-0.084112	0.001**
28	delta	SW	ASD-Possible vs ASD-Probable	-0.106222	-0.21099	-0.00145375	0.07
28	theta	C	ASD-Unlikely vs ASD-Possible	-0.0221806	-0.156363	0.112002	0.746
28	theta	C	ASD-Unlikely vs ASD-Probable	-0.137061	-0.292803	0.0186815	0.215
28	theta	C	ASD-Possible vs ASD-Probable	-0.11488	-0.268703	0.0389422	0.215
28	theta	L	ASD-Unlikely vs ASD-Possible	0.00724547	-0.018313	0.032804	0.602
28	theta	L	ASD-Unlikely vs ASD-Probable	-0.00790126	-0.0375653	0.0217628	0.602
28	theta	L	ASD-Possible vs ASD-Probable	-0.0151467	-0.0445243	0.0142308	0.602
28	theta	SW	ASD-Unlikely vs ASD-Possible	-0.0541919	-0.151379	0.0429956	0.274
28	theta	SW	ASD-Unlikely vs ASD-Probable	-0.159593	-0.271882	-0.0473034	0.016*
28	theta	SW	ASD-Possible vs ASD-Probable	-0.105401	-0.216038	0.00523714	0.093
28	alpha	C	ASD-Unlikely vs ASD-Possible	0.00714821	-0.115859	0.130155	0.909
28	alpha	C	ASD-Unlikely vs ASD-Probable	-0.101689	-0.244468	0.0410891	0.244
28	alpha	C	ASD-Possible vs ASD-Probable	-0.108837	-0.249787	0.0321125	0.244
28	alpha	L	ASD-Unlikely vs ASD-Possible	0.00541852	-0.0162355	0.0270726	0.624
28	alpha	L	ASD-Unlikely vs ASD-Probable	-0.0124925	-0.037631	0.012646	0.495
28	alpha	L	ASD-Possible vs ASD-Probable	-0.017911	-0.042797	0.00697495	0.475
28	alpha	SW	ASD-Unlikely vs ASD-Possible	-0.0382229	-0.14953	0.0730843	0.501
28	alpha	SW	ASD-Unlikely vs ASD-Probable	-0.104942	-0.233782	0.0238985	0.331
28	alpha	SW	ASD-Possible vs ASD-Probable	-0.0667189	-0.193383	0.0599454	0.453
28	beta	C	ASD-Unlikely vs ASD-Possible	0.0108604	-0.121696	0.143416	0.872
28	beta	C	ASD-Unlikely vs ASD-Probable	-0.0936413	-0.247496	0.0602131	0.349
28	beta	C	ASD-Possible vs ASD-Probable	-0.104502	-0.256287	0.0472837	0.349
28	beta	L	ASD-Unlikely vs ASD-Possible	0.00724234	-0.0129228	0.0274074	0.616
28	beta	L	ASD-Unlikely vs ASD-Probable	-0.00599294	-0.0293965	0.0174106	0.616
28	beta	L	ASD-Possible vs ASD-Probable	-0.0132353	-0.0364064	0.00993588	0.616
28	beta	SW	ASD-Unlikely vs ASD-Possible	-0.0369246	-0.146145	0.0722955	0.508
28	beta	SW	ASD-Unlikely vs ASD-Probable	-0.144568	-0.270919	-0.0182174	0.075
28	beta	SW	ASD-Possible vs ASD-Probable	-0.107643	-0.232135	0.0168478	0.135
28	gamma	C	ASD-Unlikely vs ASD-Possible	-0.0159134	-0.144101	0.112274	0.808
28	gamma	C	ASD-Unlikely vs ASD-Probable	-0.0565762	-0.206157	0.0930045	0.808
28	gamma	C	ASD-Possible vs ASD-Probable	-0.0406628	-0.187723	0.106397	0.808
28	gamma	L	ASD-Unlikely vs ASD-Possible	0.00491638	-0.0158759	0.0257087	0.643
28	gamma	L	ASD-Unlikely vs ASD-Probable	-0.0113198	-0.0354584	0.0128188	0.537
28	gamma	L	ASD-Possible vs ASD-Probable	-0.0162362	-0.0401465	0.00767421	0.537
28	gamma	SW	ASD-Unlikely vs ASD-Possible	-0.0453284	-0.145188	0.0545315	0.374
28	gamma	SW	ASD-Unlikely vs ASD-Probable	-0.114646	-0.230557	0.00126433	0.158
28	gamma	SW	ASD-Possible vs ASD-Probable	-0.069318	-0.183277	0.0446405	0.35
30	delta	C	ASD-Unlikely vs ASD-Possible	-0.0189629	-0.150297	0.112371	0.777
30	delta	C	ASD-Unlikely vs ASD-Probable	-0.145193	-0.298066	0.00768033	0.15
30	delta	C	ASD-Possible vs ASD-Probable	-0.12623	-0.276506	0.0240464	0.15
30	delta	L	ASD-Unlikely vs ASD-Possible	0.00755398	-0.016012	0.0311199	0.706
30	delta	L	ASD-Unlikely vs ASD-Probable	-0.00526944	-0.0326401	0.0221012	0.706
30	delta	L	ASD-Possible vs ASD-Probable	-0.0128234	-0.039915	0.0142682	0.706
30	delta	SW	ASD-Unlikely vs ASD-Possible	-0.0803096	-0.163518	0.00289913	0.069
30	delta	SW	ASD-Unlikely vs ASD-Probable	-0.168156	-0.264272	-0.0720404	0.002**
30	delta	SW	ASD-Possible vs ASD-Probable	-0.0878464	-0.182655	0.00696177	0.069
30	theta	C	ASD-Unlikely vs ASD-Possible	-0.018404	-0.142153	0.105345	0.771
30	theta	C	ASD-Unlikely vs ASD-Probable	-0.127321	-0.271005	0.0163638	0.199
30	theta	C	ASD-Possible vs ASD-Probable	-0.108917	-0.25084	0.0330068	0.199
30	theta	L	ASD-Unlikely vs ASD-Possible	0.00678447	-0.0147989	0.0283679	0.668
30	theta	L	ASD-Unlikely vs ASD-Probable	-0.00547774	-0.0305325	0.0195771	0.668
30	theta	L	ASD-Possible vs ASD-Probable	-0.0122622	-0.0370756	0.0125511	0.668
30	theta	SW	ASD-Unlikely vs ASD-Possible	-0.0478845	-0.136678	0.0409091	0.291
30	theta	SW	ASD-Unlikely vs ASD-Probable	-0.143748	-0.246355	-0.0411417	0.018*
30	theta	SW	ASD-Possible vs ASD-Probable	-0.0958636	-0.197	0.00527292	0.095
30	alpha	C	ASD-Unlikely vs ASD-Possible	0.0042232	-0.109407	0.117854	0.942
30	alpha	C	ASD-Unlikely vs ASD-Probable	-0.097362	-0.229194	0.0344703	0.222
30	alpha	C	ASD-Possible vs ASD-Probable	-0.101585	-0.231783	0.0286129	0.222
30	alpha	L	ASD-Unlikely vs ASD-Possible	0.00416486	-0.0145964	0.0229261	0.663
30	alpha	L	ASD-Unlikely vs ASD-Probable	-0.00955923	-0.0313358	0.0122173	0.584
30	alpha	L	ASD-Possible vs ASD-Probable	-0.0137241	-0.0352859	0.00783774	0.584
30	alpha	SW	ASD-Unlikely vs ASD-Possible	-0.0367638	-0.137796	0.0642686	0.476
30	alpha	SW	ASD-Unlikely vs ASD-Probable	-0.0957343	-0.212698	0.0212293	0.326
30	alpha	SW	ASD-Possible vs ASD-Probable	-0.0589705	-0.174044	0.0561029	0.473
30	beta	C	ASD-Unlikely vs ASD-Possible	0.0117405	-0.10995	0.133431	0.85
30	beta	C	ASD-Unlikely vs ASD-Probable	-0.0845844	-0.225844	0.0566755	0.361
30	beta	C	ASD-Possible vs ASD-Probable	-0.0963249	-0.235767	0.0431168	0.361
30	beta	L	ASD-Unlikely vs ASD-Possible	0.00734928	-0.00976718	0.0244657	0.6
30	beta	L	ASD-Unlikely vs ASD-Probable	-0.00364345	-0.0235068	0.0162199	0.719
30	beta	L	ASD-Possible vs ASD-Probable	-0.0109927	-0.0306642	0.00867872	0.6
30	beta	SW	ASD-Unlikely vs ASD-Possible	-0.0320808	-0.130022	0.0658604	0.521
30	beta	SW	ASD-Unlikely vs ASD-Probable	-0.127352	-0.240701	-0.0140022	0.083
30	beta	SW	ASD-Possible vs ASD-Probable	-0.0952711	-0.207005	0.0164626	0.142
30	gamma	C	ASD-Unlikely vs ASD-Possible	-0.0255753	-0.143302	0.0921514	0.676
30	gamma	C	ASD-Unlikely vs ASD-Probable	-0.054357	-0.191656	0.0829422	0.676
30	gamma	C	ASD-Possible vs ASD-Probable	-0.0287818	-0.163846	0.106282	0.676
30	gamma	L	ASD-Unlikely vs ASD-Possible	0.0051304	-0.0122824	0.0225432	0.564
30	gamma	L	ASD-Unlikely vs ASD-Probable	-0.00752787	-0.0277356	0.0126798	0.564
30	gamma	L	ASD-Possible vs ASD-Probable	-0.0126583	-0.0326789	0.00736238	0.564
30	gamma	SW	ASD-Unlikely vs ASD-Possible	-0.0493539	-0.138259	0.0395516	0.277
30	gamma	SW	ASD-Unlikely vs ASD-Probable	-0.108148	-0.211335	-0.00496154	0.12
30	gamma	SW	ASD-Possible vs ASD-Probable	-0.0587946	-0.16034	0.0427504	0.277
* represents significant difference (p < 0.05), ** represents significant difference (p < 0.01). ASD, autism spectrum disorder; C, clustering coefficient; L, path length; SW, small-worldness.

## Sheet: TableS3
Supplementary Table 3. Group differences in node-level graph metrics
Threshold	Frequencyband	Graph metric	Brain region	Comparison	Coefficient	95 % CI			p
12	delta	ncc	bankssts L	ASD-Unlikely vs ASD-Possible	0.0706757	-0.578206	–	0.719557	0.907
12	delta	ncc	bankssts L	ASD-Unlikely vs ASD-Probable	-0.204134	-0.935567	–	0.527298	0.811
12	delta	ncc	bankssts L	ASD-Possible vs ASD-Probable	-0.27481	-0.979324	–	0.429704	0.703
12	delta	ncc	bankssts R	ASD-Unlikely vs ASD-Possible	-0.248924	-0.873025	–	0.375176	0.698
12	delta	ncc	bankssts R	ASD-Unlikely vs ASD-Probable	-0.507076	-1.23111	–	0.216957	0.437
12	delta	ncc	bankssts R	ASD-Possible vs ASD-Probable	-0.258152	-0.918286	–	0.401982	0.703
12	delta	ncc	caudal anterior cingulate L	ASD-Unlikely vs ASD-Possible	-0.460217	-1.04769	–	0.12726	0.38
12	delta	ncc	caudal anterior cingulate L	ASD-Unlikely vs ASD-Probable	-1.31913	-2.02788	–	-0.610391	0.030*
12	delta	ncc	caudal anterior cingulate L	ASD-Possible vs ASD-Probable	-0.858916	-1.51721	–	-0.200627	0.143
12	delta	ncc	caudal anterior cingulate R	ASD-Unlikely vs ASD-Possible	-0.472498	-1.00665	–	0.0616529	0.304
12	delta	ncc	caudal anterior cingulate R	ASD-Unlikely vs ASD-Probable	-0.976448	-1.66348	–	-0.289414	0.093
12	delta	ncc	caudal anterior cingulate R	ASD-Possible vs ASD-Probable	-0.50395	-1.18079	–	0.172891	0.408
12	delta	ncc	caudal middle frontal L	ASD-Unlikely vs ASD-Possible	-0.0749397	-0.811699	–	0.661819	0.91
12	delta	ncc	caudal middle frontal L	ASD-Unlikely vs ASD-Probable	-0.586138	-1.41801	–	0.245733	0.437
12	delta	ncc	caudal middle frontal L	ASD-Possible vs ASD-Probable	-0.511199	-1.34174	–	0.31934	0.522
12	delta	ncc	caudal middle frontal R	ASD-Unlikely vs ASD-Possible	0.214547	-0.439222	–	0.868316	0.771
12	delta	ncc	caudal middle frontal R	ASD-Unlikely vs ASD-Probable	-0.177071	-0.972602	–	0.618459	0.837
12	delta	ncc	caudal middle frontal R	ASD-Possible vs ASD-Probable	-0.391618	-1.14152	–	0.358283	0.589
12	delta	ncc	cuneus L	ASD-Unlikely vs ASD-Possible	-0.0619709	-0.53594	–	0.411998	0.894
12	delta	ncc	cuneus L	ASD-Unlikely vs ASD-Probable	-0.620725	-1.17364	–	-0.0678063	0.249
12	delta	ncc	cuneus L	ASD-Possible vs ASD-Probable	-0.558754	-1.11079	–	-0.00671629	0.251
12	delta	ncc	cuneus R	ASD-Unlikely vs ASD-Possible	-0.292116	-0.799818	–	0.215585	0.557
12	delta	ncc	cuneus R	ASD-Unlikely vs ASD-Probable	-0.970702	-1.57405	–	-0.367358	0.077
12	delta	ncc	cuneus R	ASD-Possible vs ASD-Probable	-0.678586	-1.27696	–	-0.0802079	0.249
12	delta	ncc	entorhinal L	ASD-Unlikely vs ASD-Possible	0.262822	-0.0958621	–	0.621506	0.413
12	delta	ncc	entorhinal L	ASD-Unlikely vs ASD-Probable	-0.0412311	-0.462202	–	0.37974	0.91
12	delta	ncc	entorhinal L	ASD-Possible vs ASD-Probable	-0.304053	-0.720065	–	0.111959	0.413
12	delta	ncc	entorhinal R	ASD-Unlikely vs ASD-Possible	-0.157197	-0.503655	–	0.18926	0.66
12	delta	ncc	entorhinal R	ASD-Unlikely vs ASD-Probable	-0.425313	-0.829618	–	-0.0210083	0.251
12	delta	ncc	entorhinal R	ASD-Possible vs ASD-Probable	-0.268116	-0.666213	–	0.129981	0.459
12	delta	ncc	frontal pole L	ASD-Unlikely vs ASD-Possible	-0.0866802	-0.620624	–	0.447263	0.893
12	delta	ncc	frontal pole L	ASD-Unlikely vs ASD-Probable	-0.23302	-0.863701	–	0.397662	0.729
12	delta	ncc	frontal pole L	ASD-Possible vs ASD-Probable	-0.14634	-0.748938	–	0.456259	0.829
12	delta	ncc	frontal pole R	ASD-Unlikely vs ASD-Possible	-0.427961	-0.894459	–	0.0385375	0.304
12	delta	ncc	frontal pole R	ASD-Unlikely vs ASD-Probable	-0.964048	-1.50973	–	-0.418368	0.036*
12	delta	ncc	frontal pole R	ASD-Possible vs ASD-Probable	-0.536088	-1.06837	–	-0.00380354	0.251
12	delta	ncc	fusiform L	ASD-Unlikely vs ASD-Possible	0.0555511	-0.369007	–	0.480109	0.894
12	delta	ncc	fusiform L	ASD-Unlikely vs ASD-Probable	-0.0265286	-0.521187	–	0.468129	0.955
12	delta	ncc	fusiform L	ASD-Possible vs ASD-Probable	-0.0820797	-0.555747	–	0.391588	0.891
12	delta	ncc	fusiform R	ASD-Unlikely vs ASD-Possible	0.0127188	-0.449632	–	0.47507	0.981
12	delta	ncc	fusiform R	ASD-Unlikely vs ASD-Probable	-0.860278	-1.4127	–	-0.307856	0.077
12	delta	ncc	fusiform R	ASD-Possible vs ASD-Probable	-0.872996	-1.42487	–	-0.321127	0.077
12	delta	ncc	inferior parietal L	ASD-Unlikely vs ASD-Possible	-0.352169	-0.981082	–	0.276744	0.57
12	delta	ncc	inferior parietal L	ASD-Unlikely vs ASD-Probable	-0.701904	-1.40296	–	-0.000851212	0.251
12	delta	ncc	inferior parietal L	ASD-Possible vs ASD-Probable	-0.349735	-1.07713	–	0.377657	0.619
12	delta	ncc	inferior parietal R	ASD-Unlikely vs ASD-Possible	-0.527464	-0.986909	–	-0.0680181	0.249
12	delta	ncc	inferior parietal R	ASD-Unlikely vs ASD-Probable	-0.556403	-1.10402	–	-0.00878191	0.251
12	delta	ncc	inferior parietal R	ASD-Possible vs ASD-Probable	-0.0289393	-0.578463	–	0.520584	0.955
12	delta	ncc	inferior temporal L	ASD-Unlikely vs ASD-Possible	-0.0568129	-0.619375	–	0.505749	0.91
12	delta	ncc	inferior temporal L	ASD-Unlikely vs ASD-Probable	-0.277904	-0.937932	–	0.382124	0.673
12	delta	ncc	inferior temporal L	ASD-Possible vs ASD-Probable	-0.221091	-0.859821	–	0.417639	0.751
12	delta	ncc	inferior temporal R	ASD-Unlikely vs ASD-Possible	0.179672	-0.312418	–	0.671763	0.729
12	delta	ncc	inferior temporal R	ASD-Unlikely vs ASD-Probable	-0.386395	-0.954655	–	0.181866	0.459
12	delta	ncc	inferior temporal R	ASD-Possible vs ASD-Probable	-0.566067	-1.1217	–	-0.0104351	0.251
12	delta	ncc	insula L	ASD-Unlikely vs ASD-Possible	-0.205371	-0.630227	–	0.219484	0.619
12	delta	ncc	insula L	ASD-Unlikely vs ASD-Probable	-0.708767	-1.23211	–	-0.185427	0.119
12	delta	ncc	insula L	ASD-Possible vs ASD-Probable	-0.503396	-0.997158	–	-0.00963484	0.251
12	delta	ncc	insula R	ASD-Unlikely vs ASD-Possible	0.138446	-0.25845	–	0.535343	0.751
12	delta	ncc	insula R	ASD-Unlikely vs ASD-Probable	-0.228159	-0.69802	–	0.241702	0.619
12	delta	ncc	insula R	ASD-Possible vs ASD-Probable	-0.366605	-0.823989	–	0.0907783	0.364
12	delta	ncc	isthmus cingulate L	ASD-Unlikely vs ASD-Possible	0.264252	-0.134489	–	0.662993	0.466
12	delta	ncc	isthmus cingulate L	ASD-Unlikely vs ASD-Probable	0.117482	-0.355259	–	0.590223	0.824
12	delta	ncc	isthmus cingulate L	ASD-Possible vs ASD-Probable	-0.14677	-0.595227	–	0.301687	0.771
12	delta	ncc	isthmus cingulate R	ASD-Unlikely vs ASD-Possible	0.0712697	-0.375313	–	0.517853	0.893
12	delta	ncc	isthmus cingulate R	ASD-Unlikely vs ASD-Probable	-0.302244	-0.813902	–	0.209415	0.536
12	delta	ncc	isthmus cingulate R	ASD-Possible vs ASD-Probable	-0.373513	-0.876854	–	0.129827	0.408
12	delta	ncc	lateral occipital L	ASD-Unlikely vs ASD-Possible	-0.106495	-0.621579	–	0.408589	0.858
12	delta	ncc	lateral occipital L	ASD-Unlikely vs ASD-Probable	-0.188983	-0.773005	–	0.395039	0.772
12	delta	ncc	lateral occipital L	ASD-Possible vs ASD-Probable	-0.0824876	-0.644783	–	0.479808	0.893
12	delta	ncc	lateral occipital R	ASD-Unlikely vs ASD-Possible	-0.559408	-1.20583	–	0.0870164	0.304
12	delta	ncc	lateral occipital R	ASD-Unlikely vs ASD-Probable	-0.195215	-0.962988	–	0.572559	0.824
12	delta	ncc	lateral occipital R	ASD-Possible vs ASD-Probable	0.364193	-0.363758	–	1.09214	0.612
12	delta	ncc	lateral orbitofrontal L	ASD-Unlikely vs ASD-Possible	-0.114766	-0.50391	–	0.274378	0.804
12	delta	ncc	lateral orbitofrontal L	ASD-Unlikely vs ASD-Probable	-0.349888	-0.803562	–	0.103786	0.388
12	delta	ncc	lateral orbitofrontal L	ASD-Possible vs ASD-Probable	-0.235122	-0.6759	–	0.205656	0.584
12	delta	ncc	lateral orbitofrontal R	ASD-Unlikely vs ASD-Possible	0.171058	-0.151344	–	0.49346	0.584
12	delta	ncc	lateral orbitofrontal R	ASD-Unlikely vs ASD-Probable	-0.132533	-0.518387	–	0.253322	0.751
12	delta	ncc	lateral orbitofrontal R	ASD-Possible vs ASD-Probable	-0.303591	-0.681526	–	0.0743446	0.364
12	delta	ncc	lingual L	ASD-Unlikely vs ASD-Possible	0.0077918	-0.422343	–	0.437927	0.986
12	delta	ncc	lingual L	ASD-Unlikely vs ASD-Probable	-0.131159	-0.629283	–	0.366964	0.824
12	delta	ncc	lingual L	ASD-Possible vs ASD-Probable	-0.138951	-0.629335	–	0.351432	0.809
12	delta	ncc	lingual R	ASD-Unlikely vs ASD-Possible	-0.106513	-0.531102	–	0.318076	0.824
12	delta	ncc	lingual R	ASD-Unlikely vs ASD-Probable	-0.370844	-0.857722	–	0.116033	0.395
12	delta	ncc	lingual R	ASD-Possible vs ASD-Probable	-0.264332	-0.73995	–	0.211287	0.57
12	delta	ncc	medial orbitofrontal L	ASD-Unlikely vs ASD-Possible	-0.0577746	-0.449747	–	0.334197	0.893
12	delta	ncc	medial orbitofrontal L	ASD-Unlikely vs ASD-Probable	-0.251681	-0.703252	–	0.199891	0.57
12	delta	ncc	medial orbitofrontal L	ASD-Possible vs ASD-Probable	-0.193906	-0.632504	–	0.244692	0.661
12	delta	ncc	medial orbitofrontal R	ASD-Unlikely vs ASD-Possible	0.0416665	-0.305602	–	0.388935	0.907
12	delta	ncc	medial orbitofrontal R	ASD-Unlikely vs ASD-Probable	0.0111619	-0.391448	–	0.413772	0.981
12	delta	ncc	medial orbitofrontal R	ASD-Possible vs ASD-Probable	-0.0305046	-0.424247	–	0.363238	0.939
12	delta	ncc	middle temporal L	ASD-Unlikely vs ASD-Possible	-0.084793	-0.560848	–	0.391262	0.888
12	delta	ncc	middle temporal L	ASD-Unlikely vs ASD-Probable	-0.554761	-1.14088	–	0.0313552	0.288
12	delta	ncc	middle temporal L	ASD-Possible vs ASD-Probable	-0.469968	-1.01005	–	0.0701166	0.304
12	delta	ncc	middle temporal R	ASD-Unlikely vs ASD-Possible	0.0557432	-0.450879	–	0.562365	0.907
12	delta	ncc	middle temporal R	ASD-Unlikely vs ASD-Probable	-0.868182	-1.48099	–	-0.255375	0.093
12	delta	ncc	middle temporal R	ASD-Possible vs ASD-Probable	-0.923925	-1.53219	–	-0.315661	0.084
12	delta	ncc	paracentral L	ASD-Unlikely vs ASD-Possible	-0.42177	-0.885472	–	0.0419327	0.304
12	delta	ncc	paracentral L	ASD-Unlikely vs ASD-Probable	-0.386469	-0.940028	–	0.16709	0.437
12	delta	ncc	paracentral L	ASD-Possible vs ASD-Probable	0.0353008	-0.49769	–	0.568292	0.953
12	delta	ncc	paracentral R	ASD-Unlikely vs ASD-Possible	-0.693327	-1.20729	–	-0.179359	0.119
12	delta	ncc	paracentral R	ASD-Unlikely vs ASD-Probable	-0.537249	-1.14509	–	0.0705919	0.304
12	delta	ncc	paracentral R	ASD-Possible vs ASD-Probable	0.156078	-0.428241	–	0.740397	0.822
12	delta	ncc	parahippocampal L	ASD-Unlikely vs ASD-Possible	0.000972784	-0.445124	–	0.44707	0.998
12	delta	ncc	parahippocampal L	ASD-Unlikely vs ASD-Probable	-0.545391	-1.07383	–	-0.0169527	0.251
12	delta	ncc	parahippocampal L	ASD-Possible vs ASD-Probable	-0.546364	-1.06887	–	-0.0238633	0.251
12	delta	ncc	parahippocampal R	ASD-Unlikely vs ASD-Possible	0.071508	-0.381087	–	0.524103	0.893
12	delta	ncc	parahippocampal R	ASD-Unlikely vs ASD-Probable	-0.21108	-0.738744	–	0.316584	0.698
12	delta	ncc	parahippocampal R	ASD-Possible vs ASD-Probable	-0.282588	-0.808029	–	0.242853	0.584
12	delta	ncc	pars opercularis L	ASD-Unlikely vs ASD-Possible	-0.497904	-1.05462	–	0.05881	0.304
12	delta	ncc	pars opercularis L	ASD-Unlikely vs ASD-Probable	-0.650471	-1.29301	–	-0.00792756	0.251
12	delta	ncc	pars opercularis L	ASD-Possible vs ASD-Probable	-0.152567	-0.789149	–	0.484015	0.83
12	delta	ncc	pars opercularis R	ASD-Unlikely vs ASD-Possible	-0.0318216	-0.537004	–	0.473361	0.953
12	delta	ncc	pars opercularis R	ASD-Unlikely vs ASD-Probable	-0.137117	-0.717095	–	0.442862	0.83
12	delta	ncc	pars opercularis R	ASD-Possible vs ASD-Probable	-0.105295	-0.682882	–	0.472292	0.886
12	delta	ncc	pars orbitalis L	ASD-Unlikely vs ASD-Possible	-0.453039	-0.907095	–	0.00101744	0.251
12	delta	ncc	pars orbitalis L	ASD-Unlikely vs ASD-Probable	-0.673889	-1.22408	–	-0.123696	0.196
12	delta	ncc	pars orbitalis L	ASD-Possible vs ASD-Probable	-0.220851	-0.739483	–	0.297781	0.67
12	delta	ncc	pars orbitalis R	ASD-Unlikely vs ASD-Possible	0.0511418	-0.33213	–	0.434413	0.894
12	delta	ncc	pars orbitalis R	ASD-Unlikely vs ASD-Probable	-0.321608	-0.772851	–	0.129635	0.43
12	delta	ncc	pars orbitalis R	ASD-Possible vs ASD-Probable	-0.37275	-0.812454	–	0.0669543	0.318
12	delta	ncc	pars triangularis L	ASD-Unlikely vs ASD-Possible	-0.0109405	-0.527188	–	0.505307	0.986
12	delta	ncc	pars triangularis L	ASD-Unlikely vs ASD-Probable	-0.521446	-1.12371	–	0.080816	0.304
12	delta	ncc	pars triangularis L	ASD-Possible vs ASD-Probable	-0.510505	-1.08859	–	0.0675815	0.304
12	delta	ncc	pars triangularis R	ASD-Unlikely vs ASD-Possible	0.071157	-0.410348	–	0.552662	0.893
12	delta	ncc	pars triangularis R	ASD-Unlikely vs ASD-Probable	-0.2327	-0.795788	–	0.330388	0.682
12	delta	ncc	pars triangularis R	ASD-Possible vs ASD-Probable	-0.303857	-0.851755	–	0.244041	0.57
12	delta	ncc	pericalcarine L	ASD-Unlikely vs ASD-Possible	-0.188995	-0.618968	–	0.240978	0.661
12	delta	ncc	pericalcarine L	ASD-Unlikely vs ASD-Probable	-0.244309	-0.729951	–	0.241334	0.612
12	delta	ncc	pericalcarine L	ASD-Possible vs ASD-Probable	-0.0553135	-0.530307	–	0.41968	0.907
12	delta	ncc	pericalcarine R	ASD-Unlikely vs ASD-Possible	-0.266416	-0.717184	–	0.184351	0.536
12	delta	ncc	pericalcarine R	ASD-Unlikely vs ASD-Probable	-0.493021	-1.01817	–	0.0321267	0.292
12	delta	ncc	pericalcarine R	ASD-Possible vs ASD-Probable	-0.226605	-0.736223	–	0.283012	0.661
12	delta	ncc	postcentral L	ASD-Unlikely vs ASD-Possible	-0.133687	-0.737962	–	0.470587	0.837
12	delta	ncc	postcentral L	ASD-Unlikely vs ASD-Probable	-0.591996	-1.36086	–	0.176873	0.388
12	delta	ncc	postcentral L	ASD-Possible vs ASD-Probable	-0.458308	-1.16062	–	0.244006	0.477
12	delta	ncc	postcentral R	ASD-Unlikely vs ASD-Possible	-0.478053	-1.02404	–	0.0679345	0.304
12	delta	ncc	postcentral R	ASD-Unlikely vs ASD-Probable	-0.388688	-1.03675	–	0.259375	0.532
12	delta	ncc	postcentral R	ASD-Possible vs ASD-Probable	0.0893651	-0.534252	–	0.712982	0.893
12	delta	ncc	posterior cingulate L	ASD-Unlikely vs ASD-Possible	-0.413284	-1.06283	–	0.236261	0.498
12	delta	ncc	posterior cingulate L	ASD-Unlikely vs ASD-Probable	-0.583881	-1.3694	–	0.20164	0.408
12	delta	ncc	posterior cingulate L	ASD-Possible vs ASD-Probable	-0.170597	-0.906043	–	0.564849	0.833
12	delta	ncc	posterior cingulate R	ASD-Unlikely vs ASD-Possible	-0.255118	-0.819218	–	0.308982	0.66
12	delta	ncc	posterior cingulate R	ASD-Unlikely vs ASD-Probable	-0.418899	-1.09475	–	0.25695	0.52
12	delta	ncc	posterior cingulate R	ASD-Possible vs ASD-Probable	-0.163781	-0.82147	–	0.493908	0.824
12	delta	ncc	precentral L	ASD-Unlikely vs ASD-Possible	0.165726	-0.412697	–	0.744148	0.808
12	delta	ncc	precentral L	ASD-Unlikely vs ASD-Probable	-0.716067	-1.42886	–	-0.00327598	0.251
12	delta	ncc	precentral L	ASD-Possible vs ASD-Probable	-0.881793	-1.57262	–	-0.190961	0.158
12	delta	ncc	precentral R	ASD-Unlikely vs ASD-Possible	-0.444828	-0.953953	–	0.0642977	0.304
12	delta	ncc	precentral R	ASD-Unlikely vs ASD-Probable	-0.558358	-1.18206	–	0.0653432	0.304
12	delta	ncc	precentral R	ASD-Possible vs ASD-Probable	-0.113531	-0.717679	–	0.490618	0.881
12	delta	ncc	precuneus L	ASD-Unlikely vs ASD-Possible	-0.377404	-0.750918	–	-0.00388978	0.251
12	delta	ncc	precuneus L	ASD-Unlikely vs ASD-Probable	-0.786041	-1.21162	–	-0.360463	0.030*
12	delta	ncc	precuneus L	ASD-Possible vs ASD-Probable	-0.408637	-0.83143	–	0.0141565	0.276
12	delta	ncc	precuneus R	ASD-Unlikely vs ASD-Possible	-0.20981	-0.702382	–	0.282762	0.67
12	delta	ncc	precuneus R	ASD-Unlikely vs ASD-Probable	-0.616448	-1.17138	–	-0.0615197	0.249
12	delta	ncc	precuneus R	ASD-Possible vs ASD-Probable	-0.406638	-0.97476	–	0.161484	0.43
12	delta	ncc	rostral anterior cingulate L	ASD-Unlikely vs ASD-Possible	0.123397	-0.29011	–	0.536905	0.803
12	delta	ncc	rostral anterior cingulate L	ASD-Unlikely vs ASD-Probable	-0.282867	-0.75313	–	0.187396	0.532
12	delta	ncc	rostral anterior cingulate L	ASD-Possible vs ASD-Probable	-0.406265	-0.857727	–	0.0451982	0.304
12	delta	ncc	rostral anterior cingulate R	ASD-Unlikely vs ASD-Possible	-0.000647139	-0.418647	–	0.417353	0.998
12	delta	ncc	rostral anterior cingulate R	ASD-Unlikely vs ASD-Probable	-0.526231	-1.01741	–	-0.0350549	0.251
12	delta	ncc	rostral anterior cingulate R	ASD-Possible vs ASD-Probable	-0.525584	-1.00159	–	-0.0495831	0.249
12	delta	ncc	rostral middle frontal L	ASD-Unlikely vs ASD-Possible	-0.344794	-0.97326	–	0.283672	0.57
12	delta	ncc	rostral middle frontal L	ASD-Unlikely vs ASD-Probable	-0.949282	-1.76397	–	-0.134593	0.249
12	delta	ncc	rostral middle frontal L	ASD-Possible vs ASD-Probable	-0.604488	-1.36177	–	0.152792	0.364
12	delta	ncc	rostral middle frontal R	ASD-Unlikely vs ASD-Possible	-0.00859641	-0.698064	–	0.680871	0.99
12	delta	ncc	rostral middle frontal R	ASD-Unlikely vs ASD-Probable	-0.384479	-1.16892	–	0.399958	0.619
12	delta	ncc	rostral middle frontal R	ASD-Possible vs ASD-Probable	-0.375883	-1.10016	–	0.348391	0.589
12	delta	ncc	superior frontal L	ASD-Unlikely vs ASD-Possible	-0.535606	-1.07562	–	0.00440486	0.252
12	delta	ncc	superior frontal L	ASD-Unlikely vs ASD-Probable	0.0815593	-0.539496	–	0.702615	0.894
12	delta	ncc	superior frontal L	ASD-Possible vs ASD-Probable	0.617165	-0.0303749	–	1.26471	0.286
12	delta	ncc	superior frontal R	ASD-Unlikely vs ASD-Possible	0.0922314	-0.458036	–	0.642498	0.893
12	delta	ncc	superior frontal R	ASD-Unlikely vs ASD-Probable	-0.254159	-0.945808	–	0.437489	0.729
12	delta	ncc	superior frontal R	ASD-Possible vs ASD-Probable	-0.346391	-1.00213	–	0.309349	0.584
12	delta	ncc	superior parietal L	ASD-Unlikely vs ASD-Possible	0.126242	-0.495629	–	0.748114	0.859
12	delta	ncc	superior parietal L	ASD-Unlikely vs ASD-Probable	-0.585329	-1.25199	–	0.0813266	0.304
12	delta	ncc	superior parietal L	ASD-Possible vs ASD-Probable	-0.711572	-1.39381	–	-0.0293323	0.251
12	delta	ncc	superior parietal R	ASD-Unlikely vs ASD-Possible	-0.612315	-1.15715	–	-0.0674808	0.249
12	delta	ncc	superior parietal R	ASD-Unlikely vs ASD-Probable	-0.917802	-1.545	–	-0.290608	0.084
12	delta	ncc	superior parietal R	ASD-Possible vs ASD-Probable	-0.305487	-0.941089	–	0.330114	0.619
12	delta	ncc	superior temporal L	ASD-Unlikely vs ASD-Possible	0.115797	-0.406365	–	0.637958	0.837
12	delta	ncc	superior temporal L	ASD-Unlikely vs ASD-Probable	-0.526026	-1.15808	–	0.106032	0.333
12	delta	ncc	superior temporal L	ASD-Possible vs ASD-Probable	-0.641823	-1.23168	–	-0.0519696	0.251
12	delta	ncc	superior temporal R	ASD-Unlikely vs ASD-Possible	0.124269	-0.325954	–	0.574493	0.811
12	delta	ncc	superior temporal R	ASD-Unlikely vs ASD-Probable	-0.460372	-0.993877	–	0.073134	0.304
12	delta	ncc	superior temporal R	ASD-Possible vs ASD-Probable	-0.584641	-1.10759	–	-0.0616897	0.249
12	delta	ncc	supramarginal L	ASD-Unlikely vs ASD-Possible	-0.537637	-1.34067	–	0.265399	0.46
12	delta	ncc	supramarginal L	ASD-Unlikely vs ASD-Probable	-0.219947	-1.08171	–	0.641819	0.824
12	delta	ncc	supramarginal L	ASD-Possible vs ASD-Probable	0.31769	-0.555075	–	1.19045	0.729
12	delta	ncc	supramarginal R	ASD-Unlikely vs ASD-Possible	0.0270575	-0.672163	–	0.726278	0.973
12	delta	ncc	supramarginal R	ASD-Unlikely vs ASD-Probable	-1.04869	-1.76248	–	-0.334898	0.084
12	delta	ncc	supramarginal R	ASD-Possible vs ASD-Probable	-1.07574	-1.80984	–	-0.341648	0.084
12	delta	ncc	temporal pole L	ASD-Unlikely vs ASD-Possible	0.02404	-0.384752	–	0.432832	0.955
12	delta	ncc	temporal pole L	ASD-Unlikely vs ASD-Probable	-0.260065	-0.733504	–	0.213373	0.57
12	delta	ncc	temporal pole L	ASD-Possible vs ASD-Probable	-0.284105	-0.748729	–	0.180519	0.523
12	delta	ncc	temporal pole R	ASD-Unlikely vs ASD-Possible	0.158085	-0.201226	–	0.517396	0.661
12	delta	ncc	temporal pole R	ASD-Unlikely vs ASD-Probable	-0.119865	-0.536829	–	0.297099	0.808
12	delta	ncc	temporal pole R	ASD-Possible vs ASD-Probable	-0.27795	-0.689418	–	0.133518	0.459
12	delta	ncc	transverse temporal L	ASD-Unlikely vs ASD-Possible	0.136669	-0.309173	–	0.582511	0.794
12	delta	ncc	transverse temporal L	ASD-Unlikely vs ASD-Probable	0.0573767	-0.472028	–	0.586782	0.907
12	delta	ncc	transverse temporal L	ASD-Possible vs ASD-Probable	-0.0792925	-0.605026	–	0.446441	0.893
12	delta	ncc	transverse temporal R	ASD-Unlikely vs ASD-Possible	-0.0751052	-0.596892	–	0.446681	0.893
12	delta	ncc	transverse temporal R	ASD-Unlikely vs ASD-Probable	-0.264989	-0.880932	–	0.350954	0.67
12	delta	ncc	transverse temporal R	ASD-Possible vs ASD-Probable	-0.189884	-0.810853	–	0.431085	0.794
12	delta	npl	bankssts L	ASD-Unlikely vs ASD-Possible	-0.164542	-0.290207	–	-0.0388776	0.23
12	delta	npl	bankssts L	ASD-Unlikely vs ASD-Probable	-0.204737	-0.36267	–	-0.0468051	0.23
12	delta	npl	bankssts L	ASD-Possible vs ASD-Probable	-0.0401951	-0.202179	–	0.121789	0.86
12	delta	npl	bankssts R	ASD-Unlikely vs ASD-Possible	-0.0947725	-0.233785	–	0.0442404	0.512
12	delta	npl	bankssts R	ASD-Unlikely vs ASD-Probable	-0.136319	-0.308496	–	0.0358577	0.494
12	delta	npl	bankssts R	ASD-Possible vs ASD-Probable	-0.0415468	-0.220331	–	0.137237	0.86
12	delta	npl	caudal anterior cingulate L	ASD-Unlikely vs ASD-Possible	-0.120566	-0.251853	–	0.0107206	0.405
12	delta	npl	caudal anterior cingulate L	ASD-Unlikely vs ASD-Probable	-0.154833	-0.321277	–	0.0116109	0.405
12	delta	npl	caudal anterior cingulate L	ASD-Possible vs ASD-Probable	-0.0342672	-0.204737	–	0.136203	0.86
12	delta	npl	caudal anterior cingulate R	ASD-Unlikely vs ASD-Possible	-0.119197	-0.302843	–	0.0644491	0.546
12	delta	npl	caudal anterior cingulate R	ASD-Unlikely vs ASD-Probable	-0.143342	-0.37466	–	0.0879768	0.573
12	delta	npl	caudal anterior cingulate R	ASD-Possible vs ASD-Probable	-0.0241446	-0.263375	–	0.215086	0.915
12	delta	npl	caudal middle frontal L	ASD-Unlikely vs ASD-Possible	-0.0680374	-0.210973	–	0.0748979	0.693
12	delta	npl	caudal middle frontal L	ASD-Unlikely vs ASD-Probable	-0.121233	-0.299826	–	0.0573608	0.512
12	delta	npl	caudal middle frontal L	ASD-Possible vs ASD-Probable	-0.0531955	-0.236829	–	0.130438	0.849
12	delta	npl	caudal middle frontal R	ASD-Unlikely vs ASD-Possible	-0.176519	-0.366101	–	0.0130628	0.405
12	delta	npl	caudal middle frontal R	ASD-Unlikely vs ASD-Probable	-0.172699	-0.403736	–	0.0583375	0.494
12	delta	npl	caudal middle frontal R	ASD-Possible vs ASD-Probable	0.0038199	-0.238424	–	0.246064	0.98
12	delta	npl	cuneus L	ASD-Unlikely vs ASD-Possible	-0.141229	-0.28855	–	0.00609129	0.405
12	delta	npl	cuneus L	ASD-Unlikely vs ASD-Probable	-0.167107	-0.34974	–	0.0155271	0.405
12	delta	npl	cuneus L	ASD-Possible vs ASD-Probable	-0.0258773	-0.21402	–	0.162265	0.897
12	delta	npl	cuneus R	ASD-Unlikely vs ASD-Possible	-0.164099	-0.273916	–	-0.0542825	0.188
12	delta	npl	cuneus R	ASD-Unlikely vs ASD-Probable	-0.268824	-0.405973	–	-0.131676	0.025*
12	delta	npl	cuneus R	ASD-Possible vs ASD-Probable	-0.104725	-0.244521	–	0.0350706	0.494
12	delta	npl	entorhinal L	ASD-Unlikely vs ASD-Possible	0.00710954	-0.0813942	–	0.0956133	0.934
12	delta	npl	entorhinal L	ASD-Unlikely vs ASD-Probable	-0.0367142	-0.147656	–	0.0742276	0.822
12	delta	npl	entorhinal L	ASD-Possible vs ASD-Probable	-0.0438238	-0.157956	–	0.0703087	0.749
12	delta	npl	entorhinal R	ASD-Unlikely vs ASD-Possible	0.0118624	-0.0959738	–	0.119699	0.91
12	delta	npl	entorhinal R	ASD-Unlikely vs ASD-Probable	0.0370777	-0.0966387	–	0.170794	0.855
12	delta	npl	entorhinal R	ASD-Possible vs ASD-Probable	0.0252153	-0.113094	–	0.163525	0.87
12	delta	npl	frontal pole L	ASD-Unlikely vs ASD-Possible	-0.0525002	-0.162888	–	0.0578882	0.693
12	delta	npl	frontal pole L	ASD-Unlikely vs ASD-Probable	-0.0965107	-0.233499	–	0.0404774	0.504
12	delta	npl	frontal pole L	ASD-Possible vs ASD-Probable	-0.0440105	-0.18649	–	0.0984689	0.831
12	delta	npl	frontal pole R	ASD-Unlikely vs ASD-Possible	-0.0449028	-0.163699	–	0.0738933	0.755
12	delta	npl	frontal pole R	ASD-Unlikely vs ASD-Probable	0.034995	-0.112861	–	0.182851	0.86
12	delta	npl	frontal pole R	ASD-Possible vs ASD-Probable	0.0798978	-0.0748809	–	0.234676	0.675
12	delta	npl	fusiform L	ASD-Unlikely vs ASD-Possible	-0.135584	-0.248243	–	-0.0229253	0.267
12	delta	npl	fusiform L	ASD-Unlikely vs ASD-Probable	-0.0787245	-0.219394	–	0.0619448	0.65
12	delta	npl	fusiform L	ASD-Possible vs ASD-Probable	0.0568599	-0.0878547	–	0.201575	0.749
12	delta	npl	fusiform R	ASD-Unlikely vs ASD-Possible	-0.0827735	-0.193397	–	0.02785	0.494
12	delta	npl	fusiform R	ASD-Unlikely vs ASD-Probable	-0.107858	-0.246631	–	0.0309145	0.494
12	delta	npl	fusiform R	ASD-Possible vs ASD-Probable	-0.0250847	-0.167342	–	0.117172	0.876
12	delta	npl	inferior parietal L	ASD-Unlikely vs ASD-Possible	-0.102135	-0.274266	–	0.0699957	0.609
12	delta	npl	inferior parietal L	ASD-Unlikely vs ASD-Probable	-0.121302	-0.335939	–	0.0933364	0.65
12	delta	npl	inferior parietal L	ASD-Possible vs ASD-Probable	-0.0191665	-0.241898	–	0.203565	0.93
12	delta	npl	inferior parietal R	ASD-Unlikely vs ASD-Possible	-0.153843	-0.313661	–	0.00597528	0.405
12	delta	npl	inferior parietal R	ASD-Unlikely vs ASD-Probable	-0.209664	-0.410651	–	-0.00867756	0.348
12	delta	npl	inferior parietal R	ASD-Possible vs ASD-Probable	-0.0558214	-0.262129	–	0.150486	0.856
12	delta	npl	inferior temporal L	ASD-Unlikely vs ASD-Possible	-0.0859155	-0.223513	–	0.0516818	0.573
12	delta	npl	inferior temporal L	ASD-Unlikely vs ASD-Probable	-0.0669506	-0.239732	–	0.10583	0.749
12	delta	npl	inferior temporal L	ASD-Possible vs ASD-Probable	0.0189649	-0.158286	–	0.196216	0.91
12	delta	npl	inferior temporal R	ASD-Unlikely vs ASD-Possible	-0.0682113	-0.165426	–	0.0290038	0.504
12	delta	npl	inferior temporal R	ASD-Unlikely vs ASD-Probable	-0.00811842	-0.129805	–	0.113568	0.937
12	delta	npl	inferior temporal R	ASD-Possible vs ASD-Probable	0.0600929	-0.0647121	–	0.184898	0.693
12	delta	npl	insula L	ASD-Unlikely vs ASD-Possible	-0.0557363	-0.135147	–	0.0236746	0.504
12	delta	npl	insula L	ASD-Unlikely vs ASD-Probable	-0.0342781	-0.133868	–	0.0653115	0.804
12	delta	npl	insula L	ASD-Possible vs ASD-Probable	0.0214582	-0.0801514	–	0.123068	0.86
12	delta	npl	insula R	ASD-Unlikely vs ASD-Possible	-0.0473412	-0.115293	–	0.020611	0.504
12	delta	npl	insula R	ASD-Unlikely vs ASD-Probable	-0.0587783	-0.143336	–	0.0257793	0.504
12	delta	npl	insula R	ASD-Possible vs ASD-Probable	-0.0114371	-0.0984022	–	0.075528	0.897
12	delta	npl	isthmus cingulate L	ASD-Unlikely vs ASD-Possible	-0.0613477	-0.140363	–	0.0176676	0.494
12	delta	npl	isthmus cingulate L	ASD-Unlikely vs ASD-Probable	-0.0825575	-0.181445	–	0.0163297	0.477
12	delta	npl	isthmus cingulate L	ASD-Possible vs ASD-Probable	-0.0212098	-0.122885	–	0.0804655	0.86
12	delta	npl	isthmus cingulate R	ASD-Unlikely vs ASD-Possible	-0.0215566	-0.126147	–	0.0830336	0.86
12	delta	npl	isthmus cingulate R	ASD-Unlikely vs ASD-Probable	-0.0912165	-0.222409	–	0.0399757	0.504
12	delta	npl	isthmus cingulate R	ASD-Possible vs ASD-Probable	-0.0696599	-0.204488	–	0.0651684	0.675
12	delta	npl	lateral occipital L	ASD-Unlikely vs ASD-Possible	-0.164193	-0.275025	–	-0.053361	0.188
12	delta	npl	lateral occipital L	ASD-Unlikely vs ASD-Probable	-0.19608	-0.335025	–	-0.057136	0.22
12	delta	npl	lateral occipital L	ASD-Possible vs ASD-Probable	-0.0318872	-0.1741	–	0.110325	0.86
12	delta	npl	lateral occipital R	ASD-Unlikely vs ASD-Possible	-0.0651064	-0.197029	–	0.0668165	0.687
12	delta	npl	lateral occipital R	ASD-Unlikely vs ASD-Probable	-0.0434528	-0.211764	–	0.124859	0.86
12	delta	npl	lateral occipital R	ASD-Possible vs ASD-Probable	0.0216536	-0.148342	–	0.191649	0.897
12	delta	npl	lateral orbitofrontal L	ASD-Unlikely vs ASD-Possible	-0.0135461	-0.106433	–	0.0793405	0.897
12	delta	npl	lateral orbitofrontal L	ASD-Unlikely vs ASD-Probable	-0.113619	-0.229789	–	0.002551	0.404
12	delta	npl	lateral orbitofrontal L	ASD-Possible vs ASD-Probable	-0.100073	-0.219083	–	0.018937	0.477
12	delta	npl	lateral orbitofrontal R	ASD-Unlikely vs ASD-Possible	-0.0553411	-0.126882	–	0.0161998	0.494
12	delta	npl	lateral orbitofrontal R	ASD-Unlikely vs ASD-Probable	-0.0128657	-0.102748	–	0.0770163	0.897
12	delta	npl	lateral orbitofrontal R	ASD-Possible vs ASD-Probable	0.0424755	-0.0497897	–	0.134741	0.709
12	delta	npl	lingual L	ASD-Unlikely vs ASD-Possible	-0.0408461	-0.138626	–	0.0569334	0.74
12	delta	npl	lingual L	ASD-Unlikely vs ASD-Probable	-0.0927657	-0.213537	–	0.0280053	0.494
12	delta	npl	lingual L	ASD-Possible vs ASD-Probable	-0.0519196	-0.176393	–	0.0725537	0.74
12	delta	npl	lingual R	ASD-Unlikely vs ASD-Possible	0.0145208	-0.0899955	–	0.119037	0.897
12	delta	npl	lingual R	ASD-Unlikely vs ASD-Probable	-0.0489672	-0.180744	–	0.0828098	0.761
12	delta	npl	lingual R	ASD-Possible vs ASD-Probable	-0.063488	-0.197607	–	0.0706305	0.693
12	delta	npl	medial orbitofrontal L	ASD-Unlikely vs ASD-Possible	-0.0899888	-0.171042	–	-0.0089356	0.322
12	delta	npl	medial orbitofrontal L	ASD-Unlikely vs ASD-Probable	-0.112383	-0.213729	–	-0.0110376	0.322
12	delta	npl	medial orbitofrontal L	ASD-Possible vs ASD-Probable	-0.0223947	-0.126226	–	0.0814367	0.86
12	delta	npl	medial orbitofrontal R	ASD-Unlikely vs ASD-Possible	-0.106028	-0.190167	–	-0.0218882	0.23
12	delta	npl	medial orbitofrontal R	ASD-Unlikely vs ASD-Probable	-0.019754	-0.124747	–	0.0852388	0.865
12	delta	npl	medial orbitofrontal R	ASD-Possible vs ASD-Probable	0.0862737	-0.0218488	–	0.194396	0.494
12	delta	npl	middle temporal L	ASD-Unlikely vs ASD-Possible	-0.0968859	-0.202776	–	0.00900459	0.405
12	delta	npl	middle temporal L	ASD-Unlikely vs ASD-Probable	-0.0874364	-0.220133	–	0.04526	0.535
12	delta	npl	middle temporal L	ASD-Possible vs ASD-Probable	0.00944946	-0.127165	–	0.146064	0.937
12	delta	npl	middle temporal R	ASD-Unlikely vs ASD-Possible	-0.0654175	-0.168474	–	0.0376395	0.566
12	delta	npl	middle temporal R	ASD-Unlikely vs ASD-Probable	-0.0499957	-0.180086	–	0.0800945	0.749
12	delta	npl	middle temporal R	ASD-Possible vs ASD-Probable	0.0154218	-0.117006	–	0.14785	0.907
12	delta	npl	paracentral L	ASD-Unlikely vs ASD-Possible	-0.128831	-0.260645	–	0.00298365	0.404
12	delta	npl	paracentral L	ASD-Unlikely vs ASD-Probable	-0.124864	-0.289968	–	0.0402404	0.494
12	delta	npl	paracentral L	ASD-Possible vs ASD-Probable	0.0039668	-0.164462	–	0.172396	0.98
12	delta	npl	paracentral R	ASD-Unlikely vs ASD-Possible	-0.155516	-0.278588	–	-0.0324453	0.23
12	delta	npl	paracentral R	ASD-Unlikely vs ASD-Probable	-0.0666889	-0.219961	–	0.0865836	0.73
12	delta	npl	paracentral R	ASD-Possible vs ASD-Probable	0.0888276	-0.0703272	–	0.247982	0.65
12	delta	npl	parahippocampal L	ASD-Unlikely vs ASD-Possible	-0.0251694	-0.135996	–	0.085657	0.86
12	delta	npl	parahippocampal L	ASD-Unlikely vs ASD-Probable	-0.188437	-0.326648	–	-0.0502248	0.22
12	delta	npl	parahippocampal L	ASD-Possible vs ASD-Probable	-0.163267	-0.305139	–	-0.0213957	0.322
12	delta	npl	parahippocampal R	ASD-Unlikely vs ASD-Possible	0.012861	-0.0890452	–	0.114767	0.897
12	delta	npl	parahippocampal R	ASD-Unlikely vs ASD-Probable	-0.0379524	-0.164856	–	0.0889509	0.837
12	delta	npl	parahippocampal R	ASD-Possible vs ASD-Probable	-0.0508133	-0.181379	–	0.0797522	0.749
12	delta	npl	pars opercularis L	ASD-Unlikely vs ASD-Possible	-0.0649859	-0.175526	–	0.0455545	0.613
12	delta	npl	pars opercularis L	ASD-Unlikely vs ASD-Probable	-0.135625	-0.273497	–	0.00224801	0.404
12	delta	npl	pars opercularis L	ASD-Possible vs ASD-Probable	-0.0706387	-0.211924	–	0.0706463	0.687
12	delta	npl	pars opercularis R	ASD-Unlikely vs ASD-Possible	-0.0741868	-0.172688	–	0.0243142	0.494
12	delta	npl	pars opercularis R	ASD-Unlikely vs ASD-Probable	-0.10963	-0.232265	–	0.0130055	0.428
12	delta	npl	pars opercularis R	ASD-Possible vs ASD-Probable	-0.0354431	-0.162325	–	0.0914384	0.855
12	delta	npl	pars orbitalis L	ASD-Unlikely vs ASD-Possible	-0.0513722	-0.151408	–	0.0486638	0.675
12	delta	npl	pars orbitalis L	ASD-Unlikely vs ASD-Probable	-0.0910844	-0.216258	–	0.0340893	0.504
12	delta	npl	pars orbitalis L	ASD-Possible vs ASD-Probable	-0.0397122	-0.168502	–	0.0890778	0.831
12	delta	npl	pars orbitalis R	ASD-Unlikely vs ASD-Possible	-0.0198657	-0.11468	–	0.0749485	0.86
12	delta	npl	pars orbitalis R	ASD-Unlikely vs ASD-Probable	-0.0489175	-0.167948	–	0.070113	0.746
12	delta	npl	pars orbitalis R	ASD-Possible vs ASD-Probable	-0.0290518	-0.151318	–	0.0932141	0.86
12	delta	npl	pars triangularis L	ASD-Unlikely vs ASD-Possible	-0.0383094	-0.124951	–	0.048332	0.723
12	delta	npl	pars triangularis L	ASD-Unlikely vs ASD-Probable	-0.0151171	-0.12381	–	0.0935759	0.897
12	delta	npl	pars triangularis L	ASD-Possible vs ASD-Probable	0.0231923	-0.0878886	–	0.134273	0.86
12	delta	npl	pars triangularis R	ASD-Unlikely vs ASD-Possible	-0.0765229	-0.191206	–	0.0381604	0.526
12	delta	npl	pars triangularis R	ASD-Unlikely vs ASD-Probable	-0.0464452	-0.189378	–	0.096488	0.822
12	delta	npl	pars triangularis R	ASD-Possible vs ASD-Probable	0.0300777	-0.117687	–	0.177843	0.86
12	delta	npl	pericalcarine L	ASD-Unlikely vs ASD-Possible	-0.0831185	-0.181538	–	0.0153012	0.477
12	delta	npl	pericalcarine L	ASD-Unlikely vs ASD-Probable	-0.135881	-0.258835	–	-0.0129277	0.322
12	delta	npl	pericalcarine L	ASD-Possible vs ASD-Probable	-0.0527626	-0.179115	–	0.0735901	0.74
12	delta	npl	pericalcarine R	ASD-Unlikely vs ASD-Possible	-0.0569805	-0.161042	–	0.0470809	0.651
12	delta	npl	pericalcarine R	ASD-Unlikely vs ASD-Probable	-0.218291	-0.350325	–	-0.0862558	0.122
12	delta	npl	pericalcarine R	ASD-Possible vs ASD-Probable	-0.16131	-0.294934	–	-0.0276859	0.267
12	delta	npl	postcentral L	ASD-Unlikely vs ASD-Possible	0.00045359	-0.168898	–	0.169805	0.996
12	delta	npl	postcentral L	ASD-Unlikely vs ASD-Probable	-0.0647598	-0.271076	–	0.141556	0.831
12	delta	npl	postcentral L	ASD-Possible vs ASD-Probable	-0.0652134	-0.280941	–	0.150514	0.836
12	delta	npl	postcentral R	ASD-Unlikely vs ASD-Possible	-0.193326	-0.366571	–	-0.0200804	0.322
12	delta	npl	postcentral R	ASD-Unlikely vs ASD-Probable	-0.223379	-0.436587	–	-0.0101701	0.348
12	delta	npl	postcentral R	ASD-Possible vs ASD-Probable	-0.030053	-0.252074	–	0.191968	0.897
12	delta	npl	posterior cingulate L	ASD-Unlikely vs ASD-Possible	-0.0196798	-0.118984	–	0.0796248	0.86
12	delta	npl	posterior cingulate L	ASD-Unlikely vs ASD-Probable	0.00531287	-0.119619	–	0.130245	0.967
12	delta	npl	posterior cingulate L	ASD-Possible vs ASD-Probable	0.0249927	-0.103788	–	0.153773	0.86
12	delta	npl	posterior cingulate R	ASD-Unlikely vs ASD-Possible	-0.124537	-0.241718	–	-0.00735629	0.348
12	delta	npl	posterior cingulate R	ASD-Unlikely vs ASD-Probable	-0.133554	-0.279836	–	0.0127267	0.405
12	delta	npl	posterior cingulate R	ASD-Possible vs ASD-Probable	-0.00901713	-0.161163	–	0.143129	0.945
12	delta	npl	precentral L	ASD-Unlikely vs ASD-Possible	0.00189979	-0.0911599	–	0.0949595	0.98
12	delta	npl	precentral L	ASD-Unlikely vs ASD-Probable	-0.0227695	-0.13968	–	0.0941414	0.86
12	delta	npl	precentral L	ASD-Possible vs ASD-Probable	-0.0246693	-0.145023	–	0.0956844	0.86
12	delta	npl	precentral R	ASD-Unlikely vs ASD-Possible	-0.144537	-0.285252	–	-0.00382216	0.36
12	delta	npl	precentral R	ASD-Unlikely vs ASD-Probable	-0.121224	-0.294034	–	0.0515858	0.504
12	delta	npl	precentral R	ASD-Possible vs ASD-Probable	0.0233131	-0.157233	–	0.203859	0.897
12	delta	npl	precuneus L	ASD-Unlikely vs ASD-Possible	-0.0731838	-0.191563	–	0.0451951	0.573
12	delta	npl	precuneus L	ASD-Unlikely vs ASD-Probable	-0.106079	-0.254605	–	0.0424465	0.504
12	delta	npl	precuneus L	ASD-Possible vs ASD-Probable	-0.0328956	-0.183754	–	0.117963	0.86
12	delta	npl	precuneus R	ASD-Unlikely vs ASD-Possible	-0.0844967	-0.196311	–	0.0273172	0.494
12	delta	npl	precuneus R	ASD-Unlikely vs ASD-Probable	-0.123603	-0.263866	–	0.016659	0.44
12	delta	npl	precuneus R	ASD-Possible vs ASD-Probable	-0.0391067	-0.182402	–	0.104189	0.856
12	delta	npl	rostral anterior cingulate L	ASD-Unlikely vs ASD-Possible	-0.0539187	-0.164601	–	0.0567637	0.693
12	delta	npl	rostral anterior cingulate L	ASD-Unlikely vs ASD-Probable	0.00987311	-0.131164	–	0.15091	0.937
12	delta	npl	rostral anterior cingulate L	ASD-Possible vs ASD-Probable	0.0637918	-0.080055	–	0.207639	0.723
12	delta	npl	rostral anterior cingulate R	ASD-Unlikely vs ASD-Possible	-0.140358	-0.241893	–	-0.0388233	0.22
12	delta	npl	rostral anterior cingulate R	ASD-Unlikely vs ASD-Probable	-0.0148467	-0.144672	–	0.114979	0.907
12	delta	npl	rostral anterior cingulate R	ASD-Possible vs ASD-Probable	0.125512	-0.00692462	–	0.257948	0.405
12	delta	npl	rostral middle frontal L	ASD-Unlikely vs ASD-Possible	-0.0233364	-0.120276	–	0.0736035	0.86
12	delta	npl	rostral middle frontal L	ASD-Unlikely vs ASD-Probable	0.0402376	-0.0822367	–	0.162712	0.822
12	delta	npl	rostral middle frontal L	ASD-Possible vs ASD-Probable	0.063574	-0.0624135	–	0.189561	0.686
12	delta	npl	rostral middle frontal R	ASD-Unlikely vs ASD-Possible	-0.0101191	-0.143825	–	0.123587	0.937
12	delta	npl	rostral middle frontal R	ASD-Unlikely vs ASD-Probable	-0.00365587	-0.172327	–	0.165016	0.98
12	delta	npl	rostral middle frontal R	ASD-Possible vs ASD-Probable	0.0064632	-0.166515	–	0.179442	0.97
12	delta	npl	superior frontal L	ASD-Unlikely vs ASD-Possible	-0.0406727	-0.146536	–	0.0651911	0.749
12	delta	npl	superior frontal L	ASD-Unlikely vs ASD-Probable	-0.068996	-0.201083	–	0.0630912	0.675
12	delta	npl	superior frontal L	ASD-Possible vs ASD-Probable	-0.0283233	-0.164413	–	0.107767	0.86
12	delta	npl	superior frontal R	ASD-Unlikely vs ASD-Possible	-0.152499	-0.296859	–	-0.00813894	0.348
12	delta	npl	superior frontal R	ASD-Unlikely vs ASD-Probable	-0.149123	-0.329553	–	0.0313068	0.477
12	delta	npl	superior frontal R	ASD-Possible vs ASD-Probable	0.00337604	-0.184147	–	0.190899	0.98
12	delta	npl	superior parietal L	ASD-Unlikely vs ASD-Possible	-0.0718573	-0.216469	–	0.0727547	0.687
12	delta	npl	superior parietal L	ASD-Unlikely vs ASD-Probable	-0.0984974	-0.276569	–	0.0795746	0.651
12	delta	npl	superior parietal L	ASD-Possible vs ASD-Probable	-0.02664	-0.211594	–	0.158313	0.897
12	delta	npl	superior parietal R	ASD-Unlikely vs ASD-Possible	-0.0819956	-0.215157	–	0.0511663	0.573
12	delta	npl	superior parietal R	ASD-Unlikely vs ASD-Probable	-0.116961	-0.282462	–	0.0485397	0.504
12	delta	npl	superior parietal R	ASD-Possible vs ASD-Probable	-0.0349658	-0.204859	–	0.134927	0.86
12	delta	npl	superior temporal L	ASD-Unlikely vs ASD-Possible	-0.0814637	-0.190178	–	0.0272507	0.494
12	delta	npl	superior temporal L	ASD-Unlikely vs ASD-Probable	-0.0582659	-0.196447	–	0.079915	0.74
12	delta	npl	superior temporal L	ASD-Possible vs ASD-Probable	0.0231978	-0.118103	–	0.164499	0.887
12	delta	npl	superior temporal R	ASD-Unlikely vs ASD-Possible	-0.0451224	-0.130422	–	0.0401775	0.675
12	delta	npl	superior temporal R	ASD-Unlikely vs ASD-Probable	-0.135747	-0.242036	–	-0.0294587	0.23
12	delta	npl	superior temporal R	ASD-Possible vs ASD-Probable	-0.090625	-0.200031	–	0.0187813	0.477
12	delta	npl	supramarginal L	ASD-Unlikely vs ASD-Possible	-0.128498	-0.31141	–	0.0544142	0.504
12	delta	npl	supramarginal L	ASD-Unlikely vs ASD-Probable	-0.249847	-0.477668	–	-0.0220269	0.322
12	delta	npl	supramarginal L	ASD-Possible vs ASD-Probable	-0.121349	-0.356739	–	0.11404	0.675
12	delta	npl	supramarginal R	ASD-Unlikely vs ASD-Possible	-0.0680163	-0.216271	–	0.0802384	0.709
12	delta	npl	supramarginal R	ASD-Unlikely vs ASD-Probable	-0.141458	-0.324831	–	0.041916	0.494
12	delta	npl	supramarginal R	ASD-Possible vs ASD-Probable	-0.0734413	-0.263113	–	0.11623	0.749
12	delta	npl	temporal pole L	ASD-Unlikely vs ASD-Possible	-0.0337598	-0.152187	–	0.0846672	0.852
12	delta	npl	temporal pole L	ASD-Unlikely vs ASD-Probable	-0.0601848	-0.209331	–	0.0889613	0.749
12	delta	npl	temporal pole L	ASD-Possible vs ASD-Probable	-0.026425	-0.180507	–	0.127657	0.879
12	delta	npl	temporal pole R	ASD-Unlikely vs ASD-Possible	-0.0690066	-0.150105	–	0.0120919	0.477
12	delta	npl	temporal pole R	ASD-Unlikely vs ASD-Probable	-0.0328641	-0.134938	–	0.0692102	0.822
12	delta	npl	temporal pole R	ASD-Possible vs ASD-Probable	0.0361425	-0.0689876	–	0.141273	0.804
12	delta	npl	transverse temporal L	ASD-Unlikely vs ASD-Possible	-0.0962861	-0.237925	–	0.0453525	0.512
12	delta	npl	transverse temporal L	ASD-Unlikely vs ASD-Probable	-0.0787781	-0.256827	–	0.0992708	0.723
12	delta	npl	transverse temporal L	ASD-Possible vs ASD-Probable	0.017508	-0.165616	–	0.200632	0.919
12	delta	npl	transverse temporal R	ASD-Unlikely vs ASD-Possible	0.0571009	-0.0473347	–	0.161537	0.651
12	delta	npl	transverse temporal R	ASD-Unlikely vs ASD-Probable	0.0296438	-0.101876	–	0.161163	0.86
12	delta	npl	transverse temporal R	ASD-Possible vs ASD-Probable	-0.0274571	-0.162544	–	0.107629	0.86
12	theta	ncc	bankssts L	ASD-Unlikely vs ASD-Possible	0.0075229	-0.698222	–	0.713268	0.985
12	theta	ncc	bankssts L	ASD-Unlikely vs ASD-Probable	-0.303254	-1.07424	–	0.467731	0.756
12	theta	ncc	bankssts L	ASD-Possible vs ASD-Probable	-0.310777	-1.08656	–	0.465004	0.754
12	theta	ncc	bankssts R	ASD-Unlikely vs ASD-Possible	-0.218888	-0.819039	–	0.381263	0.758
12	theta	ncc	bankssts R	ASD-Unlikely vs ASD-Probable	-0.430963	-1.15945	–	0.297521	0.598
12	theta	ncc	bankssts R	ASD-Possible vs ASD-Probable	-0.212076	-0.896732	–	0.472581	0.801
12	theta	ncc	caudal anterior cingulate L	ASD-Unlikely vs ASD-Possible	-0.0938715	-0.588548	–	0.400805	0.893
12	theta	ncc	caudal anterior cingulate L	ASD-Unlikely vs ASD-Probable	-0.924881	-1.54326	–	-0.306498	0.058
12	theta	ncc	caudal anterior cingulate L	ASD-Possible vs ASD-Probable	-0.831009	-1.42392	–	-0.238096	0.074
12	theta	ncc	caudal anterior cingulate R	ASD-Unlikely vs ASD-Possible	-0.344985	-0.767793	–	0.077823	0.4
12	theta	ncc	caudal anterior cingulate R	ASD-Unlikely vs ASD-Probable	-0.805297	-1.30805	–	-0.302543	0.043*
12	theta	ncc	caudal anterior cingulate R	ASD-Possible vs ASD-Probable	-0.460312	-0.943675	–	0.0230505	0.296
12	theta	ncc	caudal middle frontal L	ASD-Unlikely vs ASD-Possible	-0.139524	-0.77827	–	0.499221	0.874
12	theta	ncc	caudal middle frontal L	ASD-Unlikely vs ASD-Probable	-0.375542	-1.09324	–	0.342161	0.655
12	theta	ncc	caudal middle frontal L	ASD-Possible vs ASD-Probable	-0.236018	-0.931225	–	0.45919	0.776
12	theta	ncc	caudal middle frontal R	ASD-Unlikely vs ASD-Possible	-0.263151	-0.902236	–	0.375934	0.744
12	theta	ncc	caudal middle frontal R	ASD-Unlikely vs ASD-Probable	0.213311	-0.555889	–	0.982512	0.826
12	theta	ncc	caudal middle frontal R	ASD-Possible vs ASD-Probable	0.476462	-0.276087	–	1.22901	0.587
12	theta	ncc	cuneus L	ASD-Unlikely vs ASD-Possible	-0.17743	-0.539437	–	0.184577	0.673
12	theta	ncc	cuneus L	ASD-Unlikely vs ASD-Probable	-0.807568	-1.22259	–	-0.392544	0.014*
12	theta	ncc	cuneus L	ASD-Possible vs ASD-Probable	-0.630138	-1.04939	–	-0.210885	0.058
12	theta	ncc	cuneus R	ASD-Unlikely vs ASD-Possible	-0.213853	-0.60622	–	0.178514	0.64
12	theta	ncc	cuneus R	ASD-Unlikely vs ASD-Probable	-0.36621	-0.82226	–	0.0898398	0.406
12	theta	ncc	cuneus R	ASD-Possible vs ASD-Probable	-0.152357	-0.612504	–	0.307789	0.786
12	theta	ncc	entorhinal L	ASD-Unlikely vs ASD-Possible	-0.0179317	-0.392688	–	0.356825	0.949
12	theta	ncc	entorhinal L	ASD-Unlikely vs ASD-Probable	-0.253526	-0.701567	–	0.194515	0.627
12	theta	ncc	entorhinal L	ASD-Possible vs ASD-Probable	-0.235595	-0.667364	–	0.196175	0.64
12	theta	ncc	entorhinal R	ASD-Unlikely vs ASD-Possible	-0.171167	-0.524917	–	0.182584	0.679
12	theta	ncc	entorhinal R	ASD-Unlikely vs ASD-Probable	-0.286694	-0.702106	–	0.128718	0.519
12	theta	ncc	entorhinal R	ASD-Possible vs ASD-Probable	-0.115527	-0.522847	–	0.291793	0.819
12	theta	ncc	frontal pole L	ASD-Unlikely vs ASD-Possible	0.0780309	-0.436042	–	0.592104	0.893
12	theta	ncc	frontal pole L	ASD-Unlikely vs ASD-Probable	-0.290154	-0.896709	–	0.316401	0.684
12	theta	ncc	frontal pole L	ASD-Possible vs ASD-Probable	-0.368185	-0.960939	–	0.224569	0.587
12	theta	ncc	frontal pole R	ASD-Unlikely vs ASD-Possible	-0.186922	-0.644186	–	0.270343	0.744
12	theta	ncc	frontal pole R	ASD-Unlikely vs ASD-Probable	-0.373093	-0.90221	–	0.156024	0.516
12	theta	ncc	frontal pole R	ASD-Possible vs ASD-Probable	-0.186171	-0.69798	–	0.325638	0.758
12	theta	ncc	fusiform L	ASD-Unlikely vs ASD-Possible	-0.30835	-0.709172	–	0.0924713	0.455
12	theta	ncc	fusiform L	ASD-Unlikely vs ASD-Probable	-0.267378	-0.731587	–	0.19683	0.614
12	theta	ncc	fusiform L	ASD-Possible vs ASD-Probable	0.040972	-0.418856	–	0.5008	0.906
12	theta	ncc	fusiform R	ASD-Unlikely vs ASD-Possible	-0.0336059	-0.444305	–	0.377093	0.913
12	theta	ncc	fusiform R	ASD-Unlikely vs ASD-Probable	-0.661117	-1.15533	–	-0.166905	0.099
12	theta	ncc	fusiform R	ASD-Possible vs ASD-Probable	-0.627512	-1.10556	–	-0.149464	0.103
12	theta	ncc	inferior parietal L	ASD-Unlikely vs ASD-Possible	-0.47703	-1.13408	–	0.180018	0.486
12	theta	ncc	inferior parietal L	ASD-Unlikely vs ASD-Probable	-0.526707	-1.24543	–	0.192018	0.486
12	theta	ncc	inferior parietal L	ASD-Possible vs ASD-Probable	-0.0496769	-0.804568	–	0.705215	0.925
12	theta	ncc	inferior parietal R	ASD-Unlikely vs ASD-Possible	-0.561301	-1.1258	–	0.00319342	0.292
12	theta	ncc	inferior parietal R	ASD-Unlikely vs ASD-Probable	-0.464275	-1.09061	–	0.162058	0.483
12	theta	ncc	inferior parietal R	ASD-Possible vs ASD-Probable	0.0970263	-0.514055	–	0.708107	0.893
12	theta	ncc	inferior temporal L	ASD-Unlikely vs ASD-Possible	0.0377961	-0.47779	–	0.553382	0.922
12	theta	ncc	inferior temporal L	ASD-Unlikely vs ASD-Probable	-0.208225	-0.812145	–	0.395695	0.776
12	theta	ncc	inferior temporal L	ASD-Possible vs ASD-Probable	-0.246021	-0.818858	–	0.326816	0.726
12	theta	ncc	inferior temporal R	ASD-Unlikely vs ASD-Possible	0.0686777	-0.385057	–	0.522412	0.893
12	theta	ncc	inferior temporal R	ASD-Unlikely vs ASD-Probable	-0.316468	-0.831561	–	0.198624	0.587
12	theta	ncc	inferior temporal R	ASD-Possible vs ASD-Probable	-0.385146	-0.890717	–	0.120424	0.46
12	theta	ncc	insula L	ASD-Unlikely vs ASD-Possible	-0.184515	-0.592483	–	0.223452	0.709
12	theta	ncc	insula L	ASD-Unlikely vs ASD-Probable	-0.462015	-0.938437	–	0.0144071	0.292
12	theta	ncc	insula L	ASD-Possible vs ASD-Probable	-0.277499	-0.745466	–	0.190467	0.598
12	theta	ncc	insula R	ASD-Unlikely vs ASD-Possible	0.296212	-0.103822	–	0.696247	0.483
12	theta	ncc	insula R	ASD-Unlikely vs ASD-Probable	-0.144906	-0.611108	–	0.321297	0.801
12	theta	ncc	insula R	ASD-Possible vs ASD-Probable	-0.441118	-0.896211	–	0.0139751	0.292
12	theta	ncc	isthmus cingulate L	ASD-Unlikely vs ASD-Possible	-0.133484	-0.510299	–	0.24333	0.771
12	theta	ncc	isthmus cingulate L	ASD-Unlikely vs ASD-Probable	-0.197315	-0.646354	–	0.251724	0.722
12	theta	ncc	isthmus cingulate L	ASD-Possible vs ASD-Probable	-0.0638309	-0.506989	–	0.379327	0.893
12	theta	ncc	isthmus cingulate R	ASD-Unlikely vs ASD-Possible	0.19926	-0.155653	–	0.554172	0.629
12	theta	ncc	isthmus cingulate R	ASD-Unlikely vs ASD-Probable	-0.00388094	-0.411695	–	0.403933	0.985
12	theta	ncc	isthmus cingulate R	ASD-Possible vs ASD-Probable	-0.203141	-0.601569	–	0.195287	0.661
12	theta	ncc	lateral occipital L	ASD-Unlikely vs ASD-Possible	-0.052196	-0.511692	–	0.4073	0.893
12	theta	ncc	lateral occipital L	ASD-Unlikely vs ASD-Probable	-0.314535	-0.811829	–	0.182759	0.587
12	theta	ncc	lateral occipital L	ASD-Possible vs ASD-Probable	-0.262339	-0.752548	–	0.22787	0.652
12	theta	ncc	lateral occipital R	ASD-Unlikely vs ASD-Possible	-0.456312	-0.938756	–	0.0261329	0.296
12	theta	ncc	lateral occipital R	ASD-Unlikely vs ASD-Probable	-0.0899324	-0.627048	–	0.447183	0.893
12	theta	ncc	lateral occipital R	ASD-Possible vs ASD-Probable	0.366379	-0.166081	–	0.898839	0.519
12	theta	ncc	lateral orbitofrontal L	ASD-Unlikely vs ASD-Possible	-0.0905248	-0.485359	–	0.30431	0.865
12	theta	ncc	lateral orbitofrontal L	ASD-Unlikely vs ASD-Probable	-0.284756	-0.739847	–	0.170336	0.587
12	theta	ncc	lateral orbitofrontal L	ASD-Possible vs ASD-Probable	-0.194231	-0.636647	–	0.248185	0.722
12	theta	ncc	lateral orbitofrontal R	ASD-Unlikely vs ASD-Possible	-0.0861473	-0.489577	–	0.317282	0.878
12	theta	ncc	lateral orbitofrontal R	ASD-Unlikely vs ASD-Probable	-0.284996	-0.74788	–	0.177887	0.587
12	theta	ncc	lateral orbitofrontal R	ASD-Possible vs ASD-Probable	-0.198849	-0.657128	–	0.25943	0.726
12	theta	ncc	lingual L	ASD-Unlikely vs ASD-Possible	0.13208	-0.213297	–	0.477457	0.758
12	theta	ncc	lingual L	ASD-Unlikely vs ASD-Probable	0.0535197	-0.348368	–	0.455408	0.893
12	theta	ncc	lingual L	ASD-Possible vs ASD-Probable	-0.0785604	-0.47909	–	0.321969	0.893
12	theta	ncc	lingual R	ASD-Unlikely vs ASD-Possible	-0.0833603	-0.422953	–	0.256232	0.852
12	theta	ncc	lingual R	ASD-Unlikely vs ASD-Probable	-0.038613	-0.433179	–	0.355953	0.901
12	theta	ncc	lingual R	ASD-Possible vs ASD-Probable	0.0447473	-0.347685	–	0.437179	0.893
12	theta	ncc	medial orbitofrontal L	ASD-Unlikely vs ASD-Possible	-0.117088	-0.508642	–	0.274466	0.807
12	theta	ncc	medial orbitofrontal L	ASD-Unlikely vs ASD-Probable	-0.250962	-0.701333	–	0.199409	0.63
12	theta	ncc	medial orbitofrontal L	ASD-Possible vs ASD-Probable	-0.133874	-0.572324	–	0.304575	0.801
12	theta	ncc	medial orbitofrontal R	ASD-Unlikely vs ASD-Possible	-0.0538781	-0.448365	–	0.340609	0.893
12	theta	ncc	medial orbitofrontal R	ASD-Unlikely vs ASD-Probable	-0.110936	-0.556904	–	0.335032	0.851
12	theta	ncc	medial orbitofrontal R	ASD-Possible vs ASD-Probable	-0.0570579	-0.504498	–	0.390382	0.893
12	theta	ncc	middle temporal L	ASD-Unlikely vs ASD-Possible	-0.15113	-0.59556	–	0.293299	0.776
12	theta	ncc	middle temporal L	ASD-Unlikely vs ASD-Probable	-0.137376	-0.648194	–	0.373443	0.835
12	theta	ncc	middle temporal L	ASD-Possible vs ASD-Probable	0.0137545	-0.485005	–	0.512514	0.976
12	theta	ncc	middle temporal R	ASD-Unlikely vs ASD-Possible	0.0518328	-0.420192	–	0.523858	0.893
12	theta	ncc	middle temporal R	ASD-Unlikely vs ASD-Probable	-0.27634	-0.828502	–	0.275821	0.673
12	theta	ncc	middle temporal R	ASD-Possible vs ASD-Probable	-0.328173	-0.870126	–	0.21378	0.587
12	theta	ncc	paracentral L	ASD-Unlikely vs ASD-Possible	-0.161786	-0.660456	–	0.336883	0.793
12	theta	ncc	paracentral L	ASD-Unlikely vs ASD-Probable	-0.623724	-1.21399	–	-0.0334586	0.261
12	theta	ncc	paracentral L	ASD-Possible vs ASD-Probable	-0.461937	-1.03217	–	0.108297	0.402
12	theta	ncc	paracentral R	ASD-Unlikely vs ASD-Possible	-0.457572	-0.970146	–	0.0550023	0.341
12	theta	ncc	paracentral R	ASD-Unlikely vs ASD-Probable	-0.552019	-1.15007	–	0.0460311	0.312
12	theta	ncc	paracentral R	ASD-Possible vs ASD-Probable	-0.0944476	-0.686676	–	0.49778	0.893
12	theta	ncc	parahippocampal L	ASD-Unlikely vs ASD-Possible	0.126615	-0.348357	–	0.601586	0.835
12	theta	ncc	parahippocampal L	ASD-Unlikely vs ASD-Probable	0.139576	-0.414086	–	0.693238	0.851
12	theta	ncc	parahippocampal L	ASD-Possible vs ASD-Probable	0.0129612	-0.528387	–	0.554309	0.977
12	theta	ncc	parahippocampal R	ASD-Unlikely vs ASD-Possible	-0.042214	-0.426834	–	0.342406	0.893
12	theta	ncc	parahippocampal R	ASD-Unlikely vs ASD-Probable	-0.451392	-0.887003	–	-0.0157804	0.278
12	theta	ncc	parahippocampal R	ASD-Possible vs ASD-Probable	-0.409178	-0.850636	–	0.0322808	0.312
12	theta	ncc	pars opercularis L	ASD-Unlikely vs ASD-Possible	-0.319078	-0.815305	–	0.17715	0.587
12	theta	ncc	pars opercularis L	ASD-Unlikely vs ASD-Probable	-0.907952	-1.50102	–	-0.314885	0.058
12	theta	ncc	pars opercularis L	ASD-Possible vs ASD-Probable	-0.588874	-1.17647	–	-0.00127617	0.292
12	theta	ncc	pars opercularis R	ASD-Unlikely vs ASD-Possible	-0.448015	-0.978577	–	0.082546	0.4
12	theta	ncc	pars opercularis R	ASD-Unlikely vs ASD-Probable	-0.755344	-1.34864	–	-0.162051	0.113
12	theta	ncc	pars opercularis R	ASD-Possible vs ASD-Probable	-0.307329	-0.892719	–	0.278062	0.655
12	theta	ncc	pars orbitalis L	ASD-Unlikely vs ASD-Possible	-0.161713	-0.592386	–	0.268961	0.758
12	theta	ncc	pars orbitalis L	ASD-Unlikely vs ASD-Probable	-0.514641	-1.02401	–	-0.00526853	0.292
12	theta	ncc	pars orbitalis L	ASD-Possible vs ASD-Probable	-0.352929	-0.859603	–	0.153745	0.519
12	theta	ncc	pars orbitalis R	ASD-Unlikely vs ASD-Possible	-0.0999587	-0.548733	–	0.348816	0.872
12	theta	ncc	pars orbitalis R	ASD-Unlikely vs ASD-Probable	-0.265308	-0.802331	–	0.271715	0.673
12	theta	ncc	pars orbitalis R	ASD-Possible vs ASD-Probable	-0.165349	-0.683237	–	0.352539	0.797
12	theta	ncc	pars triangularis L	ASD-Unlikely vs ASD-Possible	-0.0918176	-0.587308	–	0.403672	0.893
12	theta	ncc	pars triangularis L	ASD-Unlikely vs ASD-Probable	-0.298988	-0.878206	–	0.28023	0.655
12	theta	ncc	pars triangularis L	ASD-Possible vs ASD-Probable	-0.20717	-0.772866	–	0.358526	0.758
12	theta	ncc	pars triangularis R	ASD-Unlikely vs ASD-Possible	-0.218764	-0.7016	–	0.264072	0.709
12	theta	ncc	pars triangularis R	ASD-Unlikely vs ASD-Probable	-0.331846	-0.880676	–	0.216983	0.587
12	theta	ncc	pars triangularis R	ASD-Possible vs ASD-Probable	-0.113082	-0.659092	–	0.432927	0.884
12	theta	ncc	pericalcarine L	ASD-Unlikely vs ASD-Possible	0.0480175	-0.313767	–	0.409802	0.893
12	theta	ncc	pericalcarine L	ASD-Unlikely vs ASD-Probable	-0.0286993	-0.443485	–	0.386087	0.924
12	theta	ncc	pericalcarine L	ASD-Possible vs ASD-Probable	-0.0767168	-0.482699	–	0.329265	0.893
12	theta	ncc	pericalcarine R	ASD-Unlikely vs ASD-Possible	-0.303497	-0.624299	–	0.0173052	0.296
12	theta	ncc	pericalcarine R	ASD-Unlikely vs ASD-Probable	-0.460427	-0.835169	–	-0.085684	0.136
12	theta	ncc	pericalcarine R	ASD-Possible vs ASD-Probable	-0.15693	-0.526886	–	0.213027	0.726
12	theta	ncc	postcentral L	ASD-Unlikely vs ASD-Possible	0.0911135	-0.449109	–	0.631336	0.893
12	theta	ncc	postcentral L	ASD-Unlikely vs ASD-Probable	-0.503347	-1.11361	–	0.10692	0.4
12	theta	ncc	postcentral L	ASD-Possible vs ASD-Probable	-0.594461	-1.20549	–	0.0165641	0.292
12	theta	ncc	postcentral R	ASD-Unlikely vs ASD-Possible	-0.0584876	-0.589813	–	0.472838	0.893
12	theta	ncc	postcentral R	ASD-Unlikely vs ASD-Probable	-0.917761	-1.54338	–	-0.292139	0.063
12	theta	ncc	postcentral R	ASD-Possible vs ASD-Probable	-0.859273	-1.47469	–	-0.243856	0.074
12	theta	ncc	posterior cingulate L	ASD-Unlikely vs ASD-Possible	-0.339286	-0.866376	–	0.187805	0.587
12	theta	ncc	posterior cingulate L	ASD-Unlikely vs ASD-Probable	-0.418421	-1.02717	–	0.190328	0.519
12	theta	ncc	posterior cingulate L	ASD-Possible vs ASD-Probable	-0.0791356	-0.678822	–	0.520551	0.893
12	theta	ncc	posterior cingulate R	ASD-Unlikely vs ASD-Possible	-0.409903	-0.910874	–	0.091068	0.4
12	theta	ncc	posterior cingulate R	ASD-Unlikely vs ASD-Probable	-0.82187	-1.40611	–	-0.237631	0.074
12	theta	ncc	posterior cingulate R	ASD-Possible vs ASD-Probable	-0.411967	-0.977075	–	0.153142	0.486
12	theta	ncc	precentral L	ASD-Unlikely vs ASD-Possible	-0.212764	-0.774624	–	0.349096	0.758
12	theta	ncc	precentral L	ASD-Unlikely vs ASD-Probable	-0.583934	-1.2455	–	0.0776319	0.348
12	theta	ncc	precentral L	ASD-Possible vs ASD-Probable	-0.37117	-1.00353	–	0.261187	0.6
12	theta	ncc	precentral R	ASD-Unlikely vs ASD-Possible	-0.24521	-0.785295	–	0.294875	0.709
12	theta	ncc	precentral R	ASD-Unlikely vs ASD-Probable	-0.935049	-1.58032	–	-0.289779	0.066
12	theta	ncc	precentral R	ASD-Possible vs ASD-Probable	-0.689839	-1.31882	–	-0.0608607	0.239
12	theta	ncc	precuneus L	ASD-Unlikely vs ASD-Possible	0.095773	-0.300579	–	0.492125	0.853
12	theta	ncc	precuneus L	ASD-Unlikely vs ASD-Probable	-0.594474	-1.04342	–	-0.145532	0.101
12	theta	ncc	precuneus L	ASD-Possible vs ASD-Probable	-0.690247	-1.15198	–	-0.228514	0.058
12	theta	ncc	precuneus R	ASD-Unlikely vs ASD-Possible	-0.15252	-0.565223	–	0.260182	0.758
12	theta	ncc	precuneus R	ASD-Unlikely vs ASD-Probable	-0.618792	-1.09542	–	-0.142166	0.106
12	theta	ncc	precuneus R	ASD-Possible vs ASD-Probable	-0.466271	-0.940882	–	0.00833926	0.292
12	theta	ncc	rostral anterior cingulate L	ASD-Unlikely vs ASD-Possible	-0.165365	-0.583561	–	0.252831	0.756
12	theta	ncc	rostral anterior cingulate L	ASD-Unlikely vs ASD-Probable	-0.215633	-0.690822	–	0.259556	0.709
12	theta	ncc	rostral anterior cingulate L	ASD-Possible vs ASD-Probable	-0.0502676	-0.514923	–	0.414388	0.893
12	theta	ncc	rostral anterior cingulate R	ASD-Unlikely vs ASD-Possible	0.00707218	-0.399211	–	0.413355	0.982
12	theta	ncc	rostral anterior cingulate R	ASD-Unlikely vs ASD-Probable	-0.0588675	-0.527667	–	0.409932	0.893
12	theta	ncc	rostral anterior cingulate R	ASD-Possible vs ASD-Probable	-0.0659397	-0.522307	–	0.390427	0.893
12	theta	ncc	rostral middle frontal L	ASD-Unlikely vs ASD-Possible	-0.766482	-1.43911	–	-0.0938558	0.2
12	theta	ncc	rostral middle frontal L	ASD-Unlikely vs ASD-Probable	-0.881799	-1.63852	–	-0.125082	0.183
12	theta	ncc	rostral middle frontal L	ASD-Possible vs ASD-Probable	-0.115316	-0.832779	–	0.602146	0.893
12	theta	ncc	rostral middle frontal R	ASD-Unlikely vs ASD-Possible	-0.0835666	-0.695831	–	0.528697	0.893
12	theta	ncc	rostral middle frontal R	ASD-Unlikely vs ASD-Probable	-0.367268	-1.06668	–	0.332148	0.655
12	theta	ncc	rostral middle frontal R	ASD-Possible vs ASD-Probable	-0.283701	-0.950372	–	0.382969	0.726
12	theta	ncc	superior frontal L	ASD-Unlikely vs ASD-Possible	-0.0942003	-0.730934	–	0.542534	0.893
12	theta	ncc	superior frontal L	ASD-Unlikely vs ASD-Probable	-0.249977	-1.06614	–	0.566184	0.801
12	theta	ncc	superior frontal L	ASD-Possible vs ASD-Probable	-0.155777	-0.937297	–	0.625743	0.893
12	theta	ncc	superior frontal R	ASD-Unlikely vs ASD-Possible	0.179787	-0.343354	–	0.702928	0.776
12	theta	ncc	superior frontal R	ASD-Unlikely vs ASD-Probable	-0.325045	-0.984312	–	0.334222	0.673
12	theta	ncc	superior frontal R	ASD-Possible vs ASD-Probable	-0.504832	-1.11594	–	0.106277	0.4
12	theta	ncc	superior parietal L	ASD-Unlikely vs ASD-Possible	-0.0773187	-0.586166	–	0.431529	0.893
12	theta	ncc	superior parietal L	ASD-Unlikely vs ASD-Probable	-1.03274	-1.59071	–	-0.474774	0.019*
12	theta	ncc	superior parietal L	ASD-Possible vs ASD-Probable	-0.955424	-1.54883	–	-0.36202	0.043*
12	theta	ncc	superior parietal R	ASD-Unlikely vs ASD-Possible	-0.179327	-0.658601	–	0.299946	0.758
12	theta	ncc	superior parietal R	ASD-Unlikely vs ASD-Probable	-1.18428	-1.74897	–	-0.619591	0.008**
12	theta	ncc	superior parietal R	ASD-Possible vs ASD-Probable	-1.00495	-1.56708	–	-0.442822	0.023*
12	theta	ncc	superior temporal L	ASD-Unlikely vs ASD-Possible	-0.0552478	-0.504161	–	0.393666	0.893
12	theta	ncc	superior temporal L	ASD-Unlikely vs ASD-Probable	-0.582346	-1.12951	–	-0.0351769	0.261
12	theta	ncc	superior temporal L	ASD-Possible vs ASD-Probable	-0.527098	-1.05023	–	-0.00396973	0.292
12	theta	ncc	superior temporal R	ASD-Unlikely vs ASD-Possible	-0.132154	-0.594378	–	0.330071	0.819
12	theta	ncc	superior temporal R	ASD-Unlikely vs ASD-Probable	-0.570629	-1.10798	–	-0.0332827	0.261
12	theta	ncc	superior temporal R	ASD-Possible vs ASD-Probable	-0.438475	-0.961216	–	0.0842657	0.4
12	theta	ncc	supramarginal L	ASD-Unlikely vs ASD-Possible	-0.684953	-1.39509	–	0.0251879	0.292
12	theta	ncc	supramarginal L	ASD-Unlikely vs ASD-Probable	-0.75996	-1.54664	–	0.0267206	0.292
12	theta	ncc	supramarginal L	ASD-Possible vs ASD-Probable	-0.0750067	-0.842176	–	0.692163	0.901
12	theta	ncc	supramarginal R	ASD-Unlikely vs ASD-Possible	0.299192	-0.472931	–	1.07131	0.758
12	theta	ncc	supramarginal R	ASD-Unlikely vs ASD-Probable	-0.274291	-1.23075	–	0.682169	0.819
12	theta	ncc	supramarginal R	ASD-Possible vs ASD-Probable	-0.573482	-1.48734	–	0.340376	0.587
12	theta	ncc	temporal pole L	ASD-Unlikely vs ASD-Possible	-0.411721	-0.869618	–	0.0461754	0.339
12	theta	ncc	temporal pole L	ASD-Unlikely vs ASD-Probable	-0.687693	-1.22891	–	-0.146471	0.113
12	theta	ncc	temporal pole L	ASD-Possible vs ASD-Probable	-0.275971	-0.809766	–	0.257823	0.655
12	theta	ncc	temporal pole R	ASD-Unlikely vs ASD-Possible	0.0945731	-0.314099	–	0.503245	0.865
12	theta	ncc	temporal pole R	ASD-Unlikely vs ASD-Probable	-0.300339	-0.795775	–	0.195096	0.587
12	theta	ncc	temporal pole R	ASD-Possible vs ASD-Probable	-0.394913	-0.877157	–	0.0873321	0.4
12	theta	ncc	transverse temporal L	ASD-Unlikely vs ASD-Possible	0.069317	-0.448022	–	0.586657	0.893
12	theta	ncc	transverse temporal L	ASD-Unlikely vs ASD-Probable	-0.0799546	-0.700474	–	0.540564	0.893
12	theta	ncc	transverse temporal L	ASD-Possible vs ASD-Probable	-0.149272	-0.738991	–	0.440448	0.851
12	theta	ncc	transverse temporal R	ASD-Unlikely vs ASD-Possible	-0.0517447	-0.603939	–	0.500449	0.903
12	theta	ncc	transverse temporal R	ASD-Unlikely vs ASD-Probable	-1.14194	-1.83707	–	-0.446796	0.043*
12	theta	ncc	transverse temporal R	ASD-Possible vs ASD-Probable	-1.09019	-1.76387	–	-0.416514	0.043*
12	theta	npl	bankssts L	ASD-Unlikely vs ASD-Possible	-0.123893	-0.338833	–	0.0910477	0.687
12	theta	npl	bankssts L	ASD-Unlikely vs ASD-Probable	-0.169411	-0.430363	–	0.0915419	0.592
12	theta	npl	bankssts L	ASD-Possible vs ASD-Probable	-0.045518	-0.281457	–	0.19042	0.849
12	theta	npl	bankssts R	ASD-Unlikely vs ASD-Possible	-0.183987	-0.318442	–	-0.0495333	0.442
12	theta	npl	bankssts R	ASD-Unlikely vs ASD-Probable	-0.129709	-0.291932	–	0.0325154	0.519
12	theta	npl	bankssts R	ASD-Possible vs ASD-Probable	0.0542788	-0.0939277	–	0.202485	0.731
12	theta	npl	caudal anterior cingulate L	ASD-Unlikely vs ASD-Possible	0.00529325	-0.170701	–	0.181287	0.979
12	theta	npl	caudal anterior cingulate L	ASD-Unlikely vs ASD-Probable	-0.22207	-0.436906	–	-0.00723384	0.478
12	theta	npl	caudal anterior cingulate L	ASD-Possible vs ASD-Probable	-0.227363	-0.422303	–	-0.032423	0.478
12	theta	npl	caudal anterior cingulate R	ASD-Unlikely vs ASD-Possible	-0.0308079	-0.224052	–	0.162436	0.877
12	theta	npl	caudal anterior cingulate R	ASD-Unlikely vs ASD-Probable	-0.202611	-0.437703	–	0.0324805	0.497
12	theta	npl	caudal anterior cingulate R	ASD-Possible vs ASD-Probable	-0.171803	-0.3864	–	0.0427938	0.519
12	theta	npl	caudal middle frontal L	ASD-Unlikely vs ASD-Possible	-0.0219724	-0.201334	–	0.15739	0.918
12	theta	npl	caudal middle frontal L	ASD-Unlikely vs ASD-Probable	-0.0968883	-0.312548	–	0.118771	0.728
12	theta	npl	caudal middle frontal L	ASD-Possible vs ASD-Probable	-0.0749159	-0.270932	–	0.121101	0.728
12	theta	npl	caudal middle frontal R	ASD-Unlikely vs ASD-Possible	-0.12907	-0.324426	–	0.0662856	0.586
12	theta	npl	caudal middle frontal R	ASD-Unlikely vs ASD-Probable	-0.327301	-0.563764	–	-0.0908382	0.442
12	theta	npl	caudal middle frontal R	ASD-Possible vs ASD-Probable	-0.198231	-0.412892	–	0.0164308	0.483
12	theta	npl	cuneus L	ASD-Unlikely vs ASD-Possible	-0.125836	-0.302263	–	0.0505901	0.584
12	theta	npl	cuneus L	ASD-Unlikely vs ASD-Probable	-0.196365	-0.409116	–	0.0163857	0.483
12	theta	npl	cuneus L	ASD-Possible vs ASD-Probable	-0.0705287	-0.262585	–	0.121528	0.731
12	theta	npl	cuneus R	ASD-Unlikely vs ASD-Possible	-0.0606268	-0.267496	–	0.146242	0.781
12	theta	npl	cuneus R	ASD-Unlikely vs ASD-Probable	-0.1064	-0.352764	–	0.139964	0.728
12	theta	npl	cuneus R	ASD-Possible vs ASD-Probable	-0.0457735	-0.271355	–	0.179808	0.844
12	theta	npl	entorhinal L	ASD-Unlikely vs ASD-Possible	-0.00460945	-0.0867227	–	0.0775038	0.966
12	theta	npl	entorhinal L	ASD-Unlikely vs ASD-Probable	-0.0967742	-0.197447	–	0.00389816	0.483
12	theta	npl	entorhinal L	ASD-Possible vs ASD-Probable	-0.0921648	-0.184388	–	5.8708e-05	0.483
12	theta	npl	entorhinal R	ASD-Unlikely vs ASD-Possible	0.0369504	-0.0705082	–	0.144409	0.75
12	theta	npl	entorhinal R	ASD-Unlikely vs ASD-Probable	-0.0546348	-0.188349	–	0.0790793	0.728
12	theta	npl	entorhinal R	ASD-Possible vs ASD-Probable	-0.0915852	-0.214048	–	0.0308778	0.561
12	theta	npl	frontal pole L	ASD-Unlikely vs ASD-Possible	0.0140879	-0.0885815	–	0.116757	0.903
12	theta	npl	frontal pole L	ASD-Unlikely vs ASD-Probable	-0.0481761	-0.173558	–	0.0772061	0.728
12	theta	npl	frontal pole L	ASD-Possible vs ASD-Probable	-0.0622639	-0.177532	–	0.0530039	0.687
12	theta	npl	frontal pole R	ASD-Unlikely vs ASD-Possible	-0.0099702	-0.139938	–	0.119997	0.966
12	theta	npl	frontal pole R	ASD-Unlikely vs ASD-Probable	-0.0536349	-0.211293	–	0.104023	0.75
12	theta	npl	frontal pole R	ASD-Possible vs ASD-Probable	-0.0436647	-0.188762	–	0.101433	0.78
12	theta	npl	fusiform L	ASD-Unlikely vs ASD-Possible	-0.0447619	-0.145367	–	0.0558427	0.728
12	theta	npl	fusiform L	ASD-Unlikely vs ASD-Probable	-0.0487678	-0.173781	–	0.0762451	0.728
12	theta	npl	fusiform L	ASD-Possible vs ASD-Probable	-0.00400584	-0.117589	–	0.109577	0.979
12	theta	npl	fusiform R	ASD-Unlikely vs ASD-Possible	-0.110886	-0.215419	–	-0.00635299	0.478
12	theta	npl	fusiform R	ASD-Unlikely vs ASD-Probable	-0.111896	-0.239328	–	0.0155368	0.497
12	theta	npl	fusiform R	ASD-Possible vs ASD-Probable	-0.0010095	-0.117759	–	0.11574	0.986
12	theta	npl	inferior parietal L	ASD-Unlikely vs ASD-Possible	-0.0442427	-0.269747	–	0.181262	0.849
12	theta	npl	inferior parietal L	ASD-Unlikely vs ASD-Probable	-0.11715	-0.386424	–	0.152123	0.728
12	theta	npl	inferior parietal L	ASD-Possible vs ASD-Probable	-0.0729076	-0.31715	–	0.171335	0.78
12	theta	npl	inferior parietal R	ASD-Unlikely vs ASD-Possible	-0.0834011	-0.322066	–	0.155264	0.75
12	theta	npl	inferior parietal R	ASD-Unlikely vs ASD-Probable	-0.0918154	-0.383769	–	0.200138	0.771
12	theta	npl	inferior parietal R	ASD-Possible vs ASD-Probable	-0.00841435	-0.273518	–	0.256689	0.979
12	theta	npl	inferior temporal L	ASD-Unlikely vs ASD-Possible	-0.0229129	-0.144066	–	0.0982407	0.849
12	theta	npl	inferior temporal L	ASD-Unlikely vs ASD-Probable	-0.0101218	-0.161036	–	0.140792	0.966
12	theta	npl	inferior temporal L	ASD-Possible vs ASD-Probable	0.012791	-0.124095	–	0.149677	0.954
12	theta	npl	inferior temporal R	ASD-Unlikely vs ASD-Possible	-0.145922	-0.254878	–	-0.0369646	0.442
12	theta	npl	inferior temporal R	ASD-Unlikely vs ASD-Probable	-0.144663	-0.278617	–	-0.0107085	0.478
12	theta	npl	inferior temporal R	ASD-Possible vs ASD-Probable	0.00125865	-0.121177	–	0.123694	0.986
12	theta	npl	insula L	ASD-Unlikely vs ASD-Possible	0.00772825	-0.112007	–	0.127463	0.966
12	theta	npl	insula L	ASD-Unlikely vs ASD-Probable	-0.0550075	-0.202224	–	0.092209	0.729
12	theta	npl	insula L	ASD-Possible vs ASD-Probable	-0.0627357	-0.197798	–	0.0723263	0.719
12	theta	npl	insula R	ASD-Unlikely vs ASD-Possible	0.0271041	-0.0690983	–	0.123306	0.79
12	theta	npl	insula R	ASD-Unlikely vs ASD-Probable	-0.0184351	-0.136972	–	0.100102	0.877
12	theta	npl	insula R	ASD-Possible vs ASD-Probable	-0.0455392	-0.153892	–	0.0628132	0.728
12	theta	npl	isthmus cingulate L	ASD-Unlikely vs ASD-Possible	0.0208393	-0.0515038	–	0.0931823	0.784
12	theta	npl	isthmus cingulate L	ASD-Unlikely vs ASD-Probable	-0.100774	-0.188635	–	-0.0129134	0.478
12	theta	npl	isthmus cingulate L	ASD-Possible vs ASD-Probable	-0.121613	-0.202362	–	-0.0408642	0.442
12	theta	npl	isthmus cingulate R	ASD-Unlikely vs ASD-Possible	0.0260742	-0.101153	–	0.153301	0.844
12	theta	npl	isthmus cingulate R	ASD-Unlikely vs ASD-Probable	-0.102599	-0.256216	–	0.0510175	0.584
12	theta	npl	isthmus cingulate R	ASD-Possible vs ASD-Probable	-0.128673	-0.269731	–	0.0123842	0.483
12	theta	npl	lateral occipital L	ASD-Unlikely vs ASD-Possible	-0.0923295	-0.259566	–	0.0749064	0.687
12	theta	npl	lateral occipital L	ASD-Unlikely vs ASD-Probable	-0.165257	-0.364849	–	0.0343341	0.497
12	theta	npl	lateral occipital L	ASD-Possible vs ASD-Probable	-0.0729279	-0.255838	–	0.109982	0.728
12	theta	npl	lateral occipital R	ASD-Unlikely vs ASD-Possible	-0.0863332	-0.253027	–	0.0803608	0.695
12	theta	npl	lateral occipital R	ASD-Unlikely vs ASD-Probable	-0.15851	-0.358135	–	0.0411149	0.519
12	theta	npl	lateral occipital R	ASD-Possible vs ASD-Probable	-0.0721768	-0.256611	–	0.112257	0.728
12	theta	npl	lateral orbitofrontal L	ASD-Unlikely vs ASD-Possible	0.00915699	-0.0896561	–	0.10797	0.954
12	theta	npl	lateral orbitofrontal L	ASD-Unlikely vs ASD-Probable	-0.0698962	-0.191906	–	0.0521136	0.687
12	theta	npl	lateral orbitofrontal L	ASD-Possible vs ASD-Probable	-0.0790532	-0.190915	–	0.0328087	0.584
12	theta	npl	lateral orbitofrontal R	ASD-Unlikely vs ASD-Possible	-0.0068089	-0.102632	–	0.0890141	0.966
12	theta	npl	lateral orbitofrontal R	ASD-Unlikely vs ASD-Probable	-0.0972841	-0.214825	–	0.0202571	0.497
12	theta	npl	lateral orbitofrontal R	ASD-Possible vs ASD-Probable	-0.0904752	-0.198552	–	0.0176017	0.497
12	theta	npl	lingual L	ASD-Unlikely vs ASD-Possible	0.0404229	-0.111779	–	0.192625	0.809
12	theta	npl	lingual L	ASD-Unlikely vs ASD-Probable	-0.0133518	-0.197673	–	0.170969	0.966
12	theta	npl	lingual L	ASD-Possible vs ASD-Probable	-0.0537747	-0.22356	–	0.116011	0.771
12	theta	npl	lingual R	ASD-Unlikely vs ASD-Possible	0.0484755	-0.0685552	–	0.165506	0.728
12	theta	npl	lingual R	ASD-Unlikely vs ASD-Probable	-0.0995375	-0.241752	–	0.0426772	0.584
12	theta	npl	lingual R	ASD-Possible vs ASD-Probable	-0.148013	-0.279025	–	-0.0170014	0.478
12	theta	npl	medial orbitofrontal L	ASD-Unlikely vs ASD-Possible	0.00308567	-0.0690656	–	0.075237	0.979
12	theta	npl	medial orbitofrontal L	ASD-Unlikely vs ASD-Probable	-0.0423958	-0.130838	–	0.0460463	0.716
12	theta	npl	medial orbitofrontal L	ASD-Possible vs ASD-Probable	-0.0454815	-0.126795	–	0.0358317	0.687
12	theta	npl	medial orbitofrontal R	ASD-Unlikely vs ASD-Possible	0.0504289	-0.0398377	–	0.140696	0.687
12	theta	npl	medial orbitofrontal R	ASD-Unlikely vs ASD-Probable	-0.04187	-0.152164	–	0.0684242	0.728
12	theta	npl	medial orbitofrontal R	ASD-Possible vs ASD-Probable	-0.092299	-0.193774	–	0.00917586	0.483
12	theta	npl	middle temporal L	ASD-Unlikely vs ASD-Possible	-0.102074	-0.229751	–	0.0256027	0.519
12	theta	npl	middle temporal L	ASD-Unlikely vs ASD-Probable	-0.105722	-0.26241	–	0.0509652	0.584
12	theta	npl	middle temporal L	ASD-Possible vs ASD-Probable	-0.00364817	-0.146752	–	0.139455	0.979
12	theta	npl	middle temporal R	ASD-Unlikely vs ASD-Possible	-0.0613793	-0.170844	–	0.048085	0.687
12	theta	npl	middle temporal R	ASD-Unlikely vs ASD-Probable	0.0291379	-0.104394	–	0.16267	0.837
12	theta	npl	middle temporal R	ASD-Possible vs ASD-Probable	0.0905172	-0.0314365	–	0.212471	0.561
12	theta	npl	paracentral L	ASD-Unlikely vs ASD-Possible	-0.120658	-0.343998	–	0.102682	0.687
12	theta	npl	paracentral L	ASD-Unlikely vs ASD-Probable	-0.245531	-0.511825	–	0.0207637	0.483
12	theta	npl	paracentral L	ASD-Possible vs ASD-Probable	-0.124873	-0.367724	–	0.117979	0.695
12	theta	npl	paracentral R	ASD-Unlikely vs ASD-Possible	-0.0521378	-0.263422	–	0.159146	0.817
12	theta	npl	paracentral R	ASD-Unlikely vs ASD-Probable	-0.130562	-0.381989	–	0.120865	0.695
12	theta	npl	paracentral R	ASD-Possible vs ASD-Probable	-0.0784244	-0.310148	–	0.153299	0.75
12	theta	npl	parahippocampal L	ASD-Unlikely vs ASD-Possible	-0.0315616	-0.13268	–	0.0695569	0.771
12	theta	npl	parahippocampal L	ASD-Unlikely vs ASD-Probable	-0.0950604	-0.218768	–	0.0286474	0.55
12	theta	npl	parahippocampal L	ASD-Possible vs ASD-Probable	-0.0634989	-0.177279	–	0.0502814	0.687
12	theta	npl	parahippocampal R	ASD-Unlikely vs ASD-Possible	-0.0428297	-0.154884	–	0.0692251	0.728
12	theta	npl	parahippocampal R	ASD-Unlikely vs ASD-Probable	-0.129979	-0.267139	–	0.00718179	0.483
12	theta	npl	parahippocampal R	ASD-Possible vs ASD-Probable	-0.0871488	-0.212558	–	0.0382599	0.584
12	theta	npl	pars opercularis L	ASD-Unlikely vs ASD-Possible	-0.0455796	-0.165391	–	0.0742319	0.728
12	theta	npl	pars opercularis L	ASD-Unlikely vs ASD-Probable	-0.158351	-0.305284	–	-0.0114188	0.478
12	theta	npl	pars opercularis L	ASD-Possible vs ASD-Probable	-0.112772	-0.245942	–	0.0203984	0.497
12	theta	npl	pars opercularis R	ASD-Unlikely vs ASD-Possible	-0.0455243	-0.194168	–	0.10312	0.777
12	theta	npl	pars opercularis R	ASD-Unlikely vs ASD-Probable	-0.0843403	-0.263478	–	0.0947972	0.719
12	theta	npl	pars opercularis R	ASD-Possible vs ASD-Probable	-0.038816	-0.202807	–	0.125175	0.825
12	theta	npl	pars orbitalis L	ASD-Unlikely vs ASD-Possible	-0.0262172	-0.120237	–	0.0678022	0.79
12	theta	npl	pars orbitalis L	ASD-Unlikely vs ASD-Probable	-0.059638	-0.174175	–	0.0548994	0.695
12	theta	npl	pars orbitalis L	ASD-Possible vs ASD-Probable	-0.0334208	-0.138893	–	0.0720512	0.771
12	theta	npl	pars orbitalis R	ASD-Unlikely vs ASD-Possible	-0.0255504	-0.131037	–	0.0799363	0.82
12	theta	npl	pars orbitalis R	ASD-Unlikely vs ASD-Probable	-0.0452836	-0.175771	–	0.0852035	0.75
12	theta	npl	pars orbitalis R	ASD-Possible vs ASD-Probable	-0.0197332	-0.139095	–	0.0996281	0.875
12	theta	npl	pars triangularis L	ASD-Unlikely vs ASD-Possible	-0.0249055	-0.144299	–	0.0944885	0.844
12	theta	npl	pars triangularis L	ASD-Unlikely vs ASD-Probable	-0.16777	-0.314536	–	-0.0210041	0.478
12	theta	npl	pars triangularis L	ASD-Possible vs ASD-Probable	-0.142864	-0.276701	–	-0.00902758	0.478
12	theta	npl	pars triangularis R	ASD-Unlikely vs ASD-Possible	-0.0775091	-0.219698	–	0.0646795	0.687
12	theta	npl	pars triangularis R	ASD-Unlikely vs ASD-Probable	-0.174246	-0.344252	–	-0.00424065	0.478
12	theta	npl	pars triangularis R	ASD-Possible vs ASD-Probable	-0.0967371	-0.253296	–	0.0598216	0.649
12	theta	npl	pericalcarine L	ASD-Unlikely vs ASD-Possible	-0.0954163	-0.267084	–	0.0762518	0.687
12	theta	npl	pericalcarine L	ASD-Unlikely vs ASD-Probable	-0.194336	-0.400718	–	0.012047	0.483
12	theta	npl	pericalcarine L	ASD-Possible vs ASD-Probable	-0.0989195	-0.287944	–	0.0901054	0.695
12	theta	npl	pericalcarine R	ASD-Unlikely vs ASD-Possible	-0.0524844	-0.206189	–	0.10122	0.75
12	theta	npl	pericalcarine R	ASD-Unlikely vs ASD-Probable	-0.167963	-0.35284	–	0.0169133	0.483
12	theta	npl	pericalcarine R	ASD-Possible vs ASD-Probable	-0.115479	-0.286614	–	0.0556564	0.584
12	theta	npl	postcentral L	ASD-Unlikely vs ASD-Possible	-0.0849924	-0.261539	–	0.0915542	0.716
12	theta	npl	postcentral L	ASD-Unlikely vs ASD-Probable	-0.192153	-0.404201	–	0.019895	0.483
12	theta	npl	postcentral L	ASD-Possible vs ASD-Probable	-0.107161	-0.301597	–	0.0872751	0.687
12	theta	npl	postcentral R	ASD-Unlikely vs ASD-Possible	-0.179812	-0.335526	–	-0.0240983	0.478
12	theta	npl	postcentral R	ASD-Unlikely vs ASD-Probable	-0.193321	-0.37921	–	-0.0074316	0.478
12	theta	npl	postcentral R	ASD-Possible vs ASD-Probable	-0.0135087	-0.183251	–	0.156234	0.966
12	theta	npl	posterior cingulate L	ASD-Unlikely vs ASD-Possible	-0.0524483	-0.258844	–	0.153948	0.813
12	theta	npl	posterior cingulate L	ASD-Unlikely vs ASD-Probable	-0.165216	-0.413363	–	0.0829303	0.584
12	theta	npl	posterior cingulate L	ASD-Possible vs ASD-Probable	-0.112768	-0.33825	–	0.112714	0.699
12	theta	npl	posterior cingulate R	ASD-Unlikely vs ASD-Possible	-0.0534205	-0.23609	–	0.12925	0.781
12	theta	npl	posterior cingulate R	ASD-Unlikely vs ASD-Probable	-0.162635	-0.381137	–	0.0558661	0.561
12	theta	npl	posterior cingulate R	ASD-Possible vs ASD-Probable	-0.109215	-0.308763	–	0.090333	0.687
12	theta	npl	precentral L	ASD-Unlikely vs ASD-Possible	-0.00562324	-0.154985	–	0.143739	0.979
12	theta	npl	precentral L	ASD-Unlikely vs ASD-Probable	-0.0695337	-0.252643	–	0.113576	0.728
12	theta	npl	precentral L	ASD-Possible vs ASD-Probable	-0.0639104	-0.229722	–	0.101902	0.728
12	theta	npl	precentral R	ASD-Unlikely vs ASD-Possible	-0.0653423	-0.236524	–	0.105839	0.728
12	theta	npl	precentral R	ASD-Unlikely vs ASD-Probable	-0.192039	-0.394817	–	0.0107396	0.483
12	theta	npl	precentral R	ASD-Possible vs ASD-Probable	-0.126696	-0.312813	–	0.0594204	0.584
12	theta	npl	precuneus L	ASD-Unlikely vs ASD-Possible	0.0362282	-0.182025	–	0.254482	0.875
12	theta	npl	precuneus L	ASD-Unlikely vs ASD-Probable	-0.0574795	-0.319713	–	0.204754	0.837
12	theta	npl	precuneus L	ASD-Possible vs ASD-Probable	-0.0937077	-0.329486	–	0.142071	0.728
12	theta	npl	precuneus R	ASD-Unlikely vs ASD-Possible	-0.00661633	-0.254184	–	0.240952	0.979
12	theta	npl	precuneus R	ASD-Unlikely vs ASD-Probable	-0.133934	-0.435493	–	0.167625	0.728
12	theta	npl	precuneus R	ASD-Possible vs ASD-Probable	-0.127317	-0.401744	–	0.14711	0.719
12	theta	npl	rostral anterior cingulate L	ASD-Unlikely vs ASD-Possible	-0.0503627	-0.161922	–	0.0611966	0.728
12	theta	npl	rostral anterior cingulate L	ASD-Unlikely vs ASD-Probable	-0.103415	-0.239744	–	0.0329141	0.559
12	theta	npl	rostral anterior cingulate L	ASD-Possible vs ASD-Probable	-0.0530523	-0.178379	–	0.0722742	0.728
12	theta	npl	rostral anterior cingulate R	ASD-Unlikely vs ASD-Possible	-0.00453918	-0.0835828	–	0.0745044	0.966
12	theta	npl	rostral anterior cingulate R	ASD-Unlikely vs ASD-Probable	-0.0486551	-0.145021	–	0.0477112	0.699
12	theta	npl	rostral anterior cingulate R	ASD-Possible vs ASD-Probable	-0.044116	-0.132645	–	0.0444133	0.699
12	theta	npl	rostral middle frontal L	ASD-Unlikely vs ASD-Possible	-0.0875383	-0.217972	–	0.0428955	0.584
12	theta	npl	rostral middle frontal L	ASD-Unlikely vs ASD-Probable	-0.142661	-0.303114	–	0.0177914	0.497
12	theta	npl	rostral middle frontal L	ASD-Possible vs ASD-Probable	-0.0551229	-0.202745	–	0.0924992	0.729
12	theta	npl	rostral middle frontal R	ASD-Unlikely vs ASD-Possible	-0.0854493	-0.236977	–	0.0660783	0.687
12	theta	npl	rostral middle frontal R	ASD-Unlikely vs ASD-Probable	-0.167434	-0.351069	–	0.0162011	0.483
12	theta	npl	rostral middle frontal R	ASD-Possible vs ASD-Probable	-0.0819848	-0.250313	–	0.0863435	0.715
12	theta	npl	superior frontal L	ASD-Unlikely vs ASD-Possible	0.0234298	-0.17643	–	0.22329	0.922
12	theta	npl	superior frontal L	ASD-Unlikely vs ASD-Probable	-0.203759	-0.440408	–	0.0328893	0.497
12	theta	npl	superior frontal L	ASD-Possible vs ASD-Probable	-0.227189	-0.445238	–	-0.00914059	0.478
12	theta	npl	superior frontal R	ASD-Unlikely vs ASD-Possible	0.029434	-0.131297	–	0.190165	0.854
12	theta	npl	superior frontal R	ASD-Unlikely vs ASD-Probable	-0.168371	-0.360528	–	0.0237858	0.497
12	theta	npl	superior frontal R	ASD-Possible vs ASD-Probable	-0.197805	-0.37322	–	-0.0223896	0.478
12	theta	npl	superior parietal L	ASD-Unlikely vs ASD-Possible	-0.0327933	-0.277256	–	0.211669	0.903
12	theta	npl	superior parietal L	ASD-Unlikely vs ASD-Probable	-0.0163062	-0.313106	–	0.280493	0.966
12	theta	npl	superior parietal L	ASD-Possible vs ASD-Probable	0.0164871	-0.253305	–	0.28628	0.966
12	theta	npl	superior parietal R	ASD-Unlikely vs ASD-Possible	-0.109673	-0.324751	–	0.105406	0.697
12	theta	npl	superior parietal R	ASD-Unlikely vs ASD-Probable	-0.187368	-0.44367	–	0.0689345	0.563
12	theta	npl	superior parietal R	ASD-Possible vs ASD-Probable	-0.077695	-0.311872	–	0.156483	0.757
12	theta	npl	superior temporal L	ASD-Unlikely vs ASD-Possible	-0.102903	-0.243388	–	0.0375816	0.563
12	theta	npl	superior temporal L	ASD-Unlikely vs ASD-Probable	-0.066914	-0.236973	–	0.103145	0.728
12	theta	npl	superior temporal L	ASD-Possible vs ASD-Probable	0.0359892	-0.120137	–	0.192116	0.831
12	theta	npl	superior temporal R	ASD-Unlikely vs ASD-Possible	-0.0812667	-0.200024	–	0.0374906	0.584
12	theta	npl	superior temporal R	ASD-Unlikely vs ASD-Probable	-0.150108	-0.294698	–	-0.00551688	0.478
12	theta	npl	superior temporal R	ASD-Possible vs ASD-Probable	-0.0688408	-0.200995	–	0.0633138	0.695
12	theta	npl	supramarginal L	ASD-Unlikely vs ASD-Possible	-0.134342	-0.340982	–	0.0722972	0.592
12	theta	npl	supramarginal L	ASD-Unlikely vs ASD-Probable	-0.194046	-0.443102	–	0.0550107	0.539
12	theta	npl	supramarginal L	ASD-Possible vs ASD-Probable	-0.0597033	-0.287581	–	0.168174	0.81
12	theta	npl	supramarginal R	ASD-Unlikely vs ASD-Possible	-0.0921512	-0.261264	–	0.076962	0.687
12	theta	npl	supramarginal R	ASD-Unlikely vs ASD-Probable	-0.138842	-0.340704	–	0.0630201	0.584
12	theta	npl	supramarginal R	ASD-Possible vs ASD-Probable	-0.0466908	-0.23235	–	0.138968	0.813
12	theta	npl	temporal pole L	ASD-Unlikely vs ASD-Possible	-0.0803407	-0.176995	–	0.0163133	0.497
12	theta	npl	temporal pole L	ASD-Unlikely vs ASD-Probable	-0.100648	-0.218021	–	0.0167241	0.497
12	theta	npl	temporal pole L	ASD-Possible vs ASD-Probable	-0.0203076	-0.127898	–	0.0872828	0.849
12	theta	npl	temporal pole R	ASD-Unlikely vs ASD-Possible	0.0222715	-0.0766488	–	0.121192	0.835
12	theta	npl	temporal pole R	ASD-Unlikely vs ASD-Probable	-0.00120424	-0.122571	–	0.120162	0.986
12	theta	npl	temporal pole R	ASD-Possible vs ASD-Probable	-0.0234758	-0.134669	–	0.0877171	0.844
12	theta	npl	transverse temporal L	ASD-Unlikely vs ASD-Possible	-0.0603085	-0.188588	–	0.0679708	0.719
12	theta	npl	transverse temporal L	ASD-Unlikely vs ASD-Probable	-0.0245408	-0.179585	–	0.130503	0.877
12	theta	npl	transverse temporal L	ASD-Possible vs ASD-Probable	0.0357677	-0.105587	–	0.177122	0.813
12	theta	npl	transverse temporal R	ASD-Unlikely vs ASD-Possible	-0.0527901	-0.180778	–	0.075198	0.728
12	theta	npl	transverse temporal R	ASD-Unlikely vs ASD-Probable	0.00144045	-0.1551	–	0.157981	0.986
12	theta	npl	transverse temporal R	ASD-Possible vs ASD-Probable	0.0542305	-0.0877893	–	0.19625	0.728
12	alpha	ncc	bankssts L	ASD-Unlikely vs ASD-Possible	-0.0337201	-0.77016	–	0.70272	0.976
12	alpha	ncc	bankssts L	ASD-Unlikely vs ASD-Probable	-0.111245	-1.05009	–	0.827601	0.946
12	alpha	ncc	bankssts L	ASD-Possible vs ASD-Probable	-0.0775253	-0.956775	–	0.801725	0.951
12	alpha	ncc	bankssts R	ASD-Unlikely vs ASD-Possible	-0.0962768	-0.688422	–	0.495869	0.916
12	alpha	ncc	bankssts R	ASD-Unlikely vs ASD-Probable	-0.420776	-1.11607	–	0.274517	0.795
12	alpha	ncc	bankssts R	ASD-Possible vs ASD-Probable	-0.324499	-0.975516	–	0.326517	0.85
12	alpha	ncc	caudal anterior cingulate L	ASD-Unlikely vs ASD-Possible	-0.0342581	-0.33906	–	0.270544	0.946
12	alpha	ncc	caudal anterior cingulate L	ASD-Unlikely vs ASD-Probable	-0.123154	-0.484168	–	0.23786	0.916
12	alpha	ncc	caudal anterior cingulate L	ASD-Possible vs ASD-Probable	-0.0888956	-0.441675	–	0.263884	0.916
12	alpha	ncc	caudal anterior cingulate R	ASD-Unlikely vs ASD-Possible	-0.170788	-0.528326	–	0.18675	0.85
12	alpha	ncc	caudal anterior cingulate R	ASD-Unlikely vs ASD-Probable	-0.135546	-0.552876	–	0.281785	0.916
12	alpha	ncc	caudal anterior cingulate R	ASD-Possible vs ASD-Probable	0.0352424	-0.381185	–	0.45167	0.951
12	alpha	ncc	caudal middle frontal L	ASD-Unlikely vs ASD-Possible	-0.382092	-0.771714	–	0.00753069	0.453
12	alpha	ncc	caudal middle frontal L	ASD-Unlikely vs ASD-Probable	0.0398878	-0.422767	–	0.502542	0.951
12	alpha	ncc	caudal middle frontal L	ASD-Possible vs ASD-Probable	0.42198	-0.0214042	–	0.865363	0.453
12	alpha	ncc	caudal middle frontal R	ASD-Unlikely vs ASD-Possible	0.305171	-0.189723	–	0.800065	0.792
12	alpha	ncc	caudal middle frontal R	ASD-Unlikely vs ASD-Probable	0.173185	-0.40112	–	0.747489	0.916
12	alpha	ncc	caudal middle frontal R	ASD-Possible vs ASD-Probable	-0.131987	-0.666516	–	0.402543	0.916
12	alpha	ncc	cuneus L	ASD-Unlikely vs ASD-Possible	0.155324	-0.338671	–	0.649319	0.916
12	alpha	ncc	cuneus L	ASD-Unlikely vs ASD-Probable	-0.893515	-1.48348	–	-0.30355	0.102
12	alpha	ncc	cuneus L	ASD-Possible vs ASD-Probable	-1.04884	-1.62109	–	-0.476587	0.067
12	alpha	ncc	cuneus R	ASD-Unlikely vs ASD-Possible	0.0315321	-0.543116	–	0.60618	0.972
12	alpha	ncc	cuneus R	ASD-Unlikely vs ASD-Probable	-0.425238	-1.11049	–	0.260014	0.792
12	alpha	ncc	cuneus R	ASD-Possible vs ASD-Probable	-0.456771	-1.12638	–	0.212836	0.775
12	alpha	ncc	entorhinal L	ASD-Unlikely vs ASD-Possible	-0.133549	-0.522863	–	0.255765	0.916
12	alpha	ncc	entorhinal L	ASD-Unlikely vs ASD-Probable	-0.199336	-0.647598	–	0.248926	0.85
12	alpha	ncc	entorhinal L	ASD-Possible vs ASD-Probable	-0.0657867	-0.519198	–	0.387625	0.926
12	alpha	ncc	entorhinal R	ASD-Unlikely vs ASD-Possible	0.0652482	-0.29311	–	0.423606	0.916
12	alpha	ncc	entorhinal R	ASD-Unlikely vs ASD-Probable	-0.591192	-1.02576	–	-0.156623	0.223
12	alpha	ncc	entorhinal R	ASD-Possible vs ASD-Probable	-0.656441	-1.07815	–	-0.234735	0.102
12	alpha	ncc	frontal pole L	ASD-Unlikely vs ASD-Possible	0.255109	-0.251269	–	0.761487	0.85
12	alpha	ncc	frontal pole L	ASD-Unlikely vs ASD-Probable	-0.00774849	-0.584596	–	0.569099	0.997
12	alpha	ncc	frontal pole L	ASD-Possible vs ASD-Probable	-0.262857	-0.835014	–	0.309299	0.85
12	alpha	ncc	frontal pole R	ASD-Unlikely vs ASD-Possible	0.108936	-0.386737	–	0.604609	0.916
12	alpha	ncc	frontal pole R	ASD-Unlikely vs ASD-Probable	-0.286519	-0.84075	–	0.267713	0.85
12	alpha	ncc	frontal pole R	ASD-Possible vs ASD-Probable	-0.395454	-0.954865	–	0.163956	0.769
12	alpha	ncc	fusiform L	ASD-Unlikely vs ASD-Possible	0.00498751	-0.469076	–	0.479051	0.997
12	alpha	ncc	fusiform L	ASD-Unlikely vs ASD-Probable	-0.230518	-0.801698	–	0.340663	0.85
12	alpha	ncc	fusiform L	ASD-Possible vs ASD-Probable	-0.235505	-0.804687	–	0.333677	0.85
12	alpha	ncc	fusiform R	ASD-Unlikely vs ASD-Possible	0.118825	-0.335422	–	0.573072	0.916
12	alpha	ncc	fusiform R	ASD-Unlikely vs ASD-Probable	-0.494641	-1.0294	–	0.0401176	0.491
12	alpha	ncc	fusiform R	ASD-Possible vs ASD-Probable	-0.613466	-1.12059	–	-0.106345	0.273
12	alpha	ncc	inferior parietal L	ASD-Unlikely vs ASD-Possible	-0.151282	-0.848706	–	0.546141	0.916
12	alpha	ncc	inferior parietal L	ASD-Unlikely vs ASD-Probable	-0.431556	-1.24179	–	0.378679	0.85
12	alpha	ncc	inferior parietal L	ASD-Possible vs ASD-Probable	-0.280273	-1.11134	–	0.550793	0.916
12	alpha	ncc	inferior parietal R	ASD-Unlikely vs ASD-Possible	-0.269523	-1.02997	–	0.490925	0.916
12	alpha	ncc	inferior parietal R	ASD-Unlikely vs ASD-Probable	-0.31879	-1.16019	–	0.522609	0.881
12	alpha	ncc	inferior parietal R	ASD-Possible vs ASD-Probable	-0.0492675	-0.867303	–	0.768768	0.972
12	alpha	ncc	inferior temporal L	ASD-Unlikely vs ASD-Possible	-0.103273	-0.669595	–	0.463049	0.916
12	alpha	ncc	inferior temporal L	ASD-Unlikely vs ASD-Probable	-0.118846	-0.788494	–	0.550802	0.916
12	alpha	ncc	inferior temporal L	ASD-Possible vs ASD-Probable	-0.0155724	-0.674568	–	0.643424	0.99
12	alpha	ncc	inferior temporal R	ASD-Unlikely vs ASD-Possible	0.060686	-0.391095	–	0.512468	0.94
12	alpha	ncc	inferior temporal R	ASD-Unlikely vs ASD-Probable	-0.343981	-0.884784	–	0.196823	0.788
12	alpha	ncc	inferior temporal R	ASD-Possible vs ASD-Probable	-0.404667	-0.913971	–	0.104638	0.643
12	alpha	ncc	insula L	ASD-Unlikely vs ASD-Possible	0.0643871	-0.323255	–	0.45203	0.916
12	alpha	ncc	insula L	ASD-Unlikely vs ASD-Probable	-0.231047	-0.686384	–	0.22429	0.85
12	alpha	ncc	insula L	ASD-Possible vs ASD-Probable	-0.295434	-0.747211	–	0.156343	0.775
12	alpha	ncc	insula R	ASD-Unlikely vs ASD-Possible	0.253654	-0.102752	–	0.61006	0.769
12	alpha	ncc	insula R	ASD-Unlikely vs ASD-Probable	-0.0505362	-0.456791	–	0.355719	0.946
12	alpha	ncc	insula R	ASD-Possible vs ASD-Probable	-0.30419	-0.712904	–	0.104524	0.72
12	alpha	ncc	isthmus cingulate L	ASD-Unlikely vs ASD-Possible	0.124283	-0.341645	–	0.59021	0.916
12	alpha	ncc	isthmus cingulate L	ASD-Unlikely vs ASD-Probable	-0.0459106	-0.595253	–	0.503432	0.951
12	alpha	ncc	isthmus cingulate L	ASD-Possible vs ASD-Probable	-0.170193	-0.687617	–	0.347231	0.916
12	alpha	ncc	isthmus cingulate R	ASD-Unlikely vs ASD-Possible	-0.20963	-0.653583	–	0.234324	0.85
12	alpha	ncc	isthmus cingulate R	ASD-Unlikely vs ASD-Probable	-0.0908506	-0.615339	–	0.433638	0.916
12	alpha	ncc	isthmus cingulate R	ASD-Possible vs ASD-Probable	0.118779	-0.399713	–	0.637272	0.916
12	alpha	ncc	lateral occipital L	ASD-Unlikely vs ASD-Possible	0.102238	-0.704962	–	0.909439	0.946
12	alpha	ncc	lateral occipital L	ASD-Unlikely vs ASD-Probable	-0.412856	-1.38995	–	0.564241	0.85
12	alpha	ncc	lateral occipital L	ASD-Possible vs ASD-Probable	-0.515095	-1.39708	–	0.366892	0.811
12	alpha	ncc	lateral occipital R	ASD-Unlikely vs ASD-Possible	0.231454	-0.468772	–	0.931679	0.916
12	alpha	ncc	lateral occipital R	ASD-Unlikely vs ASD-Probable	-0.262728	-1.13974	–	0.614282	0.916
12	alpha	ncc	lateral occipital R	ASD-Possible vs ASD-Probable	-0.494182	-1.31448	–	0.326118	0.795
12	alpha	ncc	lateral orbitofrontal L	ASD-Unlikely vs ASD-Possible	-0.0431133	-0.420295	–	0.334068	0.946
12	alpha	ncc	lateral orbitofrontal L	ASD-Unlikely vs ASD-Probable	-0.236695	-0.670983	–	0.197593	0.85
12	alpha	ncc	lateral orbitofrontal L	ASD-Possible vs ASD-Probable	-0.193582	-0.631661	–	0.244498	0.85
12	alpha	ncc	lateral orbitofrontal R	ASD-Unlikely vs ASD-Possible	0.0747717	-0.276558	–	0.426101	0.916
12	alpha	ncc	lateral orbitofrontal R	ASD-Unlikely vs ASD-Probable	-0.381727	-0.78135	–	0.0178965	0.453
12	alpha	ncc	lateral orbitofrontal R	ASD-Possible vs ASD-Probable	-0.456498	-0.860478	–	-0.0525185	0.321
12	alpha	ncc	lingual L	ASD-Unlikely vs ASD-Possible	0.195703	-0.274312	–	0.665717	0.85
12	alpha	ncc	lingual L	ASD-Unlikely vs ASD-Probable	0.103701	-0.439138	–	0.646541	0.916
12	alpha	ncc	lingual L	ASD-Possible vs ASD-Probable	-0.0920011	-0.635868	–	0.451866	0.916
12	alpha	ncc	lingual R	ASD-Unlikely vs ASD-Possible	0.0596617	-0.436222	–	0.555546	0.946
12	alpha	ncc	lingual R	ASD-Unlikely vs ASD-Probable	-0.261435	-0.851773	–	0.328903	0.85
12	alpha	ncc	lingual R	ASD-Possible vs ASD-Probable	-0.321097	-0.885961	–	0.243767	0.832
12	alpha	ncc	medial orbitofrontal L	ASD-Unlikely vs ASD-Possible	0.00198796	-0.354481	–	0.358457	0.997
12	alpha	ncc	medial orbitofrontal L	ASD-Unlikely vs ASD-Probable	-0.392415	-0.802323	–	0.0174927	0.453
12	alpha	ncc	medial orbitofrontal L	ASD-Possible vs ASD-Probable	-0.394403	-0.798278	–	0.00947222	0.453
12	alpha	ncc	medial orbitofrontal R	ASD-Unlikely vs ASD-Possible	0.0956326	-0.28158	–	0.472845	0.916
12	alpha	ncc	medial orbitofrontal R	ASD-Unlikely vs ASD-Probable	-0.0988051	-0.515132	–	0.317522	0.916
12	alpha	ncc	medial orbitofrontal R	ASD-Possible vs ASD-Probable	-0.194438	-0.616504	–	0.227628	0.85
12	alpha	ncc	middle temporal L	ASD-Unlikely vs ASD-Possible	-0.0489541	-0.642228	–	0.54432	0.951
12	alpha	ncc	middle temporal L	ASD-Unlikely vs ASD-Probable	-0.19747	-0.889121	–	0.494181	0.916
12	alpha	ncc	middle temporal L	ASD-Possible vs ASD-Probable	-0.148516	-0.838524	–	0.541492	0.916
12	alpha	ncc	middle temporal R	ASD-Unlikely vs ASD-Possible	-0.010709	-0.493894	–	0.472476	0.99
12	alpha	ncc	middle temporal R	ASD-Unlikely vs ASD-Probable	-0.364842	-0.917492	–	0.187807	0.775
12	alpha	ncc	middle temporal R	ASD-Possible vs ASD-Probable	-0.354133	-0.898135	–	0.189868	0.775
12	alpha	ncc	paracentral L	ASD-Unlikely vs ASD-Possible	-0.167101	-0.498675	–	0.164473	0.85
12	alpha	ncc	paracentral L	ASD-Unlikely vs ASD-Probable	-0.41393	-0.801458	–	-0.0264031	0.37
12	alpha	ncc	paracentral L	ASD-Possible vs ASD-Probable	-0.246829	-0.628693	–	0.135035	0.775
12	alpha	ncc	paracentral R	ASD-Unlikely vs ASD-Possible	-0.1453	-0.485709	–	0.19511	0.85
12	alpha	ncc	paracentral R	ASD-Unlikely vs ASD-Probable	-0.165077	-0.566078	–	0.235924	0.85
12	alpha	ncc	paracentral R	ASD-Possible vs ASD-Probable	-0.0197771	-0.412683	–	0.373129	0.974
12	alpha	ncc	parahippocampal L	ASD-Unlikely vs ASD-Possible	0.109101	-0.325147	–	0.543349	0.916
12	alpha	ncc	parahippocampal L	ASD-Unlikely vs ASD-Probable	-0.0869393	-0.593462	–	0.419583	0.916
12	alpha	ncc	parahippocampal L	ASD-Possible vs ASD-Probable	-0.19604	-0.705235	–	0.313154	0.875
12	alpha	ncc	parahippocampal R	ASD-Unlikely vs ASD-Possible	-0.176604	-0.620684	–	0.267476	0.855
12	alpha	ncc	parahippocampal R	ASD-Unlikely vs ASD-Probable	-0.34034	-0.864715	–	0.184035	0.775
12	alpha	ncc	parahippocampal R	ASD-Possible vs ASD-Probable	-0.163736	-0.670431	–	0.342959	0.916
12	alpha	ncc	pars opercularis L	ASD-Unlikely vs ASD-Possible	-0.250969	-0.659862	–	0.157924	0.792
12	alpha	ncc	pars opercularis L	ASD-Unlikely vs ASD-Probable	-0.370421	-0.850277	–	0.109434	0.664
12	alpha	ncc	pars opercularis L	ASD-Possible vs ASD-Probable	-0.119452	-0.590726	–	0.351822	0.916
12	alpha	ncc	pars opercularis R	ASD-Unlikely vs ASD-Possible	-0.210318	-0.612844	–	0.192208	0.85
12	alpha	ncc	pars opercularis R	ASD-Unlikely vs ASD-Probable	-0.579154	-1.04711	–	-0.111201	0.273
12	alpha	ncc	pars opercularis R	ASD-Possible vs ASD-Probable	-0.368836	-0.809008	–	0.0713352	0.603
12	alpha	ncc	pars orbitalis L	ASD-Unlikely vs ASD-Possible	-0.531158	-1.04369	–	-0.0186232	0.41
12	alpha	ncc	pars orbitalis L	ASD-Unlikely vs ASD-Probable	-0.627036	-1.19644	–	-0.0576286	0.35
12	alpha	ncc	pars orbitalis L	ASD-Possible vs ASD-Probable	-0.0958777	-0.663592	–	0.471836	0.916
12	alpha	ncc	pars orbitalis R	ASD-Unlikely vs ASD-Possible	-0.110779	-0.508744	–	0.287186	0.916
12	alpha	ncc	pars orbitalis R	ASD-Unlikely vs ASD-Probable	-0.358868	-0.814775	–	0.0970398	0.643
12	alpha	ncc	pars orbitalis R	ASD-Possible vs ASD-Probable	-0.248089	-0.700432	–	0.204254	0.85
12	alpha	ncc	pars triangularis L	ASD-Unlikely vs ASD-Possible	-0.242698	-0.722172	–	0.236776	0.85
12	alpha	ncc	pars triangularis L	ASD-Unlikely vs ASD-Probable	-0.782419	-1.2951	–	-0.269735	0.102
12	alpha	ncc	pars triangularis L	ASD-Possible vs ASD-Probable	-0.539721	-1.08855	–	0.00911232	0.453
12	alpha	ncc	pars triangularis R	ASD-Unlikely vs ASD-Possible	-0.193801	-0.645545	–	0.257943	0.85
12	alpha	ncc	pars triangularis R	ASD-Unlikely vs ASD-Probable	-0.475291	-1.00521	–	0.054626	0.526
12	alpha	ncc	pars triangularis R	ASD-Possible vs ASD-Probable	-0.28149	-0.789092	–	0.226111	0.85
12	alpha	ncc	pericalcarine L	ASD-Unlikely vs ASD-Possible	0.0496463	-0.411842	–	0.511134	0.949
12	alpha	ncc	pericalcarine L	ASD-Unlikely vs ASD-Probable	-0.28172	-0.843308	–	0.279868	0.85
12	alpha	ncc	pericalcarine L	ASD-Possible vs ASD-Probable	-0.331366	-0.864359	–	0.201626	0.792
12	alpha	ncc	pericalcarine R	ASD-Unlikely vs ASD-Possible	0.130541	-0.345029	–	0.606111	0.916
12	alpha	ncc	pericalcarine R	ASD-Unlikely vs ASD-Probable	-0.0194086	-0.606191	–	0.567373	0.987
12	alpha	ncc	pericalcarine R	ASD-Possible vs ASD-Probable	-0.14995	-0.719343	–	0.419444	0.916
12	alpha	ncc	postcentral L	ASD-Unlikely vs ASD-Possible	-0.171668	-0.535266	–	0.19193	0.85
12	alpha	ncc	postcentral L	ASD-Unlikely vs ASD-Probable	-0.504773	-0.930412	–	-0.0791334	0.273
12	alpha	ncc	postcentral L	ASD-Possible vs ASD-Probable	-0.333105	-0.753088	–	0.0868782	0.643
12	alpha	ncc	postcentral R	ASD-Unlikely vs ASD-Possible	0.0367952	-0.332436	–	0.406026	0.951
12	alpha	ncc	postcentral R	ASD-Unlikely vs ASD-Probable	-0.189116	-0.618932	–	0.240699	0.85
12	alpha	ncc	postcentral R	ASD-Possible vs ASD-Probable	-0.225912	-0.647212	–	0.195389	0.85
12	alpha	ncc	posterior cingulate L	ASD-Unlikely vs ASD-Possible	-0.252084	-0.558875	–	0.0547057	0.625
12	alpha	ncc	posterior cingulate L	ASD-Unlikely vs ASD-Probable	-0.107497	-0.470015	–	0.255022	0.916
12	alpha	ncc	posterior cingulate L	ASD-Possible vs ASD-Probable	0.144588	-0.213606	–	0.502781	0.85
12	alpha	ncc	posterior cingulate R	ASD-Unlikely vs ASD-Possible	0.0135193	-0.309051	–	0.33609	0.978
12	alpha	ncc	posterior cingulate R	ASD-Unlikely vs ASD-Probable	-0.0210465	-0.406348	–	0.364255	0.972
12	alpha	ncc	posterior cingulate R	ASD-Possible vs ASD-Probable	-0.0345658	-0.413192	–	0.344061	0.951
12	alpha	ncc	precentral L	ASD-Unlikely vs ASD-Possible	-0.0594259	-0.435485	–	0.316633	0.919
12	alpha	ncc	precentral L	ASD-Unlikely vs ASD-Probable	-0.158887	-0.59564	–	0.277867	0.907
12	alpha	ncc	precentral L	ASD-Possible vs ASD-Probable	-0.0994607	-0.527326	–	0.328405	0.916
12	alpha	ncc	precentral R	ASD-Unlikely vs ASD-Possible	0.0619123	-0.284108	–	0.407933	0.916
12	alpha	ncc	precentral R	ASD-Unlikely vs ASD-Probable	-0.0974349	-0.501854	–	0.306984	0.916
12	alpha	ncc	precentral R	ASD-Possible vs ASD-Probable	-0.159347	-0.553812	–	0.235118	0.85
12	alpha	ncc	precuneus L	ASD-Unlikely vs ASD-Possible	-0.100516	-0.476937	–	0.275905	0.916
12	alpha	ncc	precuneus L	ASD-Unlikely vs ASD-Probable	-0.300738	-0.75051	–	0.149033	0.775
12	alpha	ncc	precuneus L	ASD-Possible vs ASD-Probable	-0.200222	-0.634236	–	0.233792	0.85
12	alpha	ncc	precuneus R	ASD-Unlikely vs ASD-Possible	0.116776	-0.316779	–	0.55033	0.916
12	alpha	ncc	precuneus R	ASD-Unlikely vs ASD-Probable	-0.672358	-1.20188	–	-0.142833	0.273
12	alpha	ncc	precuneus R	ASD-Possible vs ASD-Probable	-0.789134	-1.30283	–	-0.275435	0.102
12	alpha	ncc	rostral anterior cingulate L	ASD-Unlikely vs ASD-Possible	-0.0196384	-0.329157	–	0.28988	0.972
12	alpha	ncc	rostral anterior cingulate L	ASD-Unlikely vs ASD-Probable	-0.43976	-0.796046	–	-0.0834744	0.273
12	alpha	ncc	rostral anterior cingulate L	ASD-Possible vs ASD-Probable	-0.420122	-0.770772	–	-0.0694714	0.273
12	alpha	ncc	rostral anterior cingulate R	ASD-Unlikely vs ASD-Possible	0.0685557	-0.238992	–	0.376104	0.916
12	alpha	ncc	rostral anterior cingulate R	ASD-Unlikely vs ASD-Probable	-0.368342	-0.730523	–	-0.00616021	0.429
12	alpha	ncc	rostral anterior cingulate R	ASD-Possible vs ASD-Probable	-0.436897	-0.793038	–	-0.0807566	0.273
12	alpha	ncc	rostral middle frontal L	ASD-Unlikely vs ASD-Possible	-0.0916878	-0.569191	–	0.385815	0.916
12	alpha	ncc	rostral middle frontal L	ASD-Unlikely vs ASD-Probable	-0.248643	-0.785068	–	0.287783	0.85
12	alpha	ncc	rostral middle frontal L	ASD-Possible vs ASD-Probable	-0.156955	-0.697752	–	0.383842	0.916
12	alpha	ncc	rostral middle frontal R	ASD-Unlikely vs ASD-Possible	0.0809666	-0.407589	–	0.569523	0.916
12	alpha	ncc	rostral middle frontal R	ASD-Unlikely vs ASD-Probable	-0.255574	-0.786648	–	0.2755	0.85
12	alpha	ncc	rostral middle frontal R	ASD-Possible vs ASD-Probable	-0.33654	-0.849483	–	0.176402	0.775
12	alpha	ncc	superior frontal L	ASD-Unlikely vs ASD-Possible	-0.0896994	-0.479984	–	0.300586	0.916
12	alpha	ncc	superior frontal L	ASD-Unlikely vs ASD-Probable	-0.198016	-0.670814	–	0.274781	0.85
12	alpha	ncc	superior frontal L	ASD-Possible vs ASD-Probable	-0.108317	-0.554727	–	0.338093	0.916
12	alpha	ncc	superior frontal R	ASD-Unlikely vs ASD-Possible	0.0794389	-0.343701	–	0.502578	0.916
12	alpha	ncc	superior frontal R	ASD-Unlikely vs ASD-Probable	0.0770085	-0.396056	–	0.550073	0.916
12	alpha	ncc	superior frontal R	ASD-Possible vs ASD-Probable	-0.00243046	-0.461119	–	0.456258	0.997
12	alpha	ncc	superior parietal L	ASD-Unlikely vs ASD-Possible	0.0601866	-0.524337	–	0.64471	0.951
12	alpha	ncc	superior parietal L	ASD-Unlikely vs ASD-Probable	-0.42084	-1.12723	–	0.285545	0.799
12	alpha	ncc	superior parietal L	ASD-Possible vs ASD-Probable	-0.481027	-1.17887	–	0.216818	0.775
12	alpha	ncc	superior parietal R	ASD-Unlikely vs ASD-Possible	0.151236	-0.294547	–	0.597018	0.916
12	alpha	ncc	superior parietal R	ASD-Unlikely vs ASD-Probable	-0.663585	-1.18842	–	-0.138753	0.273
12	alpha	ncc	superior parietal R	ASD-Possible vs ASD-Probable	-0.814821	-1.3316	–	-0.298039	0.102
12	alpha	ncc	superior temporal L	ASD-Unlikely vs ASD-Possible	-0.0611412	-0.467853	–	0.345571	0.926
12	alpha	ncc	superior temporal L	ASD-Unlikely vs ASD-Probable	-0.0948465	-0.560859	–	0.371166	0.916
12	alpha	ncc	superior temporal L	ASD-Possible vs ASD-Probable	-0.0337053	-0.499029	–	0.431618	0.963
12	alpha	ncc	superior temporal R	ASD-Unlikely vs ASD-Possible	0.110906	-0.32168	–	0.543492	0.916
12	alpha	ncc	superior temporal R	ASD-Unlikely vs ASD-Probable	-0.290922	-0.791379	–	0.209534	0.811
12	alpha	ncc	superior temporal R	ASD-Possible vs ASD-Probable	-0.401828	-0.899404	–	0.0957472	0.643
12	alpha	ncc	supramarginal L	ASD-Unlikely vs ASD-Possible	-0.454466	-1.10728	–	0.198351	0.775
12	alpha	ncc	supramarginal L	ASD-Unlikely vs ASD-Probable	-0.312324	-1.05721	–	0.432559	0.85
12	alpha	ncc	supramarginal L	ASD-Possible vs ASD-Probable	0.142142	-0.609377	–	0.893661	0.916
12	alpha	ncc	supramarginal R	ASD-Unlikely vs ASD-Possible	-0.150758	-0.772761	–	0.471244	0.916
12	alpha	ncc	supramarginal R	ASD-Unlikely vs ASD-Probable	-0.831272	-1.59919	–	-0.0633546	0.364
12	alpha	ncc	supramarginal R	ASD-Possible vs ASD-Probable	-0.680514	-1.44226	–	0.0812329	0.526
12	alpha	ncc	temporal pole L	ASD-Unlikely vs ASD-Possible	-0.183452	-0.567834	–	0.20093	0.85
12	alpha	ncc	temporal pole L	ASD-Unlikely vs ASD-Probable	-0.512895	-0.965738	–	-0.0600529	0.321
12	alpha	ncc	temporal pole L	ASD-Possible vs ASD-Probable	-0.329444	-0.777676	–	0.118789	0.727
12	alpha	ncc	temporal pole R	ASD-Unlikely vs ASD-Possible	-0.00022275	-0.346681	–	0.346235	0.999
12	alpha	ncc	temporal pole R	ASD-Unlikely vs ASD-Probable	-0.353133	-0.762757	–	0.0564916	0.563
12	alpha	ncc	temporal pole R	ASD-Possible vs ASD-Probable	-0.35291	-0.75807	–	0.0522505	0.56
12	alpha	ncc	transverse temporal L	ASD-Unlikely vs ASD-Possible	0.0886312	-0.330509	–	0.507771	0.916
12	alpha	ncc	transverse temporal L	ASD-Unlikely vs ASD-Probable	0.0991628	-0.388305	–	0.58663	0.916
12	alpha	ncc	transverse temporal L	ASD-Possible vs ASD-Probable	0.0105316	-0.473542	–	0.494605	0.99
12	alpha	ncc	transverse temporal R	ASD-Unlikely vs ASD-Possible	0.231951	-0.244019	–	0.70792	0.85
12	alpha	ncc	transverse temporal R	ASD-Unlikely vs ASD-Probable	0.0799294	-0.459325	–	0.619184	0.926
12	alpha	ncc	transverse temporal R	ASD-Possible vs ASD-Probable	-0.152021	-0.692232	–	0.38819	0.916
12	alpha	npl	bankssts L	ASD-Unlikely vs ASD-Possible	-0.195811	-0.456298	–	0.0646755	0.563
12	alpha	npl	bankssts L	ASD-Unlikely vs ASD-Probable	-0.289031	-0.554871	–	-0.0231922	0.462
12	alpha	npl	bankssts L	ASD-Possible vs ASD-Probable	-0.0932203	-0.312501	–	0.12606	0.757
12	alpha	npl	bankssts R	ASD-Unlikely vs ASD-Possible	-0.151591	-0.406059	–	0.102877	0.597
12	alpha	npl	bankssts R	ASD-Unlikely vs ASD-Probable	-0.166262	-0.422916	–	0.0903924	0.594
12	alpha	npl	bankssts R	ASD-Possible vs ASD-Probable	-0.0146713	-0.233852	–	0.204509	0.964
12	alpha	npl	caudal anterior cingulate L	ASD-Unlikely vs ASD-Possible	-0.106543	-0.410628	–	0.197542	0.814
12	alpha	npl	caudal anterior cingulate L	ASD-Unlikely vs ASD-Probable	-0.165282	-0.47823	–	0.147666	0.674
12	alpha	npl	caudal anterior cingulate L	ASD-Possible vs ASD-Probable	-0.0587388	-0.314739	–	0.197261	0.845
12	alpha	npl	caudal anterior cingulate R	ASD-Unlikely vs ASD-Possible	-0.0640349	-0.300887	–	0.172817	0.833
12	alpha	npl	caudal anterior cingulate R	ASD-Unlikely vs ASD-Probable	-0.187159	-0.42948	–	0.0551606	0.563
12	alpha	npl	caudal anterior cingulate R	ASD-Possible vs ASD-Probable	-0.123125	-0.322794	–	0.0765454	0.594
12	alpha	npl	caudal middle frontal L	ASD-Unlikely vs ASD-Possible	-0.220762	-0.51184	–	0.0703168	0.563
12	alpha	npl	caudal middle frontal L	ASD-Unlikely vs ASD-Probable	-0.213012	-0.513667	–	0.087644	0.594
12	alpha	npl	caudal middle frontal L	ASD-Possible vs ASD-Probable	0.00775017	-0.234825	–	0.250325	0.989
12	alpha	npl	caudal middle frontal R	ASD-Unlikely vs ASD-Possible	-0.282345	-0.591792	–	0.0271029	0.496
12	alpha	npl	caudal middle frontal R	ASD-Unlikely vs ASD-Probable	-0.483423	-0.797934	–	-0.168912	0.111
12	alpha	npl	caudal middle frontal R	ASD-Possible vs ASD-Probable	-0.201078	-0.460464	–	0.0583074	0.563
12	alpha	npl	cuneus L	ASD-Unlikely vs ASD-Possible	0.0581925	-0.146232	–	0.262616	0.817
12	alpha	npl	cuneus L	ASD-Unlikely vs ASD-Probable	-0.139952	-0.349212	–	0.0693072	0.594
12	alpha	npl	cuneus L	ASD-Possible vs ASD-Probable	-0.198145	-0.37388	–	-0.0224096	0.453
12	alpha	npl	cuneus R	ASD-Unlikely vs ASD-Possible	-0.00259972	-0.301558	–	0.296359	0.99
12	alpha	npl	cuneus R	ASD-Unlikely vs ASD-Probable	-0.0650104	-0.370726	–	0.240706	0.845
12	alpha	npl	cuneus R	ASD-Possible vs ASD-Probable	-0.0624107	-0.315402	–	0.19058	0.844
12	alpha	npl	entorhinal L	ASD-Unlikely vs ASD-Possible	-0.0729151	-0.169071	–	0.0232404	0.563
12	alpha	npl	entorhinal L	ASD-Unlikely vs ASD-Probable	-0.0540561	-0.154333	–	0.0462209	0.674
12	alpha	npl	entorhinal L	ASD-Possible vs ASD-Probable	0.018859	-0.0650305	–	0.102749	0.845
12	alpha	npl	entorhinal R	ASD-Unlikely vs ASD-Possible	-0.121145	-0.267287	–	0.0249971	0.545
12	alpha	npl	entorhinal R	ASD-Unlikely vs ASD-Probable	-0.0502865	-0.202425	–	0.101852	0.814
12	alpha	npl	entorhinal R	ASD-Possible vs ASD-Probable	0.0708586	-0.0560107	–	0.197728	0.642
12	alpha	npl	frontal pole L	ASD-Unlikely vs ASD-Possible	-0.114912	-0.292293	–	0.0624686	0.594
12	alpha	npl	frontal pole L	ASD-Unlikely vs ASD-Probable	-0.0708611	-0.253615	–	0.111892	0.798
12	alpha	npl	frontal pole L	ASD-Possible vs ASD-Probable	0.0440508	-0.108263	–	0.196365	0.817
12	alpha	npl	frontal pole R	ASD-Unlikely vs ASD-Possible	-0.107102	-0.281924	–	0.0677203	0.594
12	alpha	npl	frontal pole R	ASD-Unlikely vs ASD-Probable	-0.0575987	-0.239165	–	0.123968	0.814
12	alpha	npl	frontal pole R	ASD-Possible vs ASD-Probable	0.0495031	-0.103581	–	0.202587	0.814
12	alpha	npl	fusiform L	ASD-Unlikely vs ASD-Possible	0.0016892	-0.14623	–	0.149608	0.99
12	alpha	npl	fusiform L	ASD-Unlikely vs ASD-Probable	-0.140604	-0.294431	–	0.0132238	0.496
12	alpha	npl	fusiform L	ASD-Possible vs ASD-Probable	-0.142293	-0.269889	–	-0.0146965	0.453
12	alpha	npl	fusiform R	ASD-Unlikely vs ASD-Possible	-0.0224334	-0.202583	–	0.157717	0.926
12	alpha	npl	fusiform R	ASD-Unlikely vs ASD-Probable	-0.0428512	-0.229514	–	0.143812	0.845
12	alpha	npl	fusiform R	ASD-Possible vs ASD-Probable	-0.0204178	-0.17475	–	0.133914	0.926
12	alpha	npl	inferior parietal L	ASD-Unlikely vs ASD-Possible	-0.0249527	-0.322292	–	0.272387	0.955
12	alpha	npl	inferior parietal L	ASD-Unlikely vs ASD-Probable	-0.202386	-0.509397	–	0.104625	0.594
12	alpha	npl	inferior parietal L	ASD-Possible vs ASD-Probable	-0.177433	-0.425886	–	0.0710195	0.594
12	alpha	npl	inferior parietal R	ASD-Unlikely vs ASD-Possible	-0.167398	-0.605125	–	0.27033	0.798
12	alpha	npl	inferior parietal R	ASD-Unlikely vs ASD-Probable	-0.226713	-0.672198	–	0.218771	0.681
12	alpha	npl	inferior parietal R	ASD-Possible vs ASD-Probable	-0.0593159	-0.42432	–	0.305689	0.89
12	alpha	npl	inferior temporal L	ASD-Unlikely vs ASD-Possible	-0.0960882	-0.298155	–	0.105978	0.712
12	alpha	npl	inferior temporal L	ASD-Unlikely vs ASD-Probable	-0.137021	-0.346649	–	0.072608	0.594
12	alpha	npl	inferior temporal L	ASD-Possible vs ASD-Probable	-0.0409324	-0.213261	–	0.131396	0.845
12	alpha	npl	inferior temporal R	ASD-Unlikely vs ASD-Possible	-0.178512	-0.343501	–	-0.0135232	0.462
12	alpha	npl	inferior temporal R	ASD-Unlikely vs ASD-Probable	-0.107003	-0.27694	–	0.0629342	0.594
12	alpha	npl	inferior temporal R	ASD-Possible vs ASD-Probable	0.0715096	-0.0714622	–	0.214481	0.681
12	alpha	npl	insula L	ASD-Unlikely vs ASD-Possible	-0.0431702	-0.196891	–	0.110551	0.819
12	alpha	npl	insula L	ASD-Unlikely vs ASD-Probable	-0.152483	-0.313993	–	0.00902664	0.496
12	alpha	npl	insula L	ASD-Possible vs ASD-Probable	-0.109313	-0.242215	–	0.0235888	0.545
12	alpha	npl	insula R	ASD-Unlikely vs ASD-Possible	-0.0515843	-0.219637	–	0.116468	0.814
12	alpha	npl	insula R	ASD-Unlikely vs ASD-Probable	-0.00302908	-0.181125	–	0.175066	0.99
12	alpha	npl	insula R	ASD-Possible vs ASD-Probable	0.0485553	-0.0978823	–	0.194993	0.814
12	alpha	npl	isthmus cingulate L	ASD-Unlikely vs ASD-Possible	0.0303821	-0.0754297	–	0.136194	0.817
12	alpha	npl	isthmus cingulate L	ASD-Unlikely vs ASD-Probable	-0.113521	-0.223584	–	-0.00345754	0.462
12	alpha	npl	isthmus cingulate L	ASD-Possible vs ASD-Probable	-0.143903	-0.236355	–	-0.0514509	0.111
12	alpha	npl	isthmus cingulate R	ASD-Unlikely vs ASD-Possible	0.0166876	-0.116192	–	0.149567	0.926
12	alpha	npl	isthmus cingulate R	ASD-Unlikely vs ASD-Probable	-0.0343519	-0.171925	–	0.103222	0.844
12	alpha	npl	isthmus cingulate R	ASD-Possible vs ASD-Probable	-0.0510395	-0.166302	–	0.0642226	0.744
12	alpha	npl	lateral occipital L	ASD-Unlikely vs ASD-Possible	-0.174055	-0.360852	–	0.0127419	0.496
12	alpha	npl	lateral occipital L	ASD-Unlikely vs ASD-Probable	-0.283008	-0.470674	–	-0.0953433	0.111
12	alpha	npl	lateral occipital L	ASD-Possible vs ASD-Probable	-0.108953	-0.271824	–	0.0539183	0.594
12	alpha	npl	lateral occipital R	ASD-Unlikely vs ASD-Possible	-0.0401109	-0.377296	–	0.297074	0.926
12	alpha	npl	lateral occipital R	ASD-Unlikely vs ASD-Probable	-0.0992518	-0.434992	–	0.236488	0.814
12	alpha	npl	lateral occipital R	ASD-Possible vs ASD-Probable	-0.0591408	-0.348291	–	0.230009	0.845
12	alpha	npl	lateral orbitofrontal L	ASD-Unlikely vs ASD-Possible	-0.0222427	-0.13816	–	0.0936741	0.858
12	alpha	npl	lateral orbitofrontal L	ASD-Unlikely vs ASD-Probable	-0.124109	-0.245125	–	-0.00309355	0.462
12	alpha	npl	lateral orbitofrontal L	ASD-Possible vs ASD-Probable	-0.101866	-0.203179	–	-0.000554315	0.474
12	alpha	npl	lateral orbitofrontal R	ASD-Unlikely vs ASD-Possible	-0.0400822	-0.227139	–	0.146975	0.845
12	alpha	npl	lateral orbitofrontal R	ASD-Unlikely vs ASD-Probable	-0.0236331	-0.223458	–	0.176192	0.926
12	alpha	npl	lateral orbitofrontal R	ASD-Possible vs ASD-Probable	0.016449	-0.148567	–	0.181465	0.947
12	alpha	npl	lingual L	ASD-Unlikely vs ASD-Possible	-0.0153951	-0.151157	–	0.120367	0.929
12	alpha	npl	lingual L	ASD-Unlikely vs ASD-Probable	-0.12387	-0.263384	–	0.0156446	0.496
12	alpha	npl	lingual L	ASD-Possible vs ASD-Probable	-0.108474	-0.226893	–	0.00994435	0.496
12	alpha	npl	lingual R	ASD-Unlikely vs ASD-Possible	-0.0828186	-0.268312	–	0.102675	0.744
12	alpha	npl	lingual R	ASD-Unlikely vs ASD-Probable	-0.249854	-0.439379	–	-0.0603284	0.249
12	alpha	npl	lingual R	ASD-Possible vs ASD-Probable	-0.167035	-0.326918	–	-0.00715282	0.462
12	alpha	npl	medial orbitofrontal L	ASD-Unlikely vs ASD-Possible	-0.00212838	-0.128562	–	0.124305	0.99
12	alpha	npl	medial orbitofrontal L	ASD-Unlikely vs ASD-Probable	-0.00284716	-0.13498	–	0.129286	0.99
12	alpha	npl	medial orbitofrontal L	ASD-Possible vs ASD-Probable	-0.000718777	-0.11002	–	0.108583	0.99
12	alpha	npl	medial orbitofrontal R	ASD-Unlikely vs ASD-Possible	-0.0862945	-0.253937	–	0.0813485	0.681
12	alpha	npl	medial orbitofrontal R	ASD-Unlikely vs ASD-Probable	0.0584836	-0.120966	–	0.237934	0.814
12	alpha	npl	medial orbitofrontal R	ASD-Possible vs ASD-Probable	0.144778	-0.00345215	–	0.293008	0.496
12	alpha	npl	middle temporal L	ASD-Unlikely vs ASD-Possible	-0.137847	-0.361738	–	0.0860442	0.594
12	alpha	npl	middle temporal L	ASD-Unlikely vs ASD-Probable	-0.153905	-0.386304	–	0.0784936	0.594
12	alpha	npl	middle temporal L	ASD-Possible vs ASD-Probable	-0.0160586	-0.204724	–	0.172607	0.955
12	alpha	npl	middle temporal R	ASD-Unlikely vs ASD-Possible	-0.11509	-0.295147	–	0.0649668	0.594
12	alpha	npl	middle temporal R	ASD-Unlikely vs ASD-Probable	-0.124504	-0.309598	–	0.0605907	0.594
12	alpha	npl	middle temporal R	ASD-Possible vs ASD-Probable	-0.00941369	-0.162421	–	0.143594	0.965
12	alpha	npl	paracentral L	ASD-Unlikely vs ASD-Possible	-0.133445	-0.506487	–	0.239596	0.814
12	alpha	npl	paracentral L	ASD-Unlikely vs ASD-Probable	-0.29033	-0.675316	–	0.0946556	0.563
12	alpha	npl	paracentral L	ASD-Possible vs ASD-Probable	-0.156885	-0.46777	–	0.154	0.681
12	alpha	npl	paracentral R	ASD-Unlikely vs ASD-Possible	-0.244399	-0.634313	–	0.145514	0.594
12	alpha	npl	paracentral R	ASD-Unlikely vs ASD-Probable	-0.376726	-0.771763	–	0.0183098	0.496
12	alpha	npl	paracentral R	ASD-Possible vs ASD-Probable	-0.132327	-0.458761	–	0.194107	0.788
12	alpha	npl	parahippocampal L	ASD-Unlikely vs ASD-Possible	-0.0186398	-0.170257	–	0.132978	0.926
12	alpha	npl	parahippocampal L	ASD-Unlikely vs ASD-Probable	-0.0530311	-0.210581	–	0.104518	0.814
12	alpha	npl	parahippocampal L	ASD-Possible vs ASD-Probable	-0.0343913	-0.16598	–	0.0971973	0.844
12	alpha	npl	parahippocampal R	ASD-Unlikely vs ASD-Possible	0.0871805	-0.132307	–	0.306668	0.795
12	alpha	npl	parahippocampal R	ASD-Unlikely vs ASD-Probable	0.0473222	-0.174865	–	0.269509	0.845
12	alpha	npl	parahippocampal R	ASD-Possible vs ASD-Probable	-0.0398583	-0.224637	–	0.14492	0.845
12	alpha	npl	pars opercularis L	ASD-Unlikely vs ASD-Possible	0.0409721	-0.180427	–	0.262371	0.86
12	alpha	npl	pars opercularis L	ASD-Unlikely vs ASD-Probable	-0.0966364	-0.323166	–	0.129893	0.757
12	alpha	npl	pars opercularis L	ASD-Possible vs ASD-Probable	-0.137609	-0.325898	–	0.0506809	0.594
12	alpha	npl	pars opercularis R	ASD-Unlikely vs ASD-Possible	-0.180444	-0.383789	–	0.0229009	0.496
12	alpha	npl	pars opercularis R	ASD-Unlikely vs ASD-Probable	-0.21576	-0.425017	–	-0.00650296	0.462
12	alpha	npl	pars opercularis R	ASD-Possible vs ASD-Probable	-0.0353156	-0.209801	–	0.13917	0.845
12	alpha	npl	pars orbitalis L	ASD-Unlikely vs ASD-Possible	-0.0376954	-0.223045	–	0.147654	0.845
12	alpha	npl	pars orbitalis L	ASD-Unlikely vs ASD-Probable	0.0105304	-0.181283	–	0.202344	0.966
12	alpha	npl	pars orbitalis L	ASD-Possible vs ASD-Probable	0.0482258	-0.11049	–	0.206942	0.814
12	alpha	npl	pars orbitalis R	ASD-Unlikely vs ASD-Possible	-0.108225	-0.249226	–	0.0327764	0.563
12	alpha	npl	pars orbitalis R	ASD-Unlikely vs ASD-Probable	-0.170711	-0.3173	–	-0.0241227	0.453
12	alpha	npl	pars orbitalis R	ASD-Possible vs ASD-Probable	-0.0624866	-0.184957	–	0.0599839	0.681
12	alpha	npl	pars triangularis L	ASD-Unlikely vs ASD-Possible	-0.0590167	-0.230809	–	0.112776	0.814
12	alpha	npl	pars triangularis L	ASD-Unlikely vs ASD-Probable	-0.0687981	-0.244223	–	0.106626	0.798
12	alpha	npl	pars triangularis L	ASD-Possible vs ASD-Probable	-0.00978137	-0.15892	–	0.139357	0.964
12	alpha	npl	pars triangularis R	ASD-Unlikely vs ASD-Possible	-0.21004	-0.350173	–	-0.0699072	0.111
12	alpha	npl	pars triangularis R	ASD-Unlikely vs ASD-Probable	-0.27545	-0.419991	–	-0.13091	0.038*
12	alpha	npl	pars triangularis R	ASD-Possible vs ASD-Probable	-0.0654106	-0.187719	–	0.0568976	0.674
12	alpha	npl	pericalcarine L	ASD-Unlikely vs ASD-Possible	0.104299	-0.0932322	–	0.301831	0.674
12	alpha	npl	pericalcarine L	ASD-Unlikely vs ASD-Probable	0.0315268	-0.168572	–	0.231625	0.893
12	alpha	npl	pericalcarine L	ASD-Possible vs ASD-Probable	-0.0727726	-0.241864	–	0.0963192	0.757
12	alpha	npl	pericalcarine R	ASD-Unlikely vs ASD-Possible	-0.0811093	-0.343506	–	0.181288	0.814
12	alpha	npl	pericalcarine R	ASD-Unlikely vs ASD-Probable	-0.226388	-0.496073	–	0.043297	0.536
12	alpha	npl	pericalcarine R	ASD-Possible vs ASD-Probable	-0.145279	-0.366359	–	0.0758021	0.594
12	alpha	npl	postcentral L	ASD-Unlikely vs ASD-Possible	-0.0518559	-0.337962	–	0.23425	0.862
12	alpha	npl	postcentral L	ASD-Unlikely vs ASD-Probable	-0.194202	-0.478902	–	0.0904978	0.594
12	alpha	npl	postcentral L	ASD-Possible vs ASD-Probable	-0.142346	-0.3842	–	0.0995073	0.597
12	alpha	npl	postcentral R	ASD-Unlikely vs ASD-Possible	-0.0754206	-0.329148	–	0.178307	0.814
12	alpha	npl	postcentral R	ASD-Unlikely vs ASD-Probable	-0.145024	-0.403274	–	0.113227	0.642
12	alpha	npl	postcentral R	ASD-Possible vs ASD-Probable	-0.0696032	-0.286534	–	0.147328	0.814
12	alpha	npl	posterior cingulate L	ASD-Unlikely vs ASD-Possible	-0.156681	-0.506028	–	0.192666	0.744
12	alpha	npl	posterior cingulate L	ASD-Unlikely vs ASD-Probable	-0.345445	-0.710971	–	0.0200808	0.496
12	alpha	npl	posterior cingulate L	ASD-Possible vs ASD-Probable	-0.188764	-0.487469	–	0.109941	0.594
12	alpha	npl	posterior cingulate R	ASD-Unlikely vs ASD-Possible	-0.105961	-0.39257	–	0.180648	0.814
12	alpha	npl	posterior cingulate R	ASD-Unlikely vs ASD-Probable	-0.252364	-0.549539	–	0.0448112	0.529
12	alpha	npl	posterior cingulate R	ASD-Possible vs ASD-Probable	-0.146403	-0.393624	–	0.100817	0.597
12	alpha	npl	precentral L	ASD-Unlikely vs ASD-Possible	-0.105788	-0.380719	–	0.169143	0.798
12	alpha	npl	precentral L	ASD-Unlikely vs ASD-Probable	-0.224441	-0.50316	–	0.0542778	0.556
12	alpha	npl	precentral L	ASD-Possible vs ASD-Probable	-0.118653	-0.353499	–	0.116194	0.681
12	alpha	npl	precentral R	ASD-Unlikely vs ASD-Possible	-0.181539	-0.474197	–	0.111119	0.594
12	alpha	npl	precentral R	ASD-Unlikely vs ASD-Probable	-0.327891	-0.620549	–	-0.0352336	0.453
12	alpha	npl	precentral R	ASD-Possible vs ASD-Probable	-0.146352	-0.393429	–	0.100724	0.597
12	alpha	npl	precuneus L	ASD-Unlikely vs ASD-Possible	-0.0141367	-0.294816	–	0.266543	0.969
12	alpha	npl	precuneus L	ASD-Unlikely vs ASD-Probable	-0.0734656	-0.359777	–	0.212845	0.844
12	alpha	npl	precuneus L	ASD-Possible vs ASD-Probable	-0.0593289	-0.296761	–	0.178103	0.844
12	alpha	npl	precuneus R	ASD-Unlikely vs ASD-Possible	-0.0681676	-0.435714	–	0.299379	0.86
12	alpha	npl	precuneus R	ASD-Unlikely vs ASD-Probable	-0.176749	-0.549489	–	0.19599	0.712
12	alpha	npl	precuneus R	ASD-Possible vs ASD-Probable	-0.108582	-0.417133	–	0.19997	0.814
12	alpha	npl	rostral anterior cingulate L	ASD-Unlikely vs ASD-Possible	0.00679294	-0.142233	–	0.155819	0.972
12	alpha	npl	rostral anterior cingulate L	ASD-Unlikely vs ASD-Probable	-0.00204768	-0.157	–	0.152905	0.99
12	alpha	npl	rostral anterior cingulate L	ASD-Possible vs ASD-Probable	-0.00884062	-0.139429	–	0.121747	0.964
12	alpha	npl	rostral anterior cingulate R	ASD-Unlikely vs ASD-Possible	0.010346	-0.111618	–	0.13231	0.955
12	alpha	npl	rostral anterior cingulate R	ASD-Unlikely vs ASD-Probable	0.0422343	-0.0842982	–	0.168767	0.814
12	alpha	npl	rostral anterior cingulate R	ASD-Possible vs ASD-Probable	0.0318883	-0.0758871	–	0.139664	0.814
12	alpha	npl	rostral middle frontal L	ASD-Unlikely vs ASD-Possible	-0.152039	-0.39584	–	0.0917621	0.594
12	alpha	npl	rostral middle frontal L	ASD-Unlikely vs ASD-Probable	-0.301091	-0.549124	–	-0.0530591	0.393
12	alpha	npl	rostral middle frontal L	ASD-Possible vs ASD-Probable	-0.149052	-0.356531	–	0.0584259	0.594
12	alpha	npl	rostral middle frontal R	ASD-Unlikely vs ASD-Possible	-0.185935	-0.404016	–	0.0321459	0.529
12	alpha	npl	rostral middle frontal R	ASD-Unlikely vs ASD-Probable	-0.198167	-0.421949	–	0.0256163	0.496
12	alpha	npl	rostral middle frontal R	ASD-Possible vs ASD-Probable	-0.0122315	-0.198096	–	0.173633	0.964
12	alpha	npl	superior frontal L	ASD-Unlikely vs ASD-Possible	-0.0847063	-0.349268	–	0.179855	0.814
12	alpha	npl	superior frontal L	ASD-Unlikely vs ASD-Probable	-0.256122	-0.528255	–	0.0160118	0.496
12	alpha	npl	superior frontal L	ASD-Possible vs ASD-Probable	-0.171416	-0.393734	–	0.0509028	0.563
12	alpha	npl	superior frontal R	ASD-Unlikely vs ASD-Possible	-0.0191386	-0.344021	–	0.305744	0.965
12	alpha	npl	superior frontal R	ASD-Unlikely vs ASD-Probable	-0.235182	-0.562752	–	0.0923882	0.594
12	alpha	npl	superior frontal R	ASD-Possible vs ASD-Probable	-0.216043	-0.492756	–	0.0606695	0.563
12	alpha	npl	superior parietal L	ASD-Unlikely vs ASD-Possible	0.075692	-0.266422	–	0.417805	0.845
12	alpha	npl	superior parietal L	ASD-Unlikely vs ASD-Probable	-0.22078	-0.56966	–	0.128101	0.594
12	alpha	npl	superior parietal L	ASD-Possible vs ASD-Probable	-0.296472	-0.586741	–	-0.00620246	0.462
12	alpha	npl	superior parietal R	ASD-Unlikely vs ASD-Possible	-0.124522	-0.466673	–	0.217629	0.814
12	alpha	npl	superior parietal R	ASD-Unlikely vs ASD-Probable	-0.160369	-0.507617	–	0.186878	0.731
12	alpha	npl	superior parietal R	ASD-Possible vs ASD-Probable	-0.0358475	-0.326192	–	0.254497	0.926
12	alpha	npl	superior temporal L	ASD-Unlikely vs ASD-Possible	-0.0967512	-0.251822	–	0.0583197	0.594
12	alpha	npl	superior temporal L	ASD-Unlikely vs ASD-Probable	-0.137324	-0.295662	–	0.0210133	0.52
12	alpha	npl	superior temporal L	ASD-Possible vs ASD-Probable	-0.040573	-0.172711	–	0.0915655	0.814
12	alpha	npl	superior temporal R	ASD-Unlikely vs ASD-Possible	-0.0772014	-0.311214	–	0.156811	0.814
12	alpha	npl	superior temporal R	ASD-Unlikely vs ASD-Probable	-0.118258	-0.353661	–	0.117145	0.681
12	alpha	npl	superior temporal R	ASD-Possible vs ASD-Probable	-0.0410564	-0.240263	–	0.15815	0.845
12	alpha	npl	supramarginal L	ASD-Unlikely vs ASD-Possible	-0.0759759	-0.416255	–	0.264303	0.845
12	alpha	npl	supramarginal L	ASD-Unlikely vs ASD-Probable	-0.306625	-0.645233	–	0.0319841	0.496
12	alpha	npl	supramarginal L	ASD-Possible vs ASD-Probable	-0.230649	-0.514822	–	0.0535253	0.556
12	alpha	npl	supramarginal R	ASD-Unlikely vs ASD-Possible	-0.163343	-0.533166	–	0.206481	0.744
12	alpha	npl	supramarginal R	ASD-Unlikely vs ASD-Probable	-0.241207	-0.610629	–	0.128214	0.594
12	alpha	npl	supramarginal R	ASD-Possible vs ASD-Probable	-0.0778643	-0.390336	–	0.234607	0.844
12	alpha	npl	temporal pole L	ASD-Unlikely vs ASD-Possible	-0.206329	-0.346132	–	-0.0665268	0.111
12	alpha	npl	temporal pole L	ASD-Unlikely vs ASD-Probable	-0.244471	-0.388147	–	-0.100794	0.087
12	alpha	npl	temporal pole L	ASD-Possible vs ASD-Probable	-0.0381417	-0.160397	–	0.0841134	0.814
12	alpha	npl	temporal pole R	ASD-Unlikely vs ASD-Possible	-0.106787	-0.261566	–	0.0479912	0.594
12	alpha	npl	temporal pole R	ASD-Unlikely vs ASD-Probable	-0.0770484	-0.237345	–	0.0832483	0.712
12	alpha	npl	temporal pole R	ASD-Possible vs ASD-Probable	0.0297389	-0.103691	–	0.163169	0.845
12	alpha	npl	transverse temporal L	ASD-Unlikely vs ASD-Possible	-0.136881	-0.363971	–	0.0902096	0.597
12	alpha	npl	transverse temporal L	ASD-Unlikely vs ASD-Probable	-0.13986	-0.37036	–	0.0906393	0.597
12	alpha	npl	transverse temporal L	ASD-Possible vs ASD-Probable	-0.00297927	-0.194224	–	0.188266	0.99
12	alpha	npl	transverse temporal R	ASD-Unlikely vs ASD-Possible	-0.10656	-0.417671	–	0.20455	0.814
12	alpha	npl	transverse temporal R	ASD-Unlikely vs ASD-Probable	-0.128171	-0.445532	–	0.189189	0.788
12	alpha	npl	transverse temporal R	ASD-Possible vs ASD-Probable	-0.0216112	-0.281019	–	0.237796	0.955
12	beta	ncc	bankssts L	ASD-Unlikely vs ASD-Possible	-0.426141	-1.17434	–	0.322057	0.634
12	beta	ncc	bankssts L	ASD-Unlikely vs ASD-Probable	-0.123617	-0.947447	–	0.700212	0.95
12	beta	ncc	bankssts L	ASD-Possible vs ASD-Probable	0.302524	-0.528524	–	1.13357	0.795
12	beta	ncc	bankssts R	ASD-Unlikely vs ASD-Possible	-0.124753	-0.765449	–	0.515943	0.936
12	beta	ncc	bankssts R	ASD-Unlikely vs ASD-Probable	-0.128601	-0.88411	–	0.626908	0.95
12	beta	ncc	bankssts R	ASD-Possible vs ASD-Probable	-0.00384819	-0.722651	–	0.714955	0.992
12	beta	ncc	caudal anterior cingulate L	ASD-Unlikely vs ASD-Possible	-0.0611092	-0.555539	–	0.43332	0.95
12	beta	ncc	caudal anterior cingulate L	ASD-Unlikely vs ASD-Probable	-0.376844	-0.925777	–	0.172089	0.545
12	beta	ncc	caudal anterior cingulate L	ASD-Possible vs ASD-Probable	-0.315735	-0.855076	–	0.223607	0.625
12	beta	ncc	caudal anterior cingulate R	ASD-Unlikely vs ASD-Possible	-0.113511	-0.61502	–	0.387997	0.892
12	beta	ncc	caudal anterior cingulate R	ASD-Unlikely vs ASD-Probable	-0.443311	-1.02463	–	0.138005	0.545
12	beta	ncc	caudal anterior cingulate R	ASD-Possible vs ASD-Probable	-0.3298	-0.901194	–	0.241595	0.626
12	beta	ncc	caudal middle frontal L	ASD-Unlikely vs ASD-Possible	-0.397168	-1.09952	–	0.305182	0.635
12	beta	ncc	caudal middle frontal L	ASD-Unlikely vs ASD-Probable	-0.504052	-1.32704	–	0.318934	0.606
12	beta	ncc	caudal middle frontal L	ASD-Possible vs ASD-Probable	-0.106884	-0.888134	–	0.674365	0.95
12	beta	ncc	caudal middle frontal R	ASD-Unlikely vs ASD-Possible	0.212152	-0.478682	–	0.902986	0.839
12	beta	ncc	caudal middle frontal R	ASD-Unlikely vs ASD-Probable	-0.273767	-1.10299	–	0.555454	0.825
12	beta	ncc	caudal middle frontal R	ASD-Possible vs ASD-Probable	-0.485919	-1.19466	–	0.222823	0.545
12	beta	ncc	cuneus L	ASD-Unlikely vs ASD-Possible	-0.0636462	-0.576536	–	0.449244	0.95
12	beta	ncc	cuneus L	ASD-Unlikely vs ASD-Probable	-0.131421	-0.751924	–	0.489082	0.91
12	beta	ncc	cuneus L	ASD-Possible vs ASD-Probable	-0.0677749	-0.677349	–	0.541799	0.95
12	beta	ncc	cuneus R	ASD-Unlikely vs ASD-Possible	-0.0297703	-0.577093	–	0.517553	0.962
12	beta	ncc	cuneus R	ASD-Unlikely vs ASD-Probable	-0.79153	-1.45167	–	-0.131391	0.239
12	beta	ncc	cuneus R	ASD-Possible vs ASD-Probable	-0.76176	-1.39181	–	-0.131705	0.239
12	beta	ncc	entorhinal L	ASD-Unlikely vs ASD-Possible	0.0514363	-0.252689	–	0.355562	0.95
12	beta	ncc	entorhinal L	ASD-Unlikely vs ASD-Probable	0.0390533	-0.322059	–	0.400165	0.95
12	beta	ncc	entorhinal L	ASD-Possible vs ASD-Probable	-0.012383	-0.364264	–	0.339498	0.98
12	beta	ncc	entorhinal R	ASD-Unlikely vs ASD-Possible	0.160042	-0.204928	–	0.525013	0.744
12	beta	ncc	entorhinal R	ASD-Unlikely vs ASD-Probable	-0.126505	-0.556205	–	0.303196	0.855
12	beta	ncc	entorhinal R	ASD-Possible vs ASD-Probable	-0.286547	-0.693464	–	0.12037	0.545
12	beta	ncc	frontal pole L	ASD-Unlikely vs ASD-Possible	-0.203408	-0.686807	–	0.279992	0.753
12	beta	ncc	frontal pole L	ASD-Unlikely vs ASD-Probable	-0.447874	-1.0335	–	0.137754	0.545
12	beta	ncc	frontal pole L	ASD-Possible vs ASD-Probable	-0.244466	-0.81788	–	0.328949	0.748
12	beta	ncc	frontal pole R	ASD-Unlikely vs ASD-Possible	-0.108497	-0.575922	–	0.358928	0.889
12	beta	ncc	frontal pole R	ASD-Unlikely vs ASD-Probable	-0.645236	-1.19378	–	-0.0966896	0.24
12	beta	ncc	frontal pole R	ASD-Possible vs ASD-Probable	-0.536739	-1.05624	–	-0.0172343	0.324
12	beta	ncc	fusiform L	ASD-Unlikely vs ASD-Possible	0.229321	-0.147088	–	0.60573	0.606
12	beta	ncc	fusiform L	ASD-Unlikely vs ASD-Probable	0.0783632	-0.360287	–	0.517013	0.944
12	beta	ncc	fusiform L	ASD-Possible vs ASD-Probable	-0.150957	-0.581087	–	0.279172	0.802
12	beta	ncc	fusiform R	ASD-Unlikely vs ASD-Possible	0.198613	-0.177813	–	0.57504	0.675
12	beta	ncc	fusiform R	ASD-Unlikely vs ASD-Probable	0.146479	-0.302349	–	0.595308	0.826
12	beta	ncc	fusiform R	ASD-Possible vs ASD-Probable	-0.052134	-0.491112	–	0.386844	0.95
12	beta	ncc	inferior parietal L	ASD-Unlikely vs ASD-Possible	0.0955477	-0.564592	–	0.755688	0.95
12	beta	ncc	inferior parietal L	ASD-Unlikely vs ASD-Probable	0.0814965	-0.678401	–	0.841394	0.95
12	beta	ncc	inferior parietal L	ASD-Possible vs ASD-Probable	-0.0140511	-0.791624	–	0.763522	0.992
12	beta	ncc	inferior parietal R	ASD-Unlikely vs ASD-Possible	-0.361706	-1.0573	–	0.333885	0.683
12	beta	ncc	inferior parietal R	ASD-Unlikely vs ASD-Probable	-0.945835	-1.77148	–	-0.12019	0.252
12	beta	ncc	inferior parietal R	ASD-Possible vs ASD-Probable	-0.584129	-1.36769	–	0.199435	0.545
12	beta	ncc	inferior temporal L	ASD-Unlikely vs ASD-Possible	0.120761	-0.368864	–	0.610387	0.885
12	beta	ncc	inferior temporal L	ASD-Unlikely vs ASD-Probable	0.0477332	-0.55804	–	0.653507	0.95
12	beta	ncc	inferior temporal L	ASD-Possible vs ASD-Probable	-0.073028	-0.627322	–	0.481266	0.95
12	beta	ncc	inferior temporal R	ASD-Unlikely vs ASD-Possible	0.300512	-0.0970063	–	0.69803	0.545
12	beta	ncc	inferior temporal R	ASD-Unlikely vs ASD-Probable	-0.12787	-0.602292	–	0.346551	0.862
12	beta	ncc	inferior temporal R	ASD-Possible vs ASD-Probable	-0.428382	-0.883156	–	0.0263915	0.448
12	beta	ncc	insula L	ASD-Unlikely vs ASD-Possible	-0.135673	-0.561479	–	0.290133	0.832
12	beta	ncc	insula L	ASD-Unlikely vs ASD-Probable	-0.462182	-0.960753	–	0.0363886	0.456
12	beta	ncc	insula L	ASD-Possible vs ASD-Probable	-0.326509	-0.811626	–	0.158608	0.545
12	beta	ncc	insula R	ASD-Unlikely vs ASD-Possible	0.129871	-0.214462	–	0.474204	0.795
12	beta	ncc	insula R	ASD-Unlikely vs ASD-Probable	0.0360743	-0.369478	–	0.441626	0.95
12	beta	ncc	insula R	ASD-Possible vs ASD-Probable	-0.0937966	-0.494111	–	0.306518	0.889
12	beta	ncc	isthmus cingulate L	ASD-Unlikely vs ASD-Possible	-0.0370502	-0.40222	–	0.32812	0.95
12	beta	ncc	isthmus cingulate L	ASD-Unlikely vs ASD-Probable	-0.051472	-0.475129	–	0.372185	0.95
12	beta	ncc	isthmus cingulate L	ASD-Possible vs ASD-Probable	-0.0144218	-0.431983	–	0.403139	0.98
12	beta	ncc	isthmus cingulate R	ASD-Unlikely vs ASD-Possible	-0.0398057	-0.45763	–	0.378018	0.95
12	beta	ncc	isthmus cingulate R	ASD-Unlikely vs ASD-Probable	-0.259558	-0.746327	–	0.22721	0.671
12	beta	ncc	isthmus cingulate R	ASD-Possible vs ASD-Probable	-0.219753	-0.70179	–	0.262284	0.744
12	beta	ncc	lateral occipital L	ASD-Unlikely vs ASD-Possible	-0.210844	-0.68349	–	0.261801	0.744
12	beta	ncc	lateral occipital L	ASD-Unlikely vs ASD-Probable	-0.176799	-0.709152	–	0.355554	0.825
12	beta	ncc	lateral occipital L	ASD-Possible vs ASD-Probable	0.0340455	-0.48137	–	0.549461	0.958
12	beta	ncc	lateral occipital R	ASD-Unlikely vs ASD-Possible	-0.445097	-1.11727	–	0.227079	0.551
12	beta	ncc	lateral occipital R	ASD-Unlikely vs ASD-Probable	-0.258059	-1.01332	–	0.497198	0.814
12	beta	ncc	lateral occipital R	ASD-Possible vs ASD-Probable	0.187038	-0.500033	–	0.874109	0.862
12	beta	ncc	lateral orbitofrontal L	ASD-Unlikely vs ASD-Possible	-0.0870839	-0.41871	–	0.244542	0.862
12	beta	ncc	lateral orbitofrontal L	ASD-Unlikely vs ASD-Probable	-0.0914956	-0.484991	–	0.302	0.889
12	beta	ncc	lateral orbitofrontal L	ASD-Possible vs ASD-Probable	-0.00441165	-0.383033	–	0.37421	0.992
12	beta	ncc	lateral orbitofrontal R	ASD-Unlikely vs ASD-Possible	0.160701	-0.190892	–	0.512295	0.744
12	beta	ncc	lateral orbitofrontal R	ASD-Unlikely vs ASD-Probable	-0.0586135	-0.473716	–	0.356489	0.95
12	beta	ncc	lateral orbitofrontal R	ASD-Possible vs ASD-Probable	-0.219315	-0.616468	–	0.177838	0.64
12	beta	ncc	lingual L	ASD-Unlikely vs ASD-Possible	0.276455	-0.0334904	–	0.586401	0.483
12	beta	ncc	lingual L	ASD-Unlikely vs ASD-Probable	0.22731	-0.130123	–	0.584742	0.578
12	beta	ncc	lingual L	ASD-Possible vs ASD-Probable	-0.0491457	-0.400773	–	0.302481	0.95
12	beta	ncc	lingual R	ASD-Unlikely vs ASD-Possible	-0.143493	-0.535884	–	0.248897	0.795
12	beta	ncc	lingual R	ASD-Unlikely vs ASD-Probable	-0.0385932	-0.507584	–	0.430398	0.95
12	beta	ncc	lingual R	ASD-Possible vs ASD-Probable	0.1049	-0.362648	–	0.572449	0.892
12	beta	ncc	medial orbitofrontal L	ASD-Unlikely vs ASD-Possible	-0.0226489	-0.361265	–	0.315967	0.958
12	beta	ncc	medial orbitofrontal L	ASD-Unlikely vs ASD-Probable	-0.269439	-0.66199	–	0.123113	0.545
12	beta	ncc	medial orbitofrontal L	ASD-Possible vs ASD-Probable	-0.24679	-0.628848	–	0.135269	0.57
12	beta	ncc	medial orbitofrontal R	ASD-Unlikely vs ASD-Possible	0.180936	-0.117529	–	0.479401	0.606
12	beta	ncc	medial orbitofrontal R	ASD-Unlikely vs ASD-Probable	-0.0492015	-0.395987	–	0.297584	0.95
12	beta	ncc	medial orbitofrontal R	ASD-Possible vs ASD-Probable	-0.230137	-0.565879	–	0.105605	0.545
12	beta	ncc	middle temporal L	ASD-Unlikely vs ASD-Possible	-0.212927	-0.744731	–	0.318877	0.774
12	beta	ncc	middle temporal L	ASD-Unlikely vs ASD-Probable	-0.586048	-1.21061	–	0.0385159	0.448
12	beta	ncc	middle temporal L	ASD-Possible vs ASD-Probable	-0.373121	-0.977472	–	0.23123	0.606
12	beta	ncc	middle temporal R	ASD-Unlikely vs ASD-Possible	0.381716	-0.0835989	–	0.847032	0.515
12	beta	ncc	middle temporal R	ASD-Unlikely vs ASD-Probable	0.146395	-0.403263	–	0.696053	0.862
12	beta	ncc	middle temporal R	ASD-Possible vs ASD-Probable	-0.235322	-0.772168	–	0.301525	0.744
12	beta	ncc	paracentral L	ASD-Unlikely vs ASD-Possible	-0.235648	-0.726606	–	0.25531	0.732
12	beta	ncc	paracentral L	ASD-Unlikely vs ASD-Probable	-0.882354	-1.45219	–	-0.312522	0.07
12	beta	ncc	paracentral L	ASD-Possible vs ASD-Probable	-0.646706	-1.20755	–	-0.0858644	0.252
12	beta	ncc	paracentral R	ASD-Unlikely vs ASD-Possible	-0.453019	-1.0533	–	0.14726	0.545
12	beta	ncc	paracentral R	ASD-Unlikely vs ASD-Probable	-0.867564	-1.59839	–	-0.136741	0.24
12	beta	ncc	paracentral R	ASD-Possible vs ASD-Probable	-0.414545	-1.12975	–	0.300661	0.626
12	beta	ncc	parahippocampal L	ASD-Unlikely vs ASD-Possible	0.10532	-0.290477	–	0.501118	0.862
12	beta	ncc	parahippocampal L	ASD-Unlikely vs ASD-Probable	0.239269	-0.22859	–	0.707128	0.694
12	beta	ncc	parahippocampal L	ASD-Possible vs ASD-Probable	0.133949	-0.322862	–	0.59076	0.855
12	beta	ncc	parahippocampal R	ASD-Unlikely vs ASD-Possible	0.175241	-0.190953	–	0.541435	0.732
12	beta	ncc	parahippocampal R	ASD-Unlikely vs ASD-Probable	0.156159	-0.279878	–	0.592196	0.801
12	beta	ncc	parahippocampal R	ASD-Possible vs ASD-Probable	-0.0190821	-0.444328	–	0.406163	0.973
12	beta	ncc	pars opercularis L	ASD-Unlikely vs ASD-Possible	-0.0398834	-0.556596	–	0.476829	0.95
12	beta	ncc	pars opercularis L	ASD-Unlikely vs ASD-Probable	-0.468669	-1.06981	–	0.132473	0.545
12	beta	ncc	pars opercularis L	ASD-Possible vs ASD-Probable	-0.428785	-1.02613	–	0.168559	0.545
12	beta	ncc	pars opercularis R	ASD-Unlikely vs ASD-Possible	-0.00514294	-0.537778	–	0.527492	0.992
12	beta	ncc	pars opercularis R	ASD-Unlikely vs ASD-Probable	-0.49187	-1.10541	–	0.121674	0.515
12	beta	ncc	pars opercularis R	ASD-Possible vs ASD-Probable	-0.486727	-1.08911	–	0.115658	0.515
12	beta	ncc	pars orbitalis L	ASD-Unlikely vs ASD-Possible	-0.10154	-0.537508	–	0.334428	0.889
12	beta	ncc	pars orbitalis L	ASD-Unlikely vs ASD-Probable	-0.351232	-0.879191	–	0.176727	0.551
12	beta	ncc	pars orbitalis L	ASD-Possible vs ASD-Probable	-0.249692	-0.757743	–	0.25836	0.72
12	beta	ncc	pars orbitalis R	ASD-Unlikely vs ASD-Possible	-0.0467268	-0.436241	–	0.342788	0.95
12	beta	ncc	pars orbitalis R	ASD-Unlikely vs ASD-Probable	-0.497401	-0.956371	–	-0.0384311	0.275
12	beta	ncc	pars orbitalis R	ASD-Possible vs ASD-Probable	-0.450674	-0.901467	–	0.000119004	0.365
12	beta	ncc	pars triangularis L	ASD-Unlikely vs ASD-Possible	-0.19558	-0.692762	–	0.301602	0.782
12	beta	ncc	pars triangularis L	ASD-Unlikely vs ASD-Probable	-0.506819	-1.08893	–	0.0752913	0.485
12	beta	ncc	pars triangularis L	ASD-Possible vs ASD-Probable	-0.311239	-0.870343	–	0.247865	0.639
12	beta	ncc	pars triangularis R	ASD-Unlikely vs ASD-Possible	-0.0494096	-0.540715	–	0.441896	0.95
12	beta	ncc	pars triangularis R	ASD-Unlikely vs ASD-Probable	-0.441137	-1.02618	–	0.143904	0.545
12	beta	ncc	pars triangularis R	ASD-Possible vs ASD-Probable	-0.391728	-0.959006	–	0.17555	0.545
12	beta	ncc	pericalcarine L	ASD-Unlikely vs ASD-Possible	-0.213275	-0.5967	–	0.17015	0.639
12	beta	ncc	pericalcarine L	ASD-Unlikely vs ASD-Probable	-0.175189	-0.630423	–	0.280044	0.786
12	beta	ncc	pericalcarine L	ASD-Possible vs ASD-Probable	0.0380856	-0.395513	–	0.471684	0.95
12	beta	ncc	pericalcarine R	ASD-Unlikely vs ASD-Possible	-0.256625	-0.635949	–	0.122698	0.545
12	beta	ncc	pericalcarine R	ASD-Unlikely vs ASD-Probable	-0.176689	-0.633611	–	0.280233	0.786
12	beta	ncc	pericalcarine R	ASD-Possible vs ASD-Probable	0.0799359	-0.358549	–	0.51842	0.943
12	beta	ncc	postcentral L	ASD-Unlikely vs ASD-Possible	-0.555387	-1.19268	–	0.0819018	0.485
12	beta	ncc	postcentral L	ASD-Unlikely vs ASD-Probable	-0.616975	-1.32022	–	0.0862693	0.485
12	beta	ncc	postcentral L	ASD-Possible vs ASD-Probable	-0.0615884	-0.75309	–	0.629913	0.95
12	beta	ncc	postcentral R	ASD-Unlikely vs ASD-Possible	-0.288989	-0.928875	–	0.350896	0.744
12	beta	ncc	postcentral R	ASD-Unlikely vs ASD-Probable	-1.47454	-2.36389	–	-0.585188	0.07
12	beta	ncc	postcentral R	ASD-Possible vs ASD-Probable	-1.18555	-2.0897	–	-0.281393	0.207
12	beta	ncc	posterior cingulate L	ASD-Unlikely vs ASD-Possible	-0.632637	-1.20637	–	-0.0589036	0.272
12	beta	ncc	posterior cingulate L	ASD-Unlikely vs ASD-Probable	-0.757434	-1.44437	–	-0.0705012	0.272
12	beta	ncc	posterior cingulate L	ASD-Possible vs ASD-Probable	-0.124797	-0.779056	–	0.529461	0.936
12	beta	ncc	posterior cingulate R	ASD-Unlikely vs ASD-Possible	-0.450245	-0.981541	–	0.081051	0.501
12	beta	ncc	posterior cingulate R	ASD-Unlikely vs ASD-Probable	-0.762751	-1.38753	–	-0.137976	0.239
12	beta	ncc	posterior cingulate R	ASD-Possible vs ASD-Probable	-0.312506	-0.93503	–	0.310018	0.706
12	beta	ncc	precentral L	ASD-Unlikely vs ASD-Possible	-0.453624	-1.01343	–	0.106185	0.515
12	beta	ncc	precentral L	ASD-Unlikely vs ASD-Probable	-0.578242	-1.25357	–	0.0970849	0.501
12	beta	ncc	precentral L	ASD-Possible vs ASD-Probable	-0.124618	-0.783659	–	0.534423	0.936
12	beta	ncc	precentral R	ASD-Unlikely vs ASD-Possible	-0.354321	-0.904311	–	0.195669	0.57
12	beta	ncc	precentral R	ASD-Unlikely vs ASD-Probable	-1.07648	-1.74453	–	-0.408422	0.07
12	beta	ncc	precentral R	ASD-Possible vs ASD-Probable	-0.722154	-1.36896	–	-0.075351	0.272
12	beta	ncc	precuneus L	ASD-Unlikely vs ASD-Possible	-0.23731	-0.641989	–	0.167369	0.625
12	beta	ncc	precuneus L	ASD-Unlikely vs ASD-Probable	-0.583042	-1.05304	–	-0.113048	0.236
12	beta	ncc	precuneus L	ASD-Possible vs ASD-Probable	-0.345732	-0.812243	–	0.120778	0.545
12	beta	ncc	precuneus R	ASD-Unlikely vs ASD-Possible	-0.323521	-0.789394	–	0.142351	0.545
12	beta	ncc	precuneus R	ASD-Unlikely vs ASD-Probable	-0.819982	-1.36866	–	-0.271303	0.087
12	beta	ncc	precuneus R	ASD-Possible vs ASD-Probable	-0.496461	-1.04122	–	0.0483023	0.466
12	beta	ncc	rostral anterior cingulate L	ASD-Unlikely vs ASD-Possible	-0.130272	-0.483257	–	0.222713	0.795
12	beta	ncc	rostral anterior cingulate L	ASD-Unlikely vs ASD-Probable	-0.421859	-0.814614	–	-0.029104	0.277
12	beta	ncc	rostral anterior cingulate L	ASD-Possible vs ASD-Probable	-0.291587	-0.692444	–	0.10927	0.545
12	beta	ncc	rostral anterior cingulate R	ASD-Unlikely vs ASD-Possible	0.0342034	-0.294815	–	0.363222	0.95
12	beta	ncc	rostral anterior cingulate R	ASD-Unlikely vs ASD-Probable	-0.263704	-0.643109	–	0.115702	0.545
12	beta	ncc	rostral anterior cingulate R	ASD-Possible vs ASD-Probable	-0.297907	-0.669507	–	0.0736929	0.515
12	beta	ncc	rostral middle frontal L	ASD-Unlikely vs ASD-Possible	-0.279445	-0.873147	–	0.314256	0.737
12	beta	ncc	rostral middle frontal L	ASD-Unlikely vs ASD-Probable	-0.753121	-1.44339	–	-0.0628478	0.275
12	beta	ncc	rostral middle frontal L	ASD-Possible vs ASD-Probable	-0.473676	-1.12251	–	0.175159	0.545
12	beta	ncc	rostral middle frontal R	ASD-Unlikely vs ASD-Possible	0.150541	-0.425246	–	0.726327	0.862
12	beta	ncc	rostral middle frontal R	ASD-Unlikely vs ASD-Probable	-0.293621	-0.919294	–	0.332052	0.737
12	beta	ncc	rostral middle frontal R	ASD-Possible vs ASD-Probable	-0.444162	-1.07723	–	0.188904	0.545
12	beta	ncc	superior frontal L	ASD-Unlikely vs ASD-Possible	-0.266101	-0.887379	–	0.355178	0.748
12	beta	ncc	superior frontal L	ASD-Unlikely vs ASD-Probable	-0.945562	-1.70186	–	-0.189269	0.236
12	beta	ncc	superior frontal L	ASD-Possible vs ASD-Probable	-0.679461	-1.48492	–	0.125993	0.501
12	beta	ncc	superior frontal R	ASD-Unlikely vs ASD-Possible	-0.106725	-0.824728	–	0.611277	0.95
12	beta	ncc	superior frontal R	ASD-Unlikely vs ASD-Probable	-0.0968984	-0.885204	–	0.691407	0.95
12	beta	ncc	superior frontal R	ASD-Possible vs ASD-Probable	0.00982701	-0.795341	–	0.814995	0.992
12	beta	ncc	superior parietal L	ASD-Unlikely vs ASD-Possible	0.163675	-0.413814	–	0.741164	0.859
12	beta	ncc	superior parietal L	ASD-Unlikely vs ASD-Probable	-1.31202	-1.95955	–	-0.664489	0.007**
12	beta	ncc	superior parietal L	ASD-Possible vs ASD-Probable	-1.47569	-2.14934	–	-0.802046	0.004**
12	beta	ncc	superior parietal R	ASD-Unlikely vs ASD-Possible	-0.172527	-0.726551	–	0.381497	0.837
12	beta	ncc	superior parietal R	ASD-Unlikely vs ASD-Probable	-1.00377	-1.64344	–	-0.364089	0.07
12	beta	ncc	superior parietal R	ASD-Possible vs ASD-Probable	-0.831239	-1.49006	–	-0.172416	0.236
12	beta	ncc	superior temporal L	ASD-Unlikely vs ASD-Possible	0.0425991	-0.415316	–	0.500515	0.95
12	beta	ncc	superior temporal L	ASD-Unlikely vs ASD-Probable	-0.00473908	-0.557719	–	0.548241	0.992
12	beta	ncc	superior temporal L	ASD-Possible vs ASD-Probable	-0.0473382	-0.587901	–	0.493225	0.95
12	beta	ncc	superior temporal R	ASD-Unlikely vs ASD-Possible	0.403218	-0.0915383	–	0.897975	0.515
12	beta	ncc	superior temporal R	ASD-Unlikely vs ASD-Probable	0.164091	-0.418825	–	0.747007	0.859
12	beta	ncc	superior temporal R	ASD-Possible vs ASD-Probable	-0.239128	-0.796819	–	0.318563	0.748
12	beta	ncc	supramarginal L	ASD-Unlikely vs ASD-Possible	-0.494337	-1.32784	–	0.339168	0.625
12	beta	ncc	supramarginal L	ASD-Unlikely vs ASD-Probable	-0.736166	-1.54779	–	0.075456	0.466
12	beta	ncc	supramarginal L	ASD-Possible vs ASD-Probable	-0.241829	-1.07922	–	0.595563	0.857
12	beta	ncc	supramarginal R	ASD-Unlikely vs ASD-Possible	-0.361292	-1.26334	–	0.540753	0.774
12	beta	ncc	supramarginal R	ASD-Unlikely vs ASD-Probable	-1.59283	-2.60831	–	-0.577344	0.07
12	beta	ncc	supramarginal R	ASD-Possible vs ASD-Probable	-1.23154	-2.0849	–	-0.378173	0.106
12	beta	ncc	temporal pole L	ASD-Unlikely vs ASD-Possible	-0.160099	-0.524617	–	0.204419	0.744
12	beta	ncc	temporal pole L	ASD-Unlikely vs ASD-Probable	-0.136671	-0.5677	–	0.294359	0.832
12	beta	ncc	temporal pole L	ASD-Possible vs ASD-Probable	0.023428	-0.395999	–	0.442856	0.962
12	beta	ncc	temporal pole R	ASD-Unlikely vs ASD-Possible	-0.0288481	-0.366374	–	0.308678	0.95
12	beta	ncc	temporal pole R	ASD-Unlikely vs ASD-Probable	-0.165498	-0.562316	–	0.231321	0.753
12	beta	ncc	temporal pole R	ASD-Possible vs ASD-Probable	-0.13665	-0.522597	–	0.249298	0.802
12	beta	ncc	transverse temporal L	ASD-Unlikely vs ASD-Possible	0.235032	-0.294879	–	0.764943	0.744
12	beta	ncc	transverse temporal L	ASD-Unlikely vs ASD-Probable	0.231571	-0.401996	–	0.865137	0.795
12	beta	ncc	transverse temporal L	ASD-Possible vs ASD-Probable	-0.00346142	-0.618685	–	0.611762	0.992
12	beta	ncc	transverse temporal R	ASD-Unlikely vs ASD-Possible	-0.0374477	-0.699788	–	0.624893	0.962
12	beta	ncc	transverse temporal R	ASD-Unlikely vs ASD-Probable	-0.560065	-1.34064	–	0.220509	0.545
12	beta	ncc	transverse temporal R	ASD-Possible vs ASD-Probable	-0.522617	-1.29313	–	0.247895	0.545
12	beta	npl	bankssts L	ASD-Unlikely vs ASD-Possible	-0.0486591	-0.290576	–	0.193258	0.818
12	beta	npl	bankssts L	ASD-Unlikely vs ASD-Probable	-0.220865	-0.480186	–	0.0384554	0.431
12	beta	npl	bankssts L	ASD-Possible vs ASD-Probable	-0.172206	-0.422539	–	0.0781261	0.482
12	beta	npl	bankssts R	ASD-Unlikely vs ASD-Possible	-0.0928731	-0.28	–	0.094254	0.582
12	beta	npl	bankssts R	ASD-Unlikely vs ASD-Probable	-0.209769	-0.40601	–	-0.0135275	0.333
12	beta	npl	bankssts R	ASD-Possible vs ASD-Probable	-0.116896	-0.309756	–	0.0759642	0.504
12	beta	npl	caudal anterior cingulate L	ASD-Unlikely vs ASD-Possible	-0.132485	-0.40115	–	0.136181	0.582
12	beta	npl	caudal anterior cingulate L	ASD-Unlikely vs ASD-Probable	-0.327548	-0.615321	–	-0.039776	0.333
12	beta	npl	caudal anterior cingulate L	ASD-Possible vs ASD-Probable	-0.195064	-0.472981	–	0.0828535	0.482
12	beta	npl	caudal anterior cingulate R	ASD-Unlikely vs ASD-Possible	-0.16482	-0.508968	–	0.179328	0.591
12	beta	npl	caudal anterior cingulate R	ASD-Unlikely vs ASD-Probable	-0.381611	-0.744271	–	-0.0189511	0.333
12	beta	npl	caudal anterior cingulate R	ASD-Possible vs ASD-Probable	-0.216791	-0.571446	–	0.137864	0.501
12	beta	npl	caudal middle frontal L	ASD-Unlikely vs ASD-Possible	-0.211883	-0.470216	–	0.0464489	0.435
12	beta	npl	caudal middle frontal L	ASD-Unlikely vs ASD-Probable	-0.252428	-0.53429	–	0.0294341	0.394
12	beta	npl	caudal middle frontal L	ASD-Possible vs ASD-Probable	-0.0405448	-0.308658	–	0.227568	0.884
12	beta	npl	caudal middle frontal R	ASD-Unlikely vs ASD-Possible	-0.116486	-0.460098	–	0.227126	0.698
12	beta	npl	caudal middle frontal R	ASD-Unlikely vs ASD-Probable	-0.309168	-0.666193	–	0.0478572	0.424
12	beta	npl	caudal middle frontal R	ASD-Possible vs ASD-Probable	-0.192682	-0.547386	–	0.162021	0.557
12	beta	npl	cuneus L	ASD-Unlikely vs ASD-Possible	-0.0502543	-0.233863	–	0.133355	0.759
12	beta	npl	cuneus L	ASD-Unlikely vs ASD-Probable	-0.208592	-0.401819	–	-0.0153652	0.333
12	beta	npl	cuneus L	ASD-Possible vs ASD-Probable	-0.158338	-0.347401	–	0.0307252	0.431
12	beta	npl	cuneus R	ASD-Unlikely vs ASD-Possible	-0.0965304	-0.340146	–	0.147085	0.656
12	beta	npl	cuneus R	ASD-Unlikely vs ASD-Probable	-0.182629	-0.433023	–	0.0677661	0.469
12	beta	npl	cuneus R	ASD-Possible vs ASD-Probable	-0.0860982	-0.33499	–	0.162793	0.693
12	beta	npl	entorhinal L	ASD-Unlikely vs ASD-Possible	-0.0596339	-0.173	–	0.0537318	0.566
12	beta	npl	entorhinal L	ASD-Unlikely vs ASD-Probable	-0.179958	-0.298643	–	-0.0612728	0.151
12	beta	npl	entorhinal L	ASD-Possible vs ASD-Probable	-0.120324	-0.237466	–	-0.00318212	0.333
12	beta	npl	entorhinal R	ASD-Unlikely vs ASD-Possible	-0.111188	-0.254271	–	0.0318957	0.457
12	beta	npl	entorhinal R	ASD-Unlikely vs ASD-Probable	-0.1184	-0.269063	–	0.0322618	0.45
12	beta	npl	entorhinal R	ASD-Possible vs ASD-Probable	-0.00721257	-0.155421	–	0.140996	0.957
12	beta	npl	frontal pole L	ASD-Unlikely vs ASD-Possible	-0.0672766	-0.201704	–	0.0671508	0.582
12	beta	npl	frontal pole L	ASD-Unlikely vs ASD-Probable	-0.0813212	-0.223717	–	0.0610747	0.537
12	beta	npl	frontal pole L	ASD-Possible vs ASD-Probable	-0.0140446	-0.153279	–	0.12519	0.925
12	beta	npl	frontal pole R	ASD-Unlikely vs ASD-Possible	-0.0693312	-0.213672	–	0.0750098	0.591
12	beta	npl	frontal pole R	ASD-Unlikely vs ASD-Probable	0.033324	-0.117888	–	0.184536	0.794
12	beta	npl	frontal pole R	ASD-Possible vs ASD-Probable	0.102655	-0.047257	–	0.252567	0.482
12	beta	npl	fusiform L	ASD-Unlikely vs ASD-Possible	-0.0773509	-0.206517	–	0.0518153	0.506
12	beta	npl	fusiform L	ASD-Unlikely vs ASD-Probable	-0.185828	-0.324809	–	-0.0468473	0.182
12	beta	npl	fusiform L	ASD-Possible vs ASD-Probable	-0.108477	-0.24216	–	0.0252054	0.435
12	beta	npl	fusiform R	ASD-Unlikely vs ASD-Possible	-0.212493	-0.446836	–	0.0218505	0.394
12	beta	npl	fusiform R	ASD-Unlikely vs ASD-Probable	-0.223223	-0.468509	–	0.0220623	0.394
12	beta	npl	fusiform R	ASD-Possible vs ASD-Probable	-0.0107307	-0.251671	–	0.230209	0.959
12	beta	npl	inferior parietal L	ASD-Unlikely vs ASD-Possible	-0.252295	-0.532498	–	0.0279085	0.394
12	beta	npl	inferior parietal L	ASD-Unlikely vs ASD-Probable	-0.451145	-0.743198	–	-0.159093	0.151
12	beta	npl	inferior parietal L	ASD-Possible vs ASD-Probable	-0.198851	-0.485573	–	0.0878719	0.482
12	beta	npl	inferior parietal R	ASD-Unlikely vs ASD-Possible	-0.158101	-0.533209	–	0.217006	0.644
12	beta	npl	inferior parietal R	ASD-Unlikely vs ASD-Probable	-0.285108	-0.677024	–	0.106807	0.469
12	beta	npl	inferior parietal R	ASD-Possible vs ASD-Probable	-0.127007	-0.510757	–	0.256743	0.703
12	beta	npl	inferior temporal L	ASD-Unlikely vs ASD-Possible	-0.0915743	-0.223711	–	0.0405626	0.482
12	beta	npl	inferior temporal L	ASD-Unlikely vs ASD-Probable	-0.186719	-0.323462	–	-0.0499762	0.182
12	beta	npl	inferior temporal L	ASD-Possible vs ASD-Probable	-0.0951447	-0.231335	–	0.0410454	0.482
12	beta	npl	inferior temporal R	ASD-Unlikely vs ASD-Possible	-0.0618908	-0.249136	–	0.125354	0.703
12	beta	npl	inferior temporal R	ASD-Unlikely vs ASD-Probable	-0.19863	-0.403983	–	0.00672333	0.359
12	beta	npl	inferior temporal R	ASD-Possible vs ASD-Probable	-0.136739	-0.33372	–	0.0602419	0.482
12	beta	npl	insula L	ASD-Unlikely vs ASD-Possible	-0.0568149	-0.180332	–	0.0667017	0.604
12	beta	npl	insula L	ASD-Unlikely vs ASD-Probable	-0.129643	-0.262024	–	0.00273681	0.359
12	beta	npl	insula L	ASD-Possible vs ASD-Probable	-0.0728285	-0.201029	–	0.0553721	0.537
12	beta	npl	insula R	ASD-Unlikely vs ASD-Possible	-0.0922003	-0.216113	–	0.0317123	0.469
12	beta	npl	insula R	ASD-Unlikely vs ASD-Probable	-0.0992027	-0.233511	–	0.035106	0.469
12	beta	npl	insula R	ASD-Possible vs ASD-Probable	-0.00700241	-0.13614	–	0.122135	0.955
12	beta	npl	isthmus cingulate L	ASD-Unlikely vs ASD-Possible	0.0493358	-0.0906571	–	0.189329	0.689
12	beta	npl	isthmus cingulate L	ASD-Unlikely vs ASD-Probable	-0.0373706	-0.189109	–	0.114368	0.769
12	beta	npl	isthmus cingulate L	ASD-Possible vs ASD-Probable	-0.0867064	-0.231507	–	0.058094	0.506
12	beta	npl	isthmus cingulate R	ASD-Unlikely vs ASD-Possible	0.0699712	-0.120375	–	0.260318	0.668
12	beta	npl	isthmus cingulate R	ASD-Unlikely vs ASD-Probable	-0.092164	-0.301869	–	0.117541	0.627
12	beta	npl	isthmus cingulate R	ASD-Possible vs ASD-Probable	-0.162135	-0.362051	–	0.0377801	0.435
12	beta	npl	lateral occipital L	ASD-Unlikely vs ASD-Possible	-0.0966688	-0.290334	–	0.0969961	0.582
12	beta	npl	lateral occipital L	ASD-Unlikely vs ASD-Probable	-0.222764	-0.422321	–	-0.0232059	0.333
12	beta	npl	lateral occipital L	ASD-Possible vs ASD-Probable	-0.126095	-0.324848	–	0.0726585	0.489
12	beta	npl	lateral occipital R	ASD-Unlikely vs ASD-Possible	-0.0409814	-0.380492	–	0.298529	0.911
12	beta	npl	lateral occipital R	ASD-Unlikely vs ASD-Probable	-0.327995	-0.667251	–	0.0112604	0.359
12	beta	npl	lateral occipital R	ASD-Possible vs ASD-Probable	-0.287014	-0.633989	–	0.0599611	0.435
12	beta	npl	lateral orbitofrontal L	ASD-Unlikely vs ASD-Possible	0.0464589	-0.14577	–	0.238688	0.769
12	beta	npl	lateral orbitofrontal L	ASD-Unlikely vs ASD-Probable	-0.0529037	-0.257173	–	0.151366	0.761
12	beta	npl	lateral orbitofrontal L	ASD-Possible vs ASD-Probable	-0.0993627	-0.298307	–	0.0995813	0.582
12	beta	npl	lateral orbitofrontal R	ASD-Unlikely vs ASD-Possible	-0.0446605	-0.163091	–	0.0737704	0.667
12	beta	npl	lateral orbitofrontal R	ASD-Unlikely vs ASD-Probable	-0.114535	-0.241422	–	0.0123529	0.394
12	beta	npl	lateral orbitofrontal R	ASD-Possible vs ASD-Probable	-0.0698741	-0.193133	–	0.0533846	0.537
12	beta	npl	lingual L	ASD-Unlikely vs ASD-Possible	-0.0521877	-0.18694	–	0.0825646	0.666
12	beta	npl	lingual L	ASD-Unlikely vs ASD-Probable	-0.0626017	-0.205418	–	0.0802145	0.627
12	beta	npl	lingual L	ASD-Possible vs ASD-Probable	-0.010414	-0.150403	–	0.129575	0.939
12	beta	npl	lingual R	ASD-Unlikely vs ASD-Possible	-0.0249656	-0.270934	–	0.221003	0.925
12	beta	npl	lingual R	ASD-Unlikely vs ASD-Probable	-0.188012	-0.440521	–	0.0644979	0.469
12	beta	npl	lingual R	ASD-Possible vs ASD-Probable	-0.163046	-0.415318	–	0.0892262	0.487
12	beta	npl	medial orbitofrontal L	ASD-Unlikely vs ASD-Possible	-0.0217311	-0.178168	–	0.134706	0.89
12	beta	npl	medial orbitofrontal L	ASD-Unlikely vs ASD-Probable	-0.133537	-0.299709	–	0.0326358	0.435
12	beta	npl	medial orbitofrontal L	ASD-Possible vs ASD-Probable	-0.111806	-0.273845	–	0.0502339	0.482
12	beta	npl	medial orbitofrontal R	ASD-Unlikely vs ASD-Possible	-0.0542985	-0.196282	–	0.0876851	0.666
12	beta	npl	medial orbitofrontal R	ASD-Unlikely vs ASD-Probable	-0.0929436	-0.244542	–	0.0586544	0.501
12	beta	npl	medial orbitofrontal R	ASD-Possible vs ASD-Probable	-0.0386451	-0.186329	–	0.109038	0.761
12	beta	npl	middle temporal L	ASD-Unlikely vs ASD-Possible	0.0796073	-0.0798145	–	0.239029	0.582
12	beta	npl	middle temporal L	ASD-Unlikely vs ASD-Probable	-0.0910668	-0.26127	–	0.0791367	0.557
12	beta	npl	middle temporal L	ASD-Possible vs ASD-Probable	-0.170674	-0.336571	–	-0.00477705	0.333
12	beta	npl	middle temporal R	ASD-Unlikely vs ASD-Possible	-0.170222	-0.331115	–	-0.00932997	0.333
12	beta	npl	middle temporal R	ASD-Unlikely vs ASD-Probable	-0.279166	-0.444944	–	-0.113387	0.151
12	beta	npl	middle temporal R	ASD-Possible vs ASD-Probable	-0.108943	-0.275203	–	0.0573161	0.487
12	beta	npl	paracentral L	ASD-Unlikely vs ASD-Possible	-0.0745109	-0.359548	–	0.210526	0.761
12	beta	npl	paracentral L	ASD-Unlikely vs ASD-Probable	-0.125314	-0.422484	–	0.171855	0.644
12	beta	npl	paracentral L	ASD-Possible vs ASD-Probable	-0.0508034	-0.342756	–	0.241149	0.85
12	beta	npl	paracentral R	ASD-Unlikely vs ASD-Possible	-0.214003	-0.479886	–	0.0518801	0.435
12	beta	npl	paracentral R	ASD-Unlikely vs ASD-Probable	-0.177756	-0.459162	–	0.103649	0.489
12	beta	npl	paracentral R	ASD-Possible vs ASD-Probable	0.0362466	-0.238807	–	0.3113	0.897
12	beta	npl	parahippocampal L	ASD-Unlikely vs ASD-Possible	-0.0212342	-0.13849	–	0.0960219	0.847
12	beta	npl	parahippocampal L	ASD-Unlikely vs ASD-Probable	-0.0789778	-0.203748	–	0.0457926	0.489
12	beta	npl	parahippocampal L	ASD-Possible vs ASD-Probable	-0.0577436	-0.179147	–	0.0636597	0.592
12	beta	npl	parahippocampal R	ASD-Unlikely vs ASD-Possible	0.0175062	-0.192612	–	0.227624	0.934
12	beta	npl	parahippocampal R	ASD-Unlikely vs ASD-Probable	-0.208742	-0.4274	–	0.00991624	0.368
12	beta	npl	parahippocampal R	ASD-Possible vs ASD-Probable	-0.226248	-0.443652	–	-0.00884348	0.333
12	beta	npl	pars opercularis L	ASD-Unlikely vs ASD-Possible	-0.110305	-0.289629	–	0.0690187	0.501
12	beta	npl	pars opercularis L	ASD-Unlikely vs ASD-Probable	-0.187911	-0.377369	–	0.00154722	0.353
12	beta	npl	pars opercularis L	ASD-Possible vs ASD-Probable	-0.077606	-0.263512	–	0.1083	0.644
12	beta	npl	pars opercularis R	ASD-Unlikely vs ASD-Possible	-0.0135992	-0.203942	–	0.176744	0.939
12	beta	npl	pars opercularis R	ASD-Unlikely vs ASD-Probable	-0.0608911	-0.264299	–	0.142517	0.734
12	beta	npl	pars opercularis R	ASD-Possible vs ASD-Probable	-0.0472919	-0.243665	–	0.149081	0.769
12	beta	npl	pars orbitalis L	ASD-Unlikely vs ASD-Possible	-0.0719833	-0.206654	–	0.0626874	0.557
12	beta	npl	pars orbitalis L	ASD-Unlikely vs ASD-Probable	-0.219188	-0.36006	–	-0.0783164	0.151
12	beta	npl	pars orbitalis L	ASD-Possible vs ASD-Probable	-0.147205	-0.28656	–	-0.00784945	0.333
12	beta	npl	pars orbitalis R	ASD-Unlikely vs ASD-Possible	0.00935477	-0.166738	–	0.185447	0.955
12	beta	npl	pars orbitalis R	ASD-Unlikely vs ASD-Probable	-0.124329	-0.311762	–	0.0631037	0.487
12	beta	npl	pars orbitalis R	ASD-Possible vs ASD-Probable	-0.133684	-0.317132	–	0.0497638	0.469
12	beta	npl	pars triangularis L	ASD-Unlikely vs ASD-Possible	-0.00461626	-0.172551	–	0.163319	0.967
12	beta	npl	pars triangularis L	ASD-Unlikely vs ASD-Probable	-0.117095	-0.293161	–	0.0589707	0.487
12	beta	npl	pars triangularis L	ASD-Possible vs ASD-Probable	-0.112479	-0.286379	–	0.061421	0.487
12	beta	npl	pars triangularis R	ASD-Unlikely vs ASD-Possible	0.0237461	-0.18287	–	0.230362	0.916
12	beta	npl	pars triangularis R	ASD-Unlikely vs ASD-Probable	0.0199807	-0.202521	–	0.242483	0.929
12	beta	npl	pars triangularis R	ASD-Possible vs ASD-Probable	-0.00376541	-0.218851	–	0.21132	0.977
12	beta	npl	pericalcarine L	ASD-Unlikely vs ASD-Possible	-0.0222198	-0.17534	–	0.130901	0.888
12	beta	npl	pericalcarine L	ASD-Unlikely vs ASD-Probable	-0.128945	-0.291587	–	0.0336965	0.446
12	beta	npl	pericalcarine L	ASD-Possible vs ASD-Probable	-0.106726	-0.26543	–	0.0519786	0.487
12	beta	npl	pericalcarine R	ASD-Unlikely vs ASD-Possible	-0.00951714	-0.287276	–	0.268242	0.964
12	beta	npl	pericalcarine R	ASD-Unlikely vs ASD-Probable	-0.074593	-0.356645	–	0.207459	0.761
12	beta	npl	pericalcarine R	ASD-Possible vs ASD-Probable	-0.0650759	-0.350108	–	0.219956	0.785
12	beta	npl	postcentral L	ASD-Unlikely vs ASD-Possible	-0.107283	-0.392541	–	0.177974	0.667
12	beta	npl	postcentral L	ASD-Unlikely vs ASD-Probable	-0.247066	-0.542603	–	0.0484719	0.431
12	beta	npl	postcentral L	ASD-Possible vs ASD-Probable	-0.139782	-0.430988	–	0.151423	0.591
12	beta	npl	postcentral R	ASD-Unlikely vs ASD-Possible	-0.176448	-0.44163	–	0.0887331	0.487
12	beta	npl	postcentral R	ASD-Unlikely vs ASD-Probable	-0.356199	-0.629817	–	-0.0825812	0.182
12	beta	npl	postcentral R	ASD-Possible vs ASD-Probable	-0.179751	-0.452462	–	0.0929601	0.487
12	beta	npl	posterior cingulate L	ASD-Unlikely vs ASD-Possible	0.012135	-0.29163	–	0.3159	0.961
12	beta	npl	posterior cingulate L	ASD-Unlikely vs ASD-Probable	-0.172109	-0.493261	–	0.149042	0.557
12	beta	npl	posterior cingulate L	ASD-Possible vs ASD-Probable	-0.184244	-0.497215	–	0.128726	0.517
12	beta	npl	posterior cingulate R	ASD-Unlikely vs ASD-Possible	-0.0178192	-0.253863	–	0.218224	0.939
12	beta	npl	posterior cingulate R	ASD-Unlikely vs ASD-Probable	-0.102097	-0.354659	–	0.150465	0.647
12	beta	npl	posterior cingulate R	ASD-Possible vs ASD-Probable	-0.084278	-0.328977	–	0.160421	0.693
12	beta	npl	precentral L	ASD-Unlikely vs ASD-Possible	0.0247672	-0.23131	–	0.280844	0.927
12	beta	npl	precentral L	ASD-Unlikely vs ASD-Probable	-0.167368	-0.436431	–	0.101694	0.499
12	beta	npl	precentral L	ASD-Possible vs ASD-Probable	-0.192135	-0.455274	–	0.0710029	0.469
12	beta	npl	precentral R	ASD-Unlikely vs ASD-Possible	0.00840453	-0.250971	–	0.26778	0.964
12	beta	npl	precentral R	ASD-Unlikely vs ASD-Probable	-0.275051	-0.545432	–	-0.00467077	0.336
12	beta	npl	precentral R	ASD-Possible vs ASD-Probable	-0.283456	-0.552296	–	-0.0146159	0.333
12	beta	npl	precuneus L	ASD-Unlikely vs ASD-Possible	0.00127542	-0.241025	–	0.243576	0.992
12	beta	npl	precuneus L	ASD-Unlikely vs ASD-Probable	-0.10254	-0.35013	–	0.14505	0.644
12	beta	npl	precuneus L	ASD-Possible vs ASD-Probable	-0.103815	-0.353518	–	0.145888	0.644
12	beta	npl	precuneus R	ASD-Unlikely vs ASD-Possible	0.0887595	-0.203031	–	0.38055	0.734
12	beta	npl	precuneus R	ASD-Unlikely vs ASD-Probable	-0.0329163	-0.341188	–	0.275355	0.925
12	beta	npl	precuneus R	ASD-Possible vs ASD-Probable	-0.121676	-0.421954	–	0.178603	0.647
12	beta	npl	rostral anterior cingulate L	ASD-Unlikely vs ASD-Possible	-0.0273991	-0.185241	–	0.130443	0.85
12	beta	npl	rostral anterior cingulate L	ASD-Unlikely vs ASD-Probable	-0.0785363	-0.246806	–	0.0897335	0.602
12	beta	npl	rostral anterior cingulate L	ASD-Possible vs ASD-Probable	-0.0511373	-0.215578	–	0.113304	0.732
12	beta	npl	rostral anterior cingulate R	ASD-Unlikely vs ASD-Possible	0.0646367	-0.0648497	–	0.194123	0.582
12	beta	npl	rostral anterior cingulate R	ASD-Unlikely vs ASD-Probable	-0.0519989	-0.193221	–	0.0892234	0.668
12	beta	npl	rostral anterior cingulate R	ASD-Possible vs ASD-Probable	-0.116636	-0.25209	–	0.0188186	0.424
12	beta	npl	rostral middle frontal L	ASD-Unlikely vs ASD-Possible	-0.0656119	-0.285134	–	0.15391	0.734
12	beta	npl	rostral middle frontal L	ASD-Unlikely vs ASD-Probable	-0.152837	-0.381096	–	0.0754227	0.487
12	beta	npl	rostral middle frontal L	ASD-Possible vs ASD-Probable	-0.0872247	-0.314562	–	0.140112	0.666
12	beta	npl	rostral middle frontal R	ASD-Unlikely vs ASD-Possible	-0.147584	-0.349503	–	0.0543352	0.469
12	beta	npl	rostral middle frontal R	ASD-Unlikely vs ASD-Probable	-0.0956979	-0.305475	–	0.114079	0.606
12	beta	npl	rostral middle frontal R	ASD-Possible vs ASD-Probable	0.0518862	-0.157318	–	0.26109	0.769
12	beta	npl	superior frontal L	ASD-Unlikely vs ASD-Possible	-0.113429	-0.359055	–	0.132197	0.604
12	beta	npl	superior frontal L	ASD-Unlikely vs ASD-Probable	-0.33978	-0.600581	–	-0.0789796	0.182
12	beta	npl	superior frontal L	ASD-Possible vs ASD-Probable	-0.226351	-0.481261	–	0.0285582	0.397
12	beta	npl	superior frontal R	ASD-Unlikely vs ASD-Possible	-0.0372077	-0.297419	–	0.223004	0.888
12	beta	npl	superior frontal R	ASD-Unlikely vs ASD-Probable	-0.183325	-0.447814	–	0.0811642	0.482
12	beta	npl	superior frontal R	ASD-Possible vs ASD-Probable	-0.146117	-0.412441	–	0.120207	0.554
12	beta	npl	superior parietal L	ASD-Unlikely vs ASD-Possible	-0.0633803	-0.316578	–	0.189817	0.769
12	beta	npl	superior parietal L	ASD-Unlikely vs ASD-Probable	-0.359727	-0.630121	–	-0.0893331	0.182
12	beta	npl	superior parietal L	ASD-Possible vs ASD-Probable	-0.296347	-0.558082	–	-0.0346112	0.333
12	beta	npl	superior parietal R	ASD-Unlikely vs ASD-Possible	-0.0977481	-0.417463	–	0.221967	0.734
12	beta	npl	superior parietal R	ASD-Unlikely vs ASD-Probable	-0.185489	-0.522753	–	0.151774	0.554
12	beta	npl	superior parietal R	ASD-Possible vs ASD-Probable	-0.0877413	-0.415033	–	0.23955	0.761
12	beta	npl	superior temporal L	ASD-Unlikely vs ASD-Possible	0.00890075	-0.148707	–	0.166509	0.955
12	beta	npl	superior temporal L	ASD-Unlikely vs ASD-Probable	-0.156816	-0.32782	–	0.0141885	0.394
12	beta	npl	superior temporal L	ASD-Possible vs ASD-Probable	-0.165716	-0.329926	–	-0.00150633	0.337
12	beta	npl	superior temporal R	ASD-Unlikely vs ASD-Possible	-0.0330323	-0.149779	–	0.0837145	0.749
12	beta	npl	superior temporal R	ASD-Unlikely vs ASD-Probable	-0.111056	-0.231941	–	0.00982939	0.394
12	beta	npl	superior temporal R	ASD-Possible vs ASD-Probable	-0.0780235	-0.198673	–	0.042626	0.487
12	beta	npl	supramarginal L	ASD-Unlikely vs ASD-Possible	-0.15093	-0.386495	–	0.0846342	0.489
12	beta	npl	supramarginal L	ASD-Unlikely vs ASD-Probable	-0.334903	-0.582591	–	-0.0872147	0.182
12	beta	npl	supramarginal L	ASD-Possible vs ASD-Probable	-0.183973	-0.428405	–	0.0604598	0.469
12	beta	npl	supramarginal R	ASD-Unlikely vs ASD-Possible	-0.103473	-0.355257	–	0.148312	0.645
12	beta	npl	supramarginal R	ASD-Unlikely vs ASD-Probable	-0.370491	-0.626085	–	-0.114897	0.182
12	beta	npl	supramarginal R	ASD-Possible vs ASD-Probable	-0.267018	-0.524997	–	-0.00903938	0.333
12	beta	npl	temporal pole L	ASD-Unlikely vs ASD-Possible	-0.0565388	-0.209892	–	0.0968149	0.668
12	beta	npl	temporal pole L	ASD-Unlikely vs ASD-Probable	-0.221972	-0.38386	–	-0.0600854	0.182
12	beta	npl	temporal pole L	ASD-Possible vs ASD-Probable	-0.165434	-0.324789	–	-0.0060789	0.333
12	beta	npl	temporal pole R	ASD-Unlikely vs ASD-Possible	-0.0768662	-0.212988	–	0.0592561	0.537
12	beta	npl	temporal pole R	ASD-Unlikely vs ASD-Probable	-0.118086	-0.259002	–	0.0228289	0.431
12	beta	npl	temporal pole R	ASD-Possible vs ASD-Probable	-0.0412202	-0.182273	–	0.0998325	0.741
12	beta	npl	transverse temporal L	ASD-Unlikely vs ASD-Possible	-0.0171297	-0.201297	–	0.167038	0.928
12	beta	npl	transverse temporal L	ASD-Unlikely vs ASD-Probable	-0.0561279	-0.255099	–	0.142843	0.749
12	beta	npl	transverse temporal L	ASD-Possible vs ASD-Probable	-0.0389982	-0.230694	–	0.152698	0.818
12	beta	npl	transverse temporal R	ASD-Unlikely vs ASD-Possible	-0.0829104	-0.245428	–	0.0796074	0.582
12	beta	npl	transverse temporal R	ASD-Unlikely vs ASD-Probable	-0.207654	-0.378096	–	-0.0372121	0.266
12	beta	npl	transverse temporal R	ASD-Possible vs ASD-Probable	-0.124744	-0.292633	–	0.0431457	0.469
12	gamma	ncc	bankssts L	ASD-Unlikely vs ASD-Possible	-0.510579	-1.27152	–	0.250362	0.997
12	gamma	ncc	bankssts L	ASD-Unlikely vs ASD-Probable	-0.509252	-1.39129	–	0.372788	0.997
12	gamma	ncc	bankssts L	ASD-Possible vs ASD-Probable	0.00132685	-0.825743	–	0.828397	0.997
12	gamma	ncc	bankssts R	ASD-Unlikely vs ASD-Possible	-0.281476	-0.870013	–	0.307062	0.997
12	gamma	ncc	bankssts R	ASD-Unlikely vs ASD-Probable	-0.258496	-0.947565	–	0.430573	0.997
12	gamma	ncc	bankssts R	ASD-Possible vs ASD-Probable	0.0229797	-0.668868	–	0.714827	0.997
12	gamma	ncc	caudal anterior cingulate L	ASD-Unlikely vs ASD-Possible	0.0236168	-0.58868	–	0.635914	0.997
12	gamma	ncc	caudal anterior cingulate L	ASD-Unlikely vs ASD-Probable	-0.0681915	-0.742866	–	0.606483	0.997
12	gamma	ncc	caudal anterior cingulate L	ASD-Possible vs ASD-Probable	-0.0918083	-0.772689	–	0.589072	0.997
12	gamma	ncc	caudal anterior cingulate R	ASD-Unlikely vs ASD-Possible	-0.286614	-0.846628	–	0.2734	0.997
12	gamma	ncc	caudal anterior cingulate R	ASD-Unlikely vs ASD-Probable	-0.297207	-0.975899	–	0.381486	0.997
12	gamma	ncc	caudal anterior cingulate R	ASD-Possible vs ASD-Probable	-0.0105925	-0.653027	–	0.631842	0.997
12	gamma	ncc	caudal middle frontal L	ASD-Unlikely vs ASD-Possible	-0.846809	-1.7515	–	0.0578868	0.997
12	gamma	ncc	caudal middle frontal L	ASD-Unlikely vs ASD-Probable	-0.925071	-2.0102	–	0.160061	0.997
12	gamma	ncc	caudal middle frontal L	ASD-Possible vs ASD-Probable	-0.0782623	-1.09364	–	0.937116	0.997
12	gamma	ncc	caudal middle frontal R	ASD-Unlikely vs ASD-Possible	0.354824	-0.585225	–	1.29487	0.997
12	gamma	ncc	caudal middle frontal R	ASD-Unlikely vs ASD-Probable	-0.578535	-1.78998	–	0.632906	0.997
12	gamma	ncc	caudal middle frontal R	ASD-Possible vs ASD-Probable	-0.933359	-2.08984	–	0.223123	0.997
12	gamma	ncc	cuneus L	ASD-Unlikely vs ASD-Possible	-0.503585	-1.09426	–	0.0870864	0.997
12	gamma	ncc	cuneus L	ASD-Unlikely vs ASD-Probable	-0.243881	-1.01819	–	0.530429	0.997
12	gamma	ncc	cuneus L	ASD-Possible vs ASD-Probable	0.259704	-0.480857	–	1.00027	0.997
12	gamma	ncc	cuneus R	ASD-Unlikely vs ASD-Possible	-0.24874	-0.823534	–	0.326054	0.997
12	gamma	ncc	cuneus R	ASD-Unlikely vs ASD-Probable	-0.909426	-1.58113	–	-0.237726	0.325
12	gamma	ncc	cuneus R	ASD-Possible vs ASD-Probable	-0.660686	-1.33402	–	0.0126504	0.997
12	gamma	ncc	entorhinal L	ASD-Unlikely vs ASD-Possible	0.0655082	-0.22751	–	0.358526	0.997
12	gamma	ncc	entorhinal L	ASD-Unlikely vs ASD-Probable	0.0167542	-0.326385	–	0.359893	0.997
12	gamma	ncc	entorhinal L	ASD-Possible vs ASD-Probable	-0.048754	-0.38551	–	0.288002	0.997
12	gamma	ncc	entorhinal R	ASD-Unlikely vs ASD-Possible	0.0963631	-0.207253	–	0.399979	0.997
12	gamma	ncc	entorhinal R	ASD-Unlikely vs ASD-Probable	0.282664	-0.0791635	–	0.644491	0.997
12	gamma	ncc	entorhinal R	ASD-Possible vs ASD-Probable	0.186301	-0.156816	–	0.529417	0.997
12	gamma	ncc	frontal pole L	ASD-Unlikely vs ASD-Possible	-0.0614921	-0.526004	–	0.40302	0.997
12	gamma	ncc	frontal pole L	ASD-Unlikely vs ASD-Probable	-0.0564016	-0.588611	–	0.475808	0.997
12	gamma	ncc	frontal pole L	ASD-Possible vs ASD-Probable	0.00509047	-0.514714	–	0.524895	0.997
12	gamma	ncc	frontal pole R	ASD-Unlikely vs ASD-Possible	-0.152007	-0.609769	–	0.305756	0.997
12	gamma	ncc	frontal pole R	ASD-Unlikely vs ASD-Probable	-0.0659345	-0.593025	–	0.461157	0.997
12	gamma	ncc	frontal pole R	ASD-Possible vs ASD-Probable	0.0860721	-0.416679	–	0.588823	0.997
12	gamma	ncc	fusiform L	ASD-Unlikely vs ASD-Possible	-0.00991629	-0.391187	–	0.371355	0.997
12	gamma	ncc	fusiform L	ASD-Unlikely vs ASD-Probable	-0.161107	-0.600197	–	0.277984	0.997
12	gamma	ncc	fusiform L	ASD-Possible vs ASD-Probable	-0.15119	-0.58372	–	0.28134	0.997
12	gamma	ncc	fusiform R	ASD-Unlikely vs ASD-Possible	0.111214	-0.233445	–	0.455874	0.997
12	gamma	ncc	fusiform R	ASD-Unlikely vs ASD-Probable	0.0189691	-0.400585	–	0.438523	0.997
12	gamma	ncc	fusiform R	ASD-Possible vs ASD-Probable	-0.0922451	-0.497996	–	0.313505	0.997
12	gamma	ncc	inferior parietal L	ASD-Unlikely vs ASD-Possible	0.368758	-0.375912	–	1.11343	0.997
12	gamma	ncc	inferior parietal L	ASD-Unlikely vs ASD-Probable	0.140752	-0.720195	–	1.0017	0.997
12	gamma	ncc	inferior parietal L	ASD-Possible vs ASD-Probable	-0.228006	-1.10606	–	0.650047	0.997
12	gamma	ncc	inferior parietal R	ASD-Unlikely vs ASD-Possible	-0.603649	-1.42085	–	0.213549	0.997
12	gamma	ncc	inferior parietal R	ASD-Unlikely vs ASD-Probable	-0.779209	-1.78489	–	0.226468	0.997
12	gamma	ncc	inferior parietal R	ASD-Possible vs ASD-Probable	-0.17556	-1.06783	–	0.716713	0.997
12	gamma	ncc	inferior temporal L	ASD-Unlikely vs ASD-Possible	0.0151406	-0.373623	–	0.403904	0.997
12	gamma	ncc	inferior temporal L	ASD-Unlikely vs ASD-Probable	-0.125632	-0.581262	–	0.329998	0.997
12	gamma	ncc	inferior temporal L	ASD-Possible vs ASD-Probable	-0.140772	-0.585747	–	0.304202	0.997
12	gamma	ncc	inferior temporal R	ASD-Unlikely vs ASD-Possible	-0.0063036	-0.38832	–	0.375713	0.997
12	gamma	ncc	inferior temporal R	ASD-Unlikely vs ASD-Probable	0.149501	-0.307885	–	0.606887	0.997
12	gamma	ncc	inferior temporal R	ASD-Possible vs ASD-Probable	0.155805	-0.296485	–	0.608094	0.997
12	gamma	ncc	insula L	ASD-Unlikely vs ASD-Possible	0.103393	-0.294856	–	0.501642	0.997
12	gamma	ncc	insula L	ASD-Unlikely vs ASD-Probable	0.149185	-0.320624	–	0.618993	0.997
12	gamma	ncc	insula L	ASD-Possible vs ASD-Probable	0.0457914	-0.414172	–	0.505755	0.997
12	gamma	ncc	insula R	ASD-Unlikely vs ASD-Possible	0.119173	-0.215478	–	0.453824	0.997
12	gamma	ncc	insula R	ASD-Unlikely vs ASD-Probable	-0.00321685	-0.396011	–	0.389577	0.997
12	gamma	ncc	insula R	ASD-Possible vs ASD-Probable	-0.12239	-0.505984	–	0.261204	0.997
12	gamma	ncc	isthmus cingulate L	ASD-Unlikely vs ASD-Possible	0.295003	-0.0788614	–	0.668868	0.997
12	gamma	ncc	isthmus cingulate L	ASD-Unlikely vs ASD-Probable	0.286178	-0.149821	–	0.722177	0.997
12	gamma	ncc	isthmus cingulate L	ASD-Possible vs ASD-Probable	-0.00882534	-0.432699	–	0.415048	0.997
12	gamma	ncc	isthmus cingulate R	ASD-Unlikely vs ASD-Possible	-0.156359	-0.507482	–	0.194763	0.997
12	gamma	ncc	isthmus cingulate R	ASD-Unlikely vs ASD-Probable	0.0407092	-0.380972	–	0.46239	0.997
12	gamma	ncc	isthmus cingulate R	ASD-Possible vs ASD-Probable	0.197069	-0.222254	–	0.616392	0.997
12	gamma	ncc	lateral occipital L	ASD-Unlikely vs ASD-Possible	-0.187441	-0.71901	–	0.344128	0.997
12	gamma	ncc	lateral occipital L	ASD-Unlikely vs ASD-Probable	-0.289528	-0.906635	–	0.32758	0.997
12	gamma	ncc	lateral occipital L	ASD-Possible vs ASD-Probable	-0.102087	-0.692545	–	0.488371	0.997
12	gamma	ncc	lateral occipital R	ASD-Unlikely vs ASD-Possible	-0.3504	-0.876887	–	0.176086	0.997
12	gamma	ncc	lateral occipital R	ASD-Unlikely vs ASD-Probable	0.163913	-0.434385	–	0.76221	0.997
12	gamma	ncc	lateral occipital R	ASD-Possible vs ASD-Probable	0.514313	-0.066492	–	1.09512	0.997
12	gamma	ncc	lateral orbitofrontal L	ASD-Unlikely vs ASD-Possible	0.0842704	-0.23476	–	0.403301	0.997
12	gamma	ncc	lateral orbitofrontal L	ASD-Unlikely vs ASD-Probable	0.0355909	-0.333983	–	0.405165	0.997
12	gamma	ncc	lateral orbitofrontal L	ASD-Possible vs ASD-Probable	-0.0486795	-0.414718	–	0.317359	0.997
12	gamma	ncc	lateral orbitofrontal R	ASD-Unlikely vs ASD-Possible	0.227602	-0.102694	–	0.557898	0.997
12	gamma	ncc	lateral orbitofrontal R	ASD-Unlikely vs ASD-Probable	-0.0625874	-0.45294	–	0.327765	0.997
12	gamma	ncc	lateral orbitofrontal R	ASD-Possible vs ASD-Probable	-0.290189	-0.671391	–	0.0910123	0.997
12	gamma	ncc	lingual L	ASD-Unlikely vs ASD-Possible	0.0105642	-0.33337	–	0.354499	0.997
12	gamma	ncc	lingual L	ASD-Unlikely vs ASD-Probable	0.22077	-0.199698	–	0.641238	0.997
12	gamma	ncc	lingual L	ASD-Possible vs ASD-Probable	0.210205	-0.195665	–	0.616076	0.997
12	gamma	ncc	lingual R	ASD-Unlikely vs ASD-Possible	0.115146	-0.231582	–	0.461874	0.997
12	gamma	ncc	lingual R	ASD-Unlikely vs ASD-Probable	0.0550348	-0.353981	–	0.46405	0.997
12	gamma	ncc	lingual R	ASD-Possible vs ASD-Probable	-0.0601113	-0.461356	–	0.341134	0.997
12	gamma	ncc	medial orbitofrontal L	ASD-Unlikely vs ASD-Possible	-0.232619	-0.555438	–	0.0902001	0.997
12	gamma	ncc	medial orbitofrontal L	ASD-Unlikely vs ASD-Probable	-0.193999	-0.570629	–	0.182632	0.997
12	gamma	ncc	medial orbitofrontal L	ASD-Possible vs ASD-Probable	0.03862	-0.333884	–	0.411124	0.997
12	gamma	ncc	medial orbitofrontal R	ASD-Unlikely vs ASD-Possible	0.0330525	-0.247298	–	0.313403	0.997
12	gamma	ncc	medial orbitofrontal R	ASD-Unlikely vs ASD-Probable	0.106958	-0.22367	–	0.437587	0.997
12	gamma	ncc	medial orbitofrontal R	ASD-Possible vs ASD-Probable	0.0739058	-0.243135	–	0.390947	0.997
12	gamma	ncc	middle temporal L	ASD-Unlikely vs ASD-Possible	0.0291182	-0.3919	–	0.450136	0.997
12	gamma	ncc	middle temporal L	ASD-Unlikely vs ASD-Probable	0.00206327	-0.499006	–	0.503133	0.997
12	gamma	ncc	middle temporal L	ASD-Possible vs ASD-Probable	-0.027055	-0.512502	–	0.458392	0.997
12	gamma	ncc	middle temporal R	ASD-Unlikely vs ASD-Possible	0.010026	-0.33591	–	0.355962	0.997
12	gamma	ncc	middle temporal R	ASD-Unlikely vs ASD-Probable	0.12322	-0.286456	–	0.532895	0.997
12	gamma	ncc	middle temporal R	ASD-Possible vs ASD-Probable	0.113194	-0.292463	–	0.518851	0.997
12	gamma	ncc	paracentral L	ASD-Unlikely vs ASD-Possible	-0.296417	-0.984158	–	0.391325	0.997
12	gamma	ncc	paracentral L	ASD-Unlikely vs ASD-Probable	-0.00669278	-0.800895	–	0.78751	0.997
12	gamma	ncc	paracentral L	ASD-Possible vs ASD-Probable	0.289724	-0.455478	–	1.03493	0.997
12	gamma	ncc	paracentral R	ASD-Unlikely vs ASD-Possible	0.102071	-0.510524	–	0.714665	0.997
12	gamma	ncc	paracentral R	ASD-Unlikely vs ASD-Probable	-0.0501822	-0.735966	–	0.635602	0.997
12	gamma	ncc	paracentral R	ASD-Possible vs ASD-Probable	-0.152253	-0.82871	–	0.524204	0.997
12	gamma	ncc	parahippocampal L	ASD-Unlikely vs ASD-Possible	-0.0478839	-0.360296	–	0.264528	0.997
12	gamma	ncc	parahippocampal L	ASD-Unlikely vs ASD-Probable	-0.0918318	-0.454635	–	0.270971	0.997
12	gamma	ncc	parahippocampal L	ASD-Possible vs ASD-Probable	-0.0439479	-0.404898	–	0.317002	0.997
12	gamma	ncc	parahippocampal R	ASD-Unlikely vs ASD-Possible	-0.0777824	-0.420746	–	0.265181	0.997
12	gamma	ncc	parahippocampal R	ASD-Unlikely vs ASD-Probable	-0.120418	-0.529043	–	0.288207	0.997
12	gamma	ncc	parahippocampal R	ASD-Possible vs ASD-Probable	-0.0426355	-0.444321	–	0.35905	0.997
12	gamma	ncc	pars opercularis L	ASD-Unlikely vs ASD-Possible	0.122006	-0.302862	–	0.546874	0.997
12	gamma	ncc	pars opercularis L	ASD-Unlikely vs ASD-Probable	-0.0904073	-0.617803	–	0.436988	0.997
12	gamma	ncc	pars opercularis L	ASD-Possible vs ASD-Probable	-0.212413	-0.712371	–	0.287545	0.997
12	gamma	ncc	pars opercularis R	ASD-Unlikely vs ASD-Possible	-0.0849943	-0.540286	–	0.370298	0.997
12	gamma	ncc	pars opercularis R	ASD-Unlikely vs ASD-Probable	-0.275065	-0.844953	–	0.294824	0.997
12	gamma	ncc	pars opercularis R	ASD-Possible vs ASD-Probable	-0.19007	-0.737678	–	0.357537	0.997
12	gamma	ncc	pars orbitalis L	ASD-Unlikely vs ASD-Possible	0.0608772	-0.296066	–	0.41782	0.997
12	gamma	ncc	pars orbitalis L	ASD-Unlikely vs ASD-Probable	0.0257454	-0.402523	–	0.454013	0.997
12	gamma	ncc	pars orbitalis L	ASD-Possible vs ASD-Probable	-0.0351318	-0.451166	–	0.380902	0.997
12	gamma	ncc	pars orbitalis R	ASD-Unlikely vs ASD-Possible	0.00283098	-0.352113	–	0.357775	0.997
12	gamma	ncc	pars orbitalis R	ASD-Unlikely vs ASD-Probable	-0.227403	-0.639547	–	0.18474	0.997
12	gamma	ncc	pars orbitalis R	ASD-Possible vs ASD-Probable	-0.230234	-0.637582	–	0.177114	0.997
12	gamma	ncc	pars triangularis L	ASD-Unlikely vs ASD-Possible	-0.0207436	-0.531881	–	0.490394	0.997
12	gamma	ncc	pars triangularis L	ASD-Unlikely vs ASD-Probable	-0.327945	-0.959724	–	0.303833	0.997
12	gamma	ncc	pars triangularis L	ASD-Possible vs ASD-Probable	-0.307202	-0.911833	–	0.29743	0.997
12	gamma	ncc	pars triangularis R	ASD-Unlikely vs ASD-Possible	-0.246583	-0.625478	–	0.132313	0.997
12	gamma	ncc	pars triangularis R	ASD-Unlikely vs ASD-Probable	-0.211632	-0.657596	–	0.234332	0.997
12	gamma	ncc	pars triangularis R	ASD-Possible vs ASD-Probable	0.0349506	-0.407582	–	0.477483	0.997
12	gamma	ncc	pericalcarine L	ASD-Unlikely vs ASD-Possible	-0.196401	-0.631705	–	0.238903	0.997
12	gamma	ncc	pericalcarine L	ASD-Unlikely vs ASD-Probable	-0.0641063	-0.630083	–	0.50187	0.997
12	gamma	ncc	pericalcarine L	ASD-Possible vs ASD-Probable	0.132295	-0.39228	–	0.65687	0.997
12	gamma	ncc	pericalcarine R	ASD-Unlikely vs ASD-Possible	-0.212507	-0.645963	–	0.220949	0.997
12	gamma	ncc	pericalcarine R	ASD-Unlikely vs ASD-Probable	0.0775812	-0.44	–	0.595163	0.997
12	gamma	ncc	pericalcarine R	ASD-Possible vs ASD-Probable	0.290088	-0.216234	–	0.79641	0.997
12	gamma	ncc	postcentral L	ASD-Unlikely vs ASD-Possible	-0.115293	-0.900741	–	0.670154	0.997
12	gamma	ncc	postcentral L	ASD-Unlikely vs ASD-Probable	-0.588576	-1.67314	–	0.495987	0.997
12	gamma	ncc	postcentral L	ASD-Possible vs ASD-Probable	-0.473283	-1.48082	–	0.534251	0.997
12	gamma	ncc	postcentral R	ASD-Unlikely vs ASD-Possible	-0.338915	-0.939293	–	0.261463	0.997
12	gamma	ncc	postcentral R	ASD-Unlikely vs ASD-Probable	-0.740662	-1.45028	–	-0.031048	0.997
12	gamma	ncc	postcentral R	ASD-Possible vs ASD-Probable	-0.401746	-1.1048	–	0.301308	0.997
12	gamma	ncc	posterior cingulate L	ASD-Unlikely vs ASD-Possible	-0.0770869	-0.589138	–	0.434964	0.997
12	gamma	ncc	posterior cingulate L	ASD-Unlikely vs ASD-Probable	0.0147355	-0.61884	–	0.648311	0.997
12	gamma	ncc	posterior cingulate L	ASD-Possible vs ASD-Probable	0.0918224	-0.518728	–	0.702373	0.997
12	gamma	ncc	posterior cingulate R	ASD-Unlikely vs ASD-Possible	-0.319617	-0.874211	–	0.234977	0.997
12	gamma	ncc	posterior cingulate R	ASD-Unlikely vs ASD-Probable	0.00148679	-0.653443	–	0.656416	0.997
12	gamma	ncc	posterior cingulate R	ASD-Possible vs ASD-Probable	0.321104	-0.309068	–	0.951276	0.997
12	gamma	ncc	precentral L	ASD-Unlikely vs ASD-Possible	-0.379003	-1.05581	–	0.297807	0.997
12	gamma	ncc	precentral L	ASD-Unlikely vs ASD-Probable	-0.216205	-1.06777	–	0.635358	0.997
12	gamma	ncc	precentral L	ASD-Possible vs ASD-Probable	0.162799	-0.651256	–	0.976853	0.997
12	gamma	ncc	precentral R	ASD-Unlikely vs ASD-Possible	-0.492057	-1.15211	–	0.167991	0.997
12	gamma	ncc	precentral R	ASD-Unlikely vs ASD-Probable	-1.27062	-2.18988	–	-0.351357	0.325
12	gamma	ncc	precentral R	ASD-Possible vs ASD-Probable	-0.778563	-1.67809	–	0.120969	0.997
12	gamma	ncc	precuneus L	ASD-Unlikely vs ASD-Possible	0.0776575	-0.458383	–	0.613698	0.997
12	gamma	ncc	precuneus L	ASD-Unlikely vs ASD-Probable	-0.189897	-0.793709	–	0.413916	0.997
12	gamma	ncc	precuneus L	ASD-Possible vs ASD-Probable	-0.267554	-0.887416	–	0.352307	0.997
12	gamma	ncc	precuneus R	ASD-Unlikely vs ASD-Possible	-0.280355	-0.79149	–	0.23078	0.997
12	gamma	ncc	precuneus R	ASD-Unlikely vs ASD-Probable	-0.652653	-1.23393	–	-0.0713723	0.809
12	gamma	ncc	precuneus R	ASD-Possible vs ASD-Probable	-0.372298	-0.958486	–	0.213889	0.997
12	gamma	ncc	rostral anterior cingulate L	ASD-Unlikely vs ASD-Possible	0.269143	-0.0854405	–	0.623726	0.997
12	gamma	ncc	rostral anterior cingulate L	ASD-Unlikely vs ASD-Probable	0.0224674	-0.384063	–	0.428998	0.997
12	gamma	ncc	rostral anterior cingulate L	ASD-Possible vs ASD-Probable	-0.246675	-0.646255	–	0.152904	0.997
12	gamma	ncc	rostral anterior cingulate R	ASD-Unlikely vs ASD-Possible	0.326151	-0.0834272	–	0.735729	0.997
12	gamma	ncc	rostral anterior cingulate R	ASD-Unlikely vs ASD-Probable	0.174203	-0.309848	–	0.658254	0.997
12	gamma	ncc	rostral anterior cingulate R	ASD-Possible vs ASD-Probable	-0.151948	-0.609783	–	0.305887	0.997
12	gamma	ncc	rostral middle frontal L	ASD-Unlikely vs ASD-Possible	0.0146168	-0.577337	–	0.606571	0.997
12	gamma	ncc	rostral middle frontal L	ASD-Unlikely vs ASD-Probable	-0.927088	-1.61158	–	-0.2426	0.325
12	gamma	ncc	rostral middle frontal L	ASD-Possible vs ASD-Probable	-0.941705	-1.62665	–	-0.256762	0.325
12	gamma	ncc	rostral middle frontal R	ASD-Unlikely vs ASD-Possible	0.52038	-0.005488	–	1.04625	0.997
12	gamma	ncc	rostral middle frontal R	ASD-Unlikely vs ASD-Probable	0.264687	-0.282581	–	0.811955	0.997
12	gamma	ncc	rostral middle frontal R	ASD-Possible vs ASD-Probable	-0.255693	-0.812063	–	0.300678	0.997
12	gamma	ncc	superior frontal L	ASD-Unlikely vs ASD-Possible	-0.173584	-1.07551	–	0.728343	0.997
12	gamma	ncc	superior frontal L	ASD-Unlikely vs ASD-Probable	-0.317918	-1.39889	–	0.763056	0.997
12	gamma	ncc	superior frontal L	ASD-Possible vs ASD-Probable	-0.144334	-1.1391	–	0.850435	0.997
12	gamma	ncc	superior frontal R	ASD-Unlikely vs ASD-Possible	-0.702828	-1.48933	–	0.0836789	0.997
12	gamma	ncc	superior frontal R	ASD-Unlikely vs ASD-Probable	-0.669385	-1.64169	–	0.302925	0.997
12	gamma	ncc	superior frontal R	ASD-Possible vs ASD-Probable	0.0334428	-0.896862	–	0.963747	0.997
12	gamma	ncc	superior parietal L	ASD-Unlikely vs ASD-Possible	-0.594294	-1.46039	–	0.271799	0.997
12	gamma	ncc	superior parietal L	ASD-Unlikely vs ASD-Probable	-1.77928	-2.82152	–	-0.737035	0.167
12	gamma	ncc	superior parietal L	ASD-Possible vs ASD-Probable	-1.18498	-2.17398	–	-0.195985	0.641
12	gamma	ncc	superior parietal R	ASD-Unlikely vs ASD-Possible	-0.373505	-1.02053	–	0.273519	0.997
12	gamma	ncc	superior parietal R	ASD-Unlikely vs ASD-Probable	-0.607662	-1.38549	–	0.17017	0.997
12	gamma	ncc	superior parietal R	ASD-Possible vs ASD-Probable	-0.234156	-1.0025	–	0.534186	0.997
12	gamma	ncc	superior temporal L	ASD-Unlikely vs ASD-Possible	-0.0282034	-0.451854	–	0.395447	0.997
12	gamma	ncc	superior temporal L	ASD-Unlikely vs ASD-Probable	-0.170838	-0.676469	–	0.334793	0.997
12	gamma	ncc	superior temporal L	ASD-Possible vs ASD-Probable	-0.142634	-0.629416	–	0.344147	0.997
12	gamma	ncc	superior temporal R	ASD-Unlikely vs ASD-Possible	0.125266	-0.283852	–	0.534383	0.997
12	gamma	ncc	superior temporal R	ASD-Unlikely vs ASD-Probable	0.0278522	-0.444655	–	0.500359	0.997
12	gamma	ncc	superior temporal R	ASD-Possible vs ASD-Probable	-0.0974134	-0.563643	–	0.368816	0.997
12	gamma	ncc	supramarginal L	ASD-Unlikely vs ASD-Possible	-0.463655	-1.36188	–	0.434566	0.997
12	gamma	ncc	supramarginal L	ASD-Unlikely vs ASD-Probable	-0.685876	-1.66598	–	0.29423	0.997
12	gamma	ncc	supramarginal L	ASD-Possible vs ASD-Probable	-0.222221	-1.11581	–	0.671369	0.997
12	gamma	ncc	supramarginal R	ASD-Unlikely vs ASD-Possible	-0.45489	-1.22022	–	0.310441	0.997
12	gamma	ncc	supramarginal R	ASD-Unlikely vs ASD-Probable	-0.249173	-1.0901	–	0.591751	0.997
12	gamma	ncc	supramarginal R	ASD-Possible vs ASD-Probable	0.205717	-0.646505	–	1.05794	0.997
12	gamma	ncc	temporal pole L	ASD-Unlikely vs ASD-Possible	0.0708837	-0.308089	–	0.449856	0.997
12	gamma	ncc	temporal pole L	ASD-Unlikely vs ASD-Probable	-0.110831	-0.552097	–	0.330436	0.997
12	gamma	ncc	temporal pole L	ASD-Possible vs ASD-Probable	-0.181714	-0.615932	–	0.252503	0.997
12	gamma	ncc	temporal pole R	ASD-Unlikely vs ASD-Possible	-0.0777227	-0.385701	–	0.230256	0.997
12	gamma	ncc	temporal pole R	ASD-Unlikely vs ASD-Probable	-0.0332929	-0.396661	–	0.330076	0.997
12	gamma	ncc	temporal pole R	ASD-Possible vs ASD-Probable	0.0444298	-0.313173	–	0.402032	0.997
12	gamma	ncc	transverse temporal L	ASD-Unlikely vs ASD-Possible	0.312463	-0.250616	–	0.875543	0.997
12	gamma	ncc	transverse temporal L	ASD-Unlikely vs ASD-Probable	0.12766	-0.542512	–	0.797833	0.997
12	gamma	ncc	transverse temporal L	ASD-Possible vs ASD-Probable	-0.184803	-0.848182	–	0.478576	0.997
12	gamma	ncc	transverse temporal R	ASD-Unlikely vs ASD-Possible	0.169366	-0.332036	–	0.670769	0.997
12	gamma	ncc	transverse temporal R	ASD-Unlikely vs ASD-Probable	0.214657	-0.393313	–	0.822626	0.997
12	gamma	ncc	transverse temporal R	ASD-Possible vs ASD-Probable	0.0452901	-0.550057	–	0.640637	0.997
12	gamma	npl	bankssts L	ASD-Unlikely vs ASD-Possible	0.171978	-0.185961	–	0.529918	0.972
12	gamma	npl	bankssts L	ASD-Unlikely vs ASD-Probable	-0.191456	-0.683423	–	0.300512	0.972
12	gamma	npl	bankssts L	ASD-Possible vs ASD-Probable	-0.363434	-0.943198	–	0.21633	0.972
12	gamma	npl	bankssts R	ASD-Unlikely vs ASD-Possible	0.0856661	-0.299143	–	0.470475	0.972
12	gamma	npl	bankssts R	ASD-Unlikely vs ASD-Probable	-0.03559	-0.54918	–	0.478	0.972
12	gamma	npl	bankssts R	ASD-Possible vs ASD-Probable	-0.121256	-0.735335	–	0.492823	0.972
12	gamma	npl	caudal anterior cingulate L	ASD-Unlikely vs ASD-Possible	-0.0664464	-0.419306	–	0.286414	0.972
12	gamma	npl	caudal anterior cingulate L	ASD-Unlikely vs ASD-Probable	-0.179121	-0.67417	–	0.315928	0.972
12	gamma	npl	caudal anterior cingulate L	ASD-Possible vs ASD-Probable	-0.112675	-0.686578	–	0.461229	0.972
12	gamma	npl	caudal anterior cingulate R	ASD-Unlikely vs ASD-Possible	-0.0700298	-0.419382	–	0.279322	0.972
12	gamma	npl	caudal anterior cingulate R	ASD-Unlikely vs ASD-Probable	0.263535	-0.220795	–	0.747865	0.972
12	gamma	npl	caudal anterior cingulate R	ASD-Possible vs ASD-Probable	0.333565	-0.232776	–	0.899906	0.972
12	gamma	npl	caudal middle frontal L	ASD-Unlikely vs ASD-Possible	-0.101718	-0.390204	–	0.186767	0.972
12	gamma	npl	caudal middle frontal L	ASD-Unlikely vs ASD-Probable	-0.180697	-0.575182	–	0.213789	0.972
12	gamma	npl	caudal middle frontal L	ASD-Possible vs ASD-Probable	-0.0789783	-0.543318	–	0.385361	0.972
12	gamma	npl	caudal middle frontal R	ASD-Unlikely vs ASD-Possible	0.00584362	-0.426474	–	0.438162	0.982
12	gamma	npl	caudal middle frontal R	ASD-Unlikely vs ASD-Probable	-0.137024	-0.734299	–	0.460252	0.972
12	gamma	npl	caudal middle frontal R	ASD-Possible vs ASD-Probable	-0.142867	-0.84095	–	0.555215	0.972
12	gamma	npl	cuneus L	ASD-Unlikely vs ASD-Possible	0.162868	-0.159492	–	0.485228	0.972
12	gamma	npl	cuneus L	ASD-Unlikely vs ASD-Probable	-0.075765	-0.520172	–	0.368642	0.972
12	gamma	npl	cuneus L	ASD-Possible vs ASD-Probable	-0.238633	-0.762042	–	0.284775	0.972
12	gamma	npl	cuneus R	ASD-Unlikely vs ASD-Possible	0.0654307	-0.342207	–	0.473069	0.972
12	gamma	npl	cuneus R	ASD-Unlikely vs ASD-Probable	-0.107497	-0.657938	–	0.442944	0.972
12	gamma	npl	cuneus R	ASD-Possible vs ASD-Probable	-0.172928	-0.822798	–	0.476943	0.972
12	gamma	npl	entorhinal L	ASD-Unlikely vs ASD-Possible	-0.00511146	-0.0802913	–	0.0700684	0.972
12	gamma	npl	entorhinal L	ASD-Unlikely vs ASD-Probable	-0.0784092	-0.184182	–	0.0273636	0.972
12	gamma	npl	entorhinal L	ASD-Possible vs ASD-Probable	-0.0732977	-0.1965	–	0.0499042	0.972
12	gamma	npl	entorhinal R	ASD-Unlikely vs ASD-Possible	-0.0023464	-0.205631	–	0.200938	0.982
12	gamma	npl	entorhinal R	ASD-Unlikely vs ASD-Probable	-0.0488622	-0.328308	–	0.230584	0.972
12	gamma	npl	entorhinal R	ASD-Possible vs ASD-Probable	-0.0465158	-0.374505	–	0.281473	0.972
12	gamma	npl	frontal pole L	ASD-Unlikely vs ASD-Possible	0.0603792	-0.166225	–	0.286983	0.972
12	gamma	npl	frontal pole L	ASD-Unlikely vs ASD-Probable	-0.102323	-0.430335	–	0.22569	0.972
12	gamma	npl	frontal pole L	ASD-Possible vs ASD-Probable	-0.162702	-0.540917	–	0.215513	0.972
12	gamma	npl	frontal pole R	ASD-Unlikely vs ASD-Possible	0.0182065	-0.132143	–	0.168556	0.972
12	gamma	npl	frontal pole R	ASD-Unlikely vs ASD-Probable	-0.127162	-0.336163	–	0.0818391	0.972
12	gamma	npl	frontal pole R	ASD-Possible vs ASD-Probable	-0.145369	-0.388043	–	0.0973057	0.972
12	gamma	npl	fusiform L	ASD-Unlikely vs ASD-Possible	-0.11315	-0.375579	–	0.14928	0.972
12	gamma	npl	fusiform L	ASD-Unlikely vs ASD-Probable	-0.0110155	-0.369929	–	0.347898	0.981
12	gamma	npl	fusiform L	ASD-Possible vs ASD-Probable	0.102134	-0.319683	–	0.523952	0.972
12	gamma	npl	fusiform R	ASD-Unlikely vs ASD-Possible	0.129713	-0.0993103	–	0.358735	0.972
12	gamma	npl	fusiform R	ASD-Unlikely vs ASD-Probable	0.233862	-0.0785678	–	0.546291	0.972
12	gamma	npl	fusiform R	ASD-Possible vs ASD-Probable	0.104149	-0.264243	–	0.472542	0.972
12	gamma	npl	inferior parietal L	ASD-Unlikely vs ASD-Possible	0.130691	-0.35653	–	0.617912	0.972
12	gamma	npl	inferior parietal L	ASD-Unlikely vs ASD-Probable	-0.189339	-0.840537	–	0.46186	0.972
12	gamma	npl	inferior parietal L	ASD-Possible vs ASD-Probable	-0.32003	-1.09695	–	0.456891	0.972
12	gamma	npl	inferior parietal R	ASD-Unlikely vs ASD-Possible	0.0524448	-0.449233	–	0.554123	0.972
12	gamma	npl	inferior parietal R	ASD-Unlikely vs ASD-Probable	-0.160844	-0.836032	–	0.514343	0.972
12	gamma	npl	inferior parietal R	ASD-Possible vs ASD-Probable	-0.213289	-1.01408	–	0.587502	0.972
12	gamma	npl	inferior temporal L	ASD-Unlikely vs ASD-Possible	0.077795	-0.0940264	–	0.249616	0.972
12	gamma	npl	inferior temporal L	ASD-Unlikely vs ASD-Probable	0.0350464	-0.20156	–	0.271653	0.972
12	gamma	npl	inferior temporal L	ASD-Possible vs ASD-Probable	-0.0427486	-0.320365	–	0.234867	0.972
12	gamma	npl	inferior temporal R	ASD-Unlikely vs ASD-Possible	-0.061187	-0.259117	–	0.136743	0.972
12	gamma	npl	inferior temporal R	ASD-Unlikely vs ASD-Probable	0.10771	-0.167841	–	0.383261	0.972
12	gamma	npl	inferior temporal R	ASD-Possible vs ASD-Probable	0.168897	-0.15292	–	0.490714	0.972
12	gamma	npl	insula L	ASD-Unlikely vs ASD-Possible	-0.0176699	-0.282227	–	0.246887	0.972
12	gamma	npl	insula L	ASD-Unlikely vs ASD-Probable	0.154079	-0.217733	–	0.525892	0.972
12	gamma	npl	insula L	ASD-Possible vs ASD-Probable	0.171749	-0.259728	–	0.603227	0.972
12	gamma	npl	insula R	ASD-Unlikely vs ASD-Possible	0.0193763	-0.263497	–	0.30225	0.972
12	gamma	npl	insula R	ASD-Unlikely vs ASD-Probable	0.123567	-0.269041	–	0.516174	0.972
12	gamma	npl	insula R	ASD-Possible vs ASD-Probable	0.104191	-0.352674	–	0.561055	0.972
12	gamma	npl	isthmus cingulate L	ASD-Unlikely vs ASD-Possible	0.00218933	-0.0768721	–	0.0812507	0.981
12	gamma	npl	isthmus cingulate L	ASD-Unlikely vs ASD-Probable	0.108301	-0.00326949	–	0.219872	0.972
12	gamma	npl	isthmus cingulate L	ASD-Possible vs ASD-Probable	0.106112	-0.0231264	–	0.23535	0.972
12	gamma	npl	isthmus cingulate R	ASD-Unlikely vs ASD-Possible	-0.0333478	-0.235903	–	0.169208	0.972
12	gamma	npl	isthmus cingulate R	ASD-Unlikely vs ASD-Probable	0.0617508	-0.214324	–	0.337825	0.972
12	gamma	npl	isthmus cingulate R	ASD-Possible vs ASD-Probable	0.0950986	-0.230093	–	0.420291	0.972
12	gamma	npl	lateral occipital L	ASD-Unlikely vs ASD-Possible	-0.117922	-0.405939	–	0.170096	0.972
12	gamma	npl	lateral occipital L	ASD-Unlikely vs ASD-Probable	-0.386175	-0.792678	–	0.0203285	0.972
12	gamma	npl	lateral occipital L	ASD-Possible vs ASD-Probable	-0.268253	-0.741716	–	0.205209	0.972
12	gamma	npl	lateral occipital R	ASD-Unlikely vs ASD-Possible	0.0356089	-0.278822	–	0.35004	0.972
12	gamma	npl	lateral occipital R	ASD-Unlikely vs ASD-Probable	-0.291441	-0.719632	–	0.13675	0.972
12	gamma	npl	lateral occipital R	ASD-Possible vs ASD-Probable	-0.32705	-0.831302	–	0.177203	0.972
12	gamma	npl	lateral orbitofrontal L	ASD-Unlikely vs ASD-Possible	0.0356909	-0.134788	–	0.206169	0.972
12	gamma	npl	lateral orbitofrontal L	ASD-Unlikely vs ASD-Probable	0.0783089	-0.15982	–	0.316437	0.972
12	gamma	npl	lateral orbitofrontal L	ASD-Possible vs ASD-Probable	0.0426179	-0.235247	–	0.320483	0.972
12	gamma	npl	lateral orbitofrontal R	ASD-Unlikely vs ASD-Possible	-0.0436139	-0.284301	–	0.197073	0.972
12	gamma	npl	lateral orbitofrontal R	ASD-Unlikely vs ASD-Probable	-0.193994	-0.525844	–	0.137855	0.972
12	gamma	npl	lateral orbitofrontal R	ASD-Possible vs ASD-Probable	-0.150381	-0.535717	–	0.234956	0.972
12	gamma	npl	lingual L	ASD-Unlikely vs ASD-Possible	-0.140696	-0.254153	–	-0.0272389	0.972
12	gamma	npl	lingual L	ASD-Unlikely vs ASD-Probable	-0.212806	-0.374461	–	-0.0511512	0.972
12	gamma	npl	lingual L	ASD-Possible vs ASD-Probable	-0.07211	-0.258667	–	0.114447	0.972
12	gamma	npl	lingual R	ASD-Unlikely vs ASD-Possible	0.173472	-0.1294	–	0.476344	0.972
12	gamma	npl	lingual R	ASD-Unlikely vs ASD-Probable	0.240592	-0.176366	–	0.657551	0.972
12	gamma	npl	lingual R	ASD-Possible vs ASD-Probable	0.0671204	-0.421167	–	0.555408	0.972
12	gamma	npl	medial orbitofrontal L	ASD-Unlikely vs ASD-Possible	0.0888669	-0.0922951	–	0.270029	0.972
12	gamma	npl	medial orbitofrontal L	ASD-Unlikely vs ASD-Probable	-0.0217458	-0.276921	–	0.233429	0.972
12	gamma	npl	medial orbitofrontal L	ASD-Possible vs ASD-Probable	-0.110613	-0.407806	–	0.186581	0.972
12	gamma	npl	medial orbitofrontal R	ASD-Unlikely vs ASD-Possible	0.0553819	-0.180004	–	0.290768	0.972
12	gamma	npl	medial orbitofrontal R	ASD-Unlikely vs ASD-Probable	-0.0607487	-0.389595	–	0.268098	0.972
12	gamma	npl	medial orbitofrontal R	ASD-Possible vs ASD-Probable	-0.116131	-0.498531	–	0.266269	0.972
12	gamma	npl	middle temporal L	ASD-Unlikely vs ASD-Possible	-0.0128107	-0.214018	–	0.188396	0.972
12	gamma	npl	middle temporal L	ASD-Unlikely vs ASD-Probable	-0.185773	-0.465202	–	0.0936551	0.972
12	gamma	npl	middle temporal L	ASD-Possible vs ASD-Probable	-0.172963	-0.499974	–	0.154049	0.972
12	gamma	npl	middle temporal R	ASD-Unlikely vs ASD-Possible	-0.1029	-0.363054	–	0.157254	0.972
12	gamma	npl	middle temporal R	ASD-Unlikely vs ASD-Probable	-0.0883855	-0.445234	–	0.268463	0.972
12	gamma	npl	middle temporal R	ASD-Possible vs ASD-Probable	0.0145144	-0.403061	–	0.43209	0.981
12	gamma	npl	paracentral L	ASD-Unlikely vs ASD-Possible	-0.054276	-0.411591	–	0.303039	0.972
12	gamma	npl	paracentral L	ASD-Unlikely vs ASD-Probable	-0.109691	-0.593921	–	0.37454	0.972
12	gamma	npl	paracentral L	ASD-Possible vs ASD-Probable	-0.0554149	-0.624694	–	0.513864	0.972
12	gamma	npl	paracentral R	ASD-Unlikely vs ASD-Possible	-0.0466645	-0.351043	–	0.257714	0.972
12	gamma	npl	paracentral R	ASD-Unlikely vs ASD-Probable	-0.00796864	-0.427365	–	0.411427	0.981
12	gamma	npl	paracentral R	ASD-Possible vs ASD-Probable	0.0386958	-0.450983	–	0.528374	0.972
12	gamma	npl	parahippocampal L	ASD-Unlikely vs ASD-Possible	0.0258563	-0.122461	–	0.174174	0.972
12	gamma	npl	parahippocampal L	ASD-Unlikely vs ASD-Probable	-0.0794021	-0.28781	–	0.129006	0.972
12	gamma	npl	parahippocampal L	ASD-Possible vs ASD-Probable	-0.105258	-0.347971	–	0.137454	0.972
12	gamma	npl	parahippocampal R	ASD-Unlikely vs ASD-Possible	-0.0115529	-0.187175	–	0.16407	0.972
12	gamma	npl	parahippocampal R	ASD-Unlikely vs ASD-Probable	0.13786	-0.106925	–	0.382645	0.972
12	gamma	npl	parahippocampal R	ASD-Possible vs ASD-Probable	0.149413	-0.136396	–	0.435221	0.972
12	gamma	npl	pars opercularis L	ASD-Unlikely vs ASD-Possible	0.029401	-0.238539	–	0.297341	0.972
12	gamma	npl	pars opercularis L	ASD-Unlikely vs ASD-Probable	-0.0190926	-0.379182	–	0.340997	0.981
12	gamma	npl	pars opercularis L	ASD-Possible vs ASD-Probable	-0.0484937	-0.475674	–	0.378687	0.972
12	gamma	npl	pars opercularis R	ASD-Unlikely vs ASD-Possible	-0.0295432	-0.309109	–	0.250022	0.972
12	gamma	npl	pars opercularis R	ASD-Unlikely vs ASD-Probable	0.101348	-0.292103	–	0.494799	0.972
12	gamma	npl	pars opercularis R	ASD-Possible vs ASD-Probable	0.130891	-0.325591	–	0.587374	0.972
12	gamma	npl	pars orbitalis L	ASD-Unlikely vs ASD-Possible	-0.0990409	-0.311828	–	0.113747	0.972
12	gamma	npl	pars orbitalis L	ASD-Unlikely vs ASD-Probable	0.209272	-0.0889007	–	0.507444	0.972
12	gamma	npl	pars orbitalis L	ASD-Possible vs ASD-Probable	0.308312	-0.0387145	–	0.655339	0.972
12	gamma	npl	pars orbitalis R	ASD-Unlikely vs ASD-Possible	-0.0072567	-0.207882	–	0.193368	0.981
12	gamma	npl	pars orbitalis R	ASD-Unlikely vs ASD-Probable	-0.104971	-0.392272	–	0.182329	0.972
12	gamma	npl	pars orbitalis R	ASD-Possible vs ASD-Probable	-0.0977146	-0.428776	–	0.233347	0.972
12	gamma	npl	pars triangularis L	ASD-Unlikely vs ASD-Possible	-0.0707568	-0.292888	–	0.151374	0.972
12	gamma	npl	pars triangularis L	ASD-Unlikely vs ASD-Probable	0.0320913	-0.277699	–	0.341882	0.972
12	gamma	npl	pars triangularis L	ASD-Possible vs ASD-Probable	0.102848	-0.259789	–	0.465485	0.972
12	gamma	npl	pars triangularis R	ASD-Unlikely vs ASD-Possible	-0.0873484	-0.3283	–	0.153603	0.972
12	gamma	npl	pars triangularis R	ASD-Unlikely vs ASD-Probable	-0.0506269	-0.391711	–	0.290457	0.972
12	gamma	npl	pars triangularis R	ASD-Possible vs ASD-Probable	0.0367215	-0.355644	–	0.429087	0.972
12	gamma	npl	pericalcarine L	ASD-Unlikely vs ASD-Possible	-0.0483569	-0.26391	–	0.167197	0.972
12	gamma	npl	pericalcarine L	ASD-Unlikely vs ASD-Probable	-0.165701	-0.470847	–	0.139444	0.972
12	gamma	npl	pericalcarine L	ASD-Possible vs ASD-Probable	-0.117344	-0.471153	–	0.236464	0.972
12	gamma	npl	pericalcarine R	ASD-Unlikely vs ASD-Possible	0.187333	-0.161343	–	0.53601	0.972
12	gamma	npl	pericalcarine R	ASD-Unlikely vs ASD-Probable	-0.15803	-0.637313	–	0.321254	0.972
12	gamma	npl	pericalcarine R	ASD-Possible vs ASD-Probable	-0.345363	-0.908677	–	0.217952	0.972
12	gamma	npl	postcentral L	ASD-Unlikely vs ASD-Possible	-0.034941	-0.399287	–	0.329405	0.972
12	gamma	npl	postcentral L	ASD-Unlikely vs ASD-Probable	-0.203079	-0.695367	–	0.289209	0.972
12	gamma	npl	postcentral L	ASD-Possible vs ASD-Probable	-0.168138	-0.750106	–	0.41383	0.972
12	gamma	npl	postcentral R	ASD-Unlikely vs ASD-Possible	-0.160595	-0.615487	–	0.294296	0.972
12	gamma	npl	postcentral R	ASD-Unlikely vs ASD-Probable	-0.143168	-0.758898	–	0.472562	0.972
12	gamma	npl	postcentral R	ASD-Possible vs ASD-Probable	0.0174275	-0.706956	–	0.741811	0.981
12	gamma	npl	posterior cingulate L	ASD-Unlikely vs ASD-Possible	-0.0618921	-0.26594	–	0.142156	0.972
12	gamma	npl	posterior cingulate L	ASD-Unlikely vs ASD-Probable	-0.188927	-0.47364	–	0.0957866	0.972
12	gamma	npl	posterior cingulate L	ASD-Possible vs ASD-Probable	-0.127035	-0.459619	–	0.20555	0.972
12	gamma	npl	posterior cingulate R	ASD-Unlikely vs ASD-Possible	-0.0981211	-0.407406	–	0.211164	0.972
12	gamma	npl	posterior cingulate R	ASD-Unlikely vs ASD-Probable	-0.263435	-0.6953	–	0.168431	0.972
12	gamma	npl	posterior cingulate R	ASD-Possible vs ASD-Probable	-0.165313	-0.667521	–	0.336894	0.972
12	gamma	npl	precentral L	ASD-Unlikely vs ASD-Possible	0.0899661	-0.235443	–	0.415376	0.972
12	gamma	npl	precentral L	ASD-Unlikely vs ASD-Probable	0.0124288	-0.422718	–	0.447576	0.981
12	gamma	npl	precentral L	ASD-Possible vs ASD-Probable	-0.0775374	-0.595289	–	0.440214	0.972
12	gamma	npl	precentral R	ASD-Unlikely vs ASD-Possible	-0.0875466	-0.437131	–	0.262038	0.972
12	gamma	npl	precentral R	ASD-Unlikely vs ASD-Probable	-0.108599	-0.588835	–	0.371638	0.972
12	gamma	npl	precentral R	ASD-Possible vs ASD-Probable	-0.0210522	-0.582431	–	0.540326	0.981
12	gamma	npl	precuneus L	ASD-Unlikely vs ASD-Possible	-0.0243702	-0.348716	–	0.299976	0.972
12	gamma	npl	precuneus L	ASD-Unlikely vs ASD-Probable	-0.0672212	-0.507019	–	0.372577	0.972
12	gamma	npl	precuneus L	ASD-Possible vs ASD-Probable	-0.042851	-0.562478	–	0.476777	0.972
12	gamma	npl	precuneus R	ASD-Unlikely vs ASD-Possible	0.164885	-0.301461	–	0.63123	0.972
12	gamma	npl	precuneus R	ASD-Unlikely vs ASD-Probable	-0.0741423	-0.697821	–	0.549536	0.972
12	gamma	npl	precuneus R	ASD-Possible vs ASD-Probable	-0.239027	-0.979312	–	0.501258	0.972
12	gamma	npl	rostral anterior cingulate L	ASD-Unlikely vs ASD-Possible	0.105691	-0.119354	–	0.330736	0.972
12	gamma	npl	rostral anterior cingulate L	ASD-Unlikely vs ASD-Probable	-0.0344778	-0.349941	–	0.280986	0.972
12	gamma	npl	rostral anterior cingulate L	ASD-Possible vs ASD-Probable	-0.140169	-0.509453	–	0.229115	0.972
12	gamma	npl	rostral anterior cingulate R	ASD-Unlikely vs ASD-Possible	0.0394368	-0.123796	–	0.202669	0.972
12	gamma	npl	rostral anterior cingulate R	ASD-Unlikely vs ASD-Probable	-0.0184486	-0.251605	–	0.214708	0.972
12	gamma	npl	rostral anterior cingulate R	ASD-Possible vs ASD-Probable	-0.0578854	-0.328366	–	0.212595	0.972
[truncated: 18,403 more rows]

## Sheet: TableS4
Supplementary Table 4. Relationship of SW and SRS total T-scores
vs. SW	Coefficient	Robust SE	95% CI			t	p	R2
delta	-0.011	0.003	-0.016	–	-0.005	-4.02	0.0001**	0.181
theta	-0.008	0.003	-0.014	–	-0.003	-3.04	0.003*	0.108
beta	-0.008	0.003	-0.014	–	-0.002	-2.57	0.012*	0.086
gamma	-0.007	0.003	-0.013	–	-0.001	-2.5	0.015*	0.082
* represents significant difference (p < 0.05), ** represents significant difference (p < 0.000). SW, small-worldness; SRS, Social Responsiveness Scale.
